# Supplementary material
Source: ML conference proceedings conference paper supplement (https://proceedings.neurips.cc/paper_files/paper/2019/hash/6c4bb406b3e7cd5447f7a76fd7008806-Abstract.html)
Supplement: Supplementary file [file 6c4bb406b3e7cd5447f7a76fd7008806-Supplemental.zip]

---

# Supplementary Material for “Effective End-to-end Unsupervised Outlier Detection via Inlier Priority of Discriminative Network”

---

## 1 Operation Set $\mathcal{O}$ for Surrogate Supervision

For  $\mathcal{O}$ , each operation  $O(\cdot|y) \in \mathcal{O}$  is defined as a combination of one or more basic transformations from transformation sets below: **1) Rotation**, which includes simple rotation transformations that clock-wisely rotates images by integer times of  $90^\circ$ :  $\mathcal{T}_{SR} = \{Rot(\cdot, (y-1) \cdot 90^\circ)\}_{y=1}^4$ , and irregular rotation transformations by integer times of  $30^\circ$  (transformations already in  $\mathcal{T}_{SR}$  are excluded):  $\mathcal{T}_{IR} = \{Rot(\cdot, (y-1) \cdot 30^\circ)\}_{y=1}^{12} - \mathcal{T}_{SR}$ . **2) Flip**:  $\mathcal{T}_F = \{Flip(\cdot, y)\}_{y=0}^1$ , where  $y = 1/0$  refers to flipping the image or not. **3) Shifting**, which includes x-axis shifting:  $\mathcal{T}_{Sx} = \{S_x(\cdot, (y-2) \cdot D)\}_{y=1}^3$  and y-axis shifting:  $\mathcal{T}_{Sy} = \{S_y(\cdot, (y-2) \cdot D)\}_{y=1}^3$  ( $D$  is the step of shifting). **4) Patch re-arranging**, which partitions the image into  $M$  equally-sized patches and re-organizes them into a new image by a permutation selected from  $M!$  possible permutations:  $\mathcal{T}_{PR} = \{PR(\cdot, perm_y)\}_{y=1}^{M!}$ . Then we join the transformation sets into three operation subsets, regular affine operation set  $\mathcal{O}_{RA}$ , irregular affine operation set  $\mathcal{O}_{IA}$  and patch re-arranging operation set  $\mathcal{O}_{PR}$ :

$$\mathcal{O}_{RA} = \mathcal{T}_{SR} \times \mathcal{T}_F \times (\mathcal{T}_{Sx} \times \mathcal{T}_{Sy}), \quad \mathcal{O}_{IA} = \mathcal{T}_{IR} \times \mathcal{T}_F, \quad \mathcal{O}_{PR} = \mathcal{T}_{PR} \quad (1)$$

where “ $\times$ ” refers to Cartesian product. Therefore, we obtain  $4 \times 2 \times (3 \times 3) = 72$  operations for  $\mathcal{O}_{RA}$ ,  $(12 - 4) \times 2 = 16$  operations for  $\mathcal{O}_{IA}$  and  $4! = 24$  operations for  $\mathcal{O}_{PR}$ , so the final  $\mathcal{O}$  has  $72 + 16 + 24 - 1 = 111$  operations in total (The permutation that corresponds to the original image in  $\mathcal{O}_{PR}$  is excluded). In our experiments, we set  $D = 8$  pixels and  $M = 4$ . There are several remarks: **1)** The reason why we construct operation sets as (1) is to augment the number of operations without joining two transformations that both produce image artifact (e.g. shifting and irregular rotation), which will degrade the UOD performance. **2)** It is NOT compulsory to apply all operations in  $\mathcal{O}$  to provide surrogate supervision. In fact, our experiments show that  $\mathcal{O}_{RA}$  can produce good UOD performance as well, but a union of  $\mathcal{O}_{RA}$ ,  $\mathcal{O}_{IA}$  and  $\mathcal{O}_{PR}$  will produce the best results. **3)** Other operations like colorization [1] or temporal shuffle [2] can be incorporated into the surrogate supervision for better UOD performance or deal with other data types, such as videos or optical flow.

## 2 Theoretical Derivation on Priority by Gradient Magnitude

To obtain (3) in the original manuscript, we consider an SSD with its network weights randomly initialized by i.i.d. uniform distribution on  $[-1, 1]$ . Suppose that the network of SSD has an  $(L + 1)$ -node penultimate layer and a final  $K$ -node softmax layer. We discuss the case of inliers  $X_{in}$  first: For cross-entropy loss  $\mathcal{L}$ , only transformed inliers generated by the  $c$ -th operation  $X_{in}^{(c)} = \{\mathbf{x}^{(c)} | \mathbf{x} \in X_{in}\}$  are used to update  $\mathbf{w}_c$ . The gradient vector incurred by  $X_{in}^{(c)}$  is denoted by  $\nabla_{\mathbf{w}_c}^{(in)} \mathcal{L} = [\nabla_{w_{s,c}} \mathcal{L}]_{s=1}^{(L+1)}$  with its element  $\nabla_{w_{s,c}} \mathcal{L}$  given by:

$$\nabla_{w_{s,c}} \mathcal{L} = \sum_{i=1}^{N_{in}} \nabla_{w_{s,c}} \mathcal{L}(\mathbf{x}_i) = \sum_{i=1}^{N_{in}} (P^{(c)}(\mathbf{x}_i) - 1) h^{(s)}(\mathbf{x}_i) \quad (2)$$

where  $N_{in}$  is the inlier number ( $N_{out}$  is the outlier number),  $P^{(c)}(\mathbf{x}_i)$  is the  $c$ -th node's output of the softmax layer and  $h^{(s)}(\mathbf{x}_i)$  is the  $s$ -th node's output of the penultimate layer for  $\mathbf{x}_i \in X_{in}^{(c)}$ . Since SSD is randomly initialized, we compute the expectation of inliers' gradient magnitude to update  $\mathbf{w}_c$ , i.e.  $E(\|\nabla_{\mathbf{w}_c}^{(in)} \mathcal{L}\|_2^2)$ . As  $\|\nabla_{\mathbf{w}_c}^{(in)} \mathcal{L}\|_2^2 = \sum_{s=1}^{L+1} (\nabla_{w_{s,c}} \mathcal{L})^2$ , it needs to compute the term below:

$$E((\nabla_{w_{s,c}} \mathcal{L})^2) = E((\sum_{i=1}^{N_{in}} \nabla_{w_{s,c}} \mathcal{L}(\mathbf{x}_i))^2) = \sum_{i=1}^{N_{in}} \sum_{j=1}^{N_{in}} E(\nabla_{w_{s,c}} \mathcal{L}(\mathbf{x}_i) \nabla_{w_{s,c}} \mathcal{L}(\mathbf{x}_j)). \quad (3)$$

To compute (3), we first define a function  $g_{ij}^{(s,c)}$  as follows:

$$g_{ij}^{(s,c)} = \nabla_{w_{s,c}} \mathcal{L}(\mathbf{x}_i) \nabla_{w_{s,c}} \mathcal{L}(\mathbf{x}_j) = (P^{(c)}(\mathbf{x}_i) - 1)(P^{(c)}(\mathbf{x}_j) - 1)h^{(s)}(\mathbf{x}_i)h^{(s)}(\mathbf{x}_j) \quad (4)$$

where  $h^{(s)}(\mathbf{x}_i)$  is the penultimate layer's  $s$ -th node's output and  $P^{(c)}(\mathbf{x}_i)$  denotes the softmax layer's  $c$ -th node's output for  $\mathbf{x}_i$ . Our goal is to compute  $E(g_{ij}^{(s,c)})$  w.r.t the weights between the penultimate layer and the final softmax layer, which is a  $(L+1) \times K$  vector  $\mathbf{w} = [\mathbf{w}_c]_{c=1}^K$ , with the weights associated with the  $c$ -th class ( $1 \leq c \leq K$ ) to be a  $(L+1)$  column vector  $\mathbf{w}_c = [w_{s,c}]_{s=1}^{L+1}$ . To simplify computation, we use the second-order Taylor series expansion of  $g_{ij}^{(s,c)}$ :

$$g_{ij}^{(s,c)}(\mathbf{w}) \approx g_{ij}^{(s,c)}(\boldsymbol{\mu}) + \nabla_{\mathbf{w}} g_{ij}^{(s,c)}(\boldsymbol{\mu}) \cdot (\mathbf{w} - \boldsymbol{\mu}) + \frac{1}{2}(\mathbf{w} - \boldsymbol{\mu})^T \cdot \nabla_{\mathbf{w}}^2 g_{ij}^{(s,c)}(\boldsymbol{\mu}) \cdot (\mathbf{w} - \boldsymbol{\mu}) \quad (5)$$

where  $\boldsymbol{\mu}$  is the expectation of  $\mathbf{w}$ . Since each weight in  $\mathbf{w}$  is drawn from i.i.d uniform distribution on  $[-1, 1]$ , we have  $\mu_{s,c} = E(w_{s,c}) = 0$ ,  $E(w_{s,c}^2) = \frac{1}{3}$  and  $E(w_{s,c}w_{t,c}) = 0$  ( $s \neq t$ ). Therefore, the expectation of  $g_{ij}^{(s,c)}$  w.r.t.  $\mathbf{w}$  is approximated as

$$E(g_{ij}^{(s,c)}(\mathbf{w})) \approx g_{ij}^{(s,c)}(\mathbf{0}) + \frac{1}{2} \sum_{t=1}^{L+1} \sum_{l=1}^K \nabla_{w_{t,l}}^2 g_{ij}^{(s,c)}(\mathbf{0}) E(w_{s,c}^2) = g_{ij}^{(s,c)}(\mathbf{0}) + \frac{1}{6} \sum_{t=1}^{L+1} \sum_{l=1}^K \nabla_{w_{t,l}}^2 g_{ij}^{(s,c)}(\mathbf{0}). \quad (6)$$

Thus, computing  $E(g_{ij}^{(s,c)}(\mathbf{w}))$  requires the computation of  $\nabla_{w_{t,l}}^2 g_{ij}^{(s,c)}(\mathbf{0})$ . Recall the softmax probability is computed by:

$$P^{(c)}(\mathbf{x}_i) = \frac{e^{\mathbf{h}^\top(\mathbf{x}_i) \cdot \mathbf{w}_c}}{\sum_{l=1}^K e^{\mathbf{h}^\top(\mathbf{x}_i) \cdot \mathbf{w}_l}} \quad (7)$$

where  $\mathbf{h}(\mathbf{x}_i) = [h^{(s)}(\mathbf{x}_i)]_{s=1}^{L+1}$  is penultimate layer's output for  $\mathbf{x}_i$ . Since  $\mathbf{h}(\mathbf{x}_i)$  is independent of  $\mathbf{w}$ , we have:

$$\nabla_{w_{t,l}} P^{(c)}(\mathbf{x}_i) = -P^{(c)}(\mathbf{x}_i)(\delta_{c,l} - P^{(l)}(\mathbf{x}_i)) \cdot h^{(t)}(\mathbf{x}_i) \quad (8)$$

where  $\delta_{c,l} = 1$  if  $c = l$  and  $\delta_{c,l} = 0$  otherwise. Using (4), (7) and (8), we can calculate  $\nabla_{w_{t,l}}^2 g_{ij}^{(s,c)}$  by:

$$\begin{aligned} \nabla_{w_{t,l}}^2 g_{ij}^{(s,c)} &= h^{(s)}(\mathbf{x}_i)h^{(s)}(\mathbf{x}_j) \left[ -(h^{(t)}(\mathbf{x}_i))^2 \cdot P^{(c)}(\mathbf{x}_i)(\delta_{c,l} - P^{(l)}(\mathbf{x}_i))^2(1 - P^{(c)}(\mathbf{x}_j)) \right. \\ &\quad + (h^{(t)}(\mathbf{x}_i))^2 \cdot P^{(c)}(\mathbf{x}_i)P^{(l)}(\mathbf{x}_i)(1 - P^{(l)}(\mathbf{x}_i))(1 - P^{(c)}(\mathbf{x}_j)) \\ &\quad + 2 \cdot h^{(t)}(\mathbf{x}_i)h^{(t)}(\mathbf{x}_j) \cdot P^{(c)}(\mathbf{x}_i)P^{(c)}(\mathbf{x}_j)(\delta_{c,l} - P^{(l)}(\mathbf{x}_i))(\delta_{c,l} - P^{(l)}(\mathbf{x}_j)) \\ &\quad - (h^{(t)}(\mathbf{x}_j))^2 \cdot P^{(c)}(\mathbf{x}_j)(\delta_{c,l} - P^{(l)}(\mathbf{x}_j))^2(1 - P^{(c)}(\mathbf{x}_i)) \\ &\quad \left. + (h^{(t)}(\mathbf{x}_j))^2 \cdot P^{(c)}(\mathbf{x}_j)P^{(l)}(\mathbf{x}_j)(1 - P^{(l)}(\mathbf{x}_j))(1 - P^{(c)}(\mathbf{x}_i)) \right]. \quad (9) \end{aligned}$$

Therefore, in the summation term of (6), we have  $(L + 1)$  terms that satisfy  $c = l$ , and in this case  $\nabla_{w_{t,l}}^2 g_{ij}^{(s,c)}|_{\mathbf{w}=\mathbf{0}}$  is:

$$h^{(s)}(\mathbf{x}_i)h^{(s)}(\mathbf{x}_j) \left[ (h^{(t)}(\mathbf{x}_i))^2 \frac{(K-1)^2(2-K)}{K^4} + (h^{(t)}(\mathbf{x}_j))^2 \frac{(K-1)^2(2-K)}{K^4} + 2h^{(t)}(\mathbf{x}_i)h^{(t)}(\mathbf{x}_j) \frac{(K-1)^2}{K^4} \right]. \quad (10)$$

For the rest  $(L + 1)(K - 1)$  terms in the summation term that satisfy  $c \neq l$ ,  $\nabla_{w_{t,l}}^2 g_{ij}^{(s,c)}|_{\mathbf{w}=\mathbf{0}}$  is:

$$h^{(s)}(\mathbf{x}_i)h^{(s)}(\mathbf{x}_j) \left[ (h^{(t)}(\mathbf{x}_i))^2 \frac{(K-1)(K-2)}{K^4} + (h^{(t)}(\mathbf{x}_j))^2 \frac{(K-1)(K-2)}{K^4} + 2h^{(t)}(\mathbf{x}_i)h^{(t)}(\mathbf{x}_j) \frac{1}{K^4} \right]. \quad (11)$$

By substituting (10) and (11) into (6), we can obtain the result of (5) in the original manuscript:

$$E(\nabla_{w_{s,c}} \mathcal{L}(\mathbf{x}_i) \nabla_{w_{s,c}} \mathcal{L}(\mathbf{x}_j)) = E(g_{ij}^{(s,c)}(\mathbf{w})) \approx h^{(s)}(\mathbf{x}_i)h^{(s)}(\mathbf{x}_j) \left[ \frac{(K-1)^2}{K^2} + \frac{(K-1)}{3K^3} \sum_{t=1}^{L+1} h^{(t)}(\mathbf{x}_i)h^{(t)}(\mathbf{x}_j) \right]. \quad (12)$$

It remains to calculate the expectation of  $h^{(t)}(\mathbf{x}_i)h^{(t)}(\mathbf{x}_j)$  in (12). To make its calculation tractable, we consider a simplified case of a network with a single hidden-layer and sigmoid activation. In this case, by [3, Lemma 3.b], the expectation of  $h^{(s)}(\mathbf{x}_i)h^{(s)}(\mathbf{x}_j)$  w.r.t. the randomly initialized weights between the input and hidden layer satisfies  $E(h^{(s)}(\mathbf{x}_i)h^{(s)}(\mathbf{x}_j)) \approx \frac{1}{4}$  and  $E(h^{(s)}(\mathbf{x}_i)^2 h^{(s)}(\mathbf{x}_j)^2) \approx \frac{1}{16}$ . Thus, by definition of  $\|\nabla_{\mathbf{w}_c}^{(in)} \mathcal{L}\|_2^2$  and (3), we yield:

$$E(\|\nabla_{\mathbf{w}_c}^{(in)} \mathcal{L}\|_2^2) \approx N_{in}^2 \left[ (L+1) \left( \frac{(K-1)^2}{4K^2} + \frac{(K-1)(L+1)}{48K^3} \right) \right] \triangleq N_{in}^2 \cdot A. \quad (13)$$

Since  $L, K, A$  are constant, (13) suggests that the magnitude of inliers' gradient  $E(\|\nabla_{\mathbf{w}_c}^{(in)} \mathcal{L}\|_2^2)$  is proportional to  $N_{in}^2$ . Similarly, outliers' gradient magnitude  $E(\|\nabla_{\mathbf{w}_c}^{(out)} \mathcal{L}\|_2^2) \approx N_{out}^2 \cdot A$ . Thus, it is easy to obtain:

$$\frac{E(\|\nabla_{\mathbf{w}_c}^{(in)} \mathcal{L}\|_2^2)}{E(\|\nabla_{\mathbf{w}_c}^{(out)} \mathcal{L}\|_2^2)} \approx \frac{N_{in}^2}{N_{out}^2} \quad (14)$$

### 3 Implementation Details of Compared Methods

For all AE based methods, we adopt a deep CAE with the architecture below: *conv*( $k = 3, s = 2$ ) – *bn* – *Relu* – *conv*( $k = 3, s = 2$ ) – *bn* – *relu* – *conv*( $k = 3, s = 2$ ) – *bn* – *relu* – *reshape* – *fc*(4096, 256) – *tanh* – *fc*(256, 4096) – *bn* – *relu* – *reshape* – *deconv*( $k = 3, s = 2$ ) – *bn* – *relu* – *deconv*( $k = 3, s = 2$ ) – *bn* – *relu* – *deconv*( $k = 3, s = 2$ ) – *tanh*, while  $k$  and  $s$  refer to kernel size and stride. For each individual method, the parameters are set as follows: **1)** CAE [4]. CAE is trained by Mean Square Error Loss (MSE) and its reconstruction loss is directly used to perform UOD. The CAE is trained by default Adam optimizer in PyTorch<sup>1</sup> for 250 epochs with learning rate 0.001 and weight decay 0.0005. The batch size is 128. **2)** CAE-IF. CAE-IF is a decoupled/hybrid method that feeds the learned representations of CAE into isolation forest (IF) [5]. The training of CAE is the illustrated above, and the IF is realized by scikit-learn framework<sup>2</sup>. The contamination parameter of IF is set by  $p = \rho$  to yield better UOD performance for comparison with *E<sup>3</sup>Outlier*, and other parameters are set to default values in scikit-learn. **3)** Discriminative reconstruction based autoencoder (DRAE) [6]. We set DRAE's encouraging term weight  $\lambda = 0.1$  as recommended in [6], while other training setting is the same as CAE. **4)** Robust deep autoencoder (RDAE) [7]. We set  $\lambda = 0.00065$  for RDAE's regularization, which performs best in the empirical evaluation of [7]. To yield the best performance, we use 20 outer epochs and 1 inner epochs for the

<sup>1</sup><https://pytorch.org/>

<sup>2</sup><https://scikit-learn.org/>

alternating optimization. **5)** Deep autoencoding gaussian mixture model (DAGMM) [8]. As suggested by [8], we adopt  $\lambda_1 = 0.1$ ,  $\lambda_2 = 0.005$  for the energy regularization term and the singularity penalty term respectively. An Adam optimizer with the recommended learning rate 0.0001 is used to optimize the CAE and density estimation network for 200 epochs. The batch size is 1024 as set in [8]. **6)** SSD-IF. SSD-IF shares  $E^3Outlier$ 's SSD part but directly feeds SSD's learned representations into IF to perform UOD, which is a comparison to  $E^3Outlier$ 's end-to-end UOD. SSD-IF shares exactly the same IF setting with CAE-IF. The experiments are run on a PC with dual NVIDIA Titan Xp GPU, 64 GiB RAM and Intel 7820X CPU, under a programming environment with Python 3.6, PyTorch 0.4.1 and Keras 2.2.0.

## 4 Detailed Results of UOD Performance

We present detailed results of UOD performance comparison on each class of benchmarks in Table 1-15. The AUROC results are given in Table 1-5, while the AUPR results are given in Table 6-15. Note that only NE based performance is shown for  $E^3Outlier$  due to limit of space. In each table, the best overall UOD performance ("average") on each benchmark is shown in bold.

## References

- [1] Richard Zhang, Phillip Isola, and Alexei A Efros. Colorful image colorization. In *European conference on computer vision*, pages 649–666. Springer, 2016.
- [2] Ishan Misra, C Lawrence Zitnick, and Martial Hebert. Shuffle and learn: unsupervised learning using temporal order verification. In *European Conference on Computer Vision*, pages 527–544. Springer, 2016.
- [3] Rangachari Anand, Kishan G Mehrotra, Chilukuri K Mohan, and Sanjay Ranka. An improved algorithm for neural network classification of imbalanced training sets. *IEEE Transactions on Neural Networks*, 4(6):962–969, 1993.
- [4] Jonathan Masci, Ueli Meier, Dan Cireşan, and Jürgen Schmidhuber. Stacked convolutional auto-encoders for hierarchical feature extraction. In *International Conference on Artificial Neural Networks*, pages 52–59. Springer, 2011.
- [5] Fei Tony Liu, Kai Ming Ting, and Zhi-Hua Zhou. Isolation forest. In *2008 Eighth IEEE International Conference on Data Mining*, pages 413–422. IEEE, 2008.
- [6] Yan Xia, Xudong Cao, Fang Wen, Gang Hua, and Jian Sun. Learning discriminative reconstructions for unsupervised outlier removal. In *Proceedings of the IEEE International Conference on Computer Vision (ICCV)*, pages 1511–1519, 2015.
- [7] Chong Zhou and Randy C Paffenroth. Anomaly detection with robust deep autoencoders. In *Proceedings of the 23rd ACM SIGKDD International Conference on Knowledge Discovery and Data Mining*, pages 665–674. ACM, 2017.
- [8] Bo Zong, Qi Song, Martin Renqiang Min, Wei Cheng, Cristian Lumezanu, Daeki Cho, and Haifeng Chen. Deep autoencoding gaussian mixture model for unsupervised anomaly detection. In *International Conference on Learning Representations (ICLR)*, 2018.

Table 1: AUROC (%) when  $\rho = 0.05$ 

| Dataset       | Class name                     | CAE              | CAE-IF           | DRAE              | RDAE              | DAGMM             | SSD-IF                             | $E^3$ Outlier                      |
|---------------|--------------------------------|------------------|------------------|-------------------|-------------------|-------------------|------------------------------------|------------------------------------|
| MNIST         | 0                              | 57.43 $\pm$ 3.06 | 92.78 $\pm$ 0.93 | 62.39 $\pm$ 3.62  | 69.63 $\pm$ 2.39  | 71.30 $\pm$ 21.72 | 92.54 $\pm$ 0.99                   | 96.25 $\pm$ 0.28                   |
|               | 1                              | 99.31 $\pm$ 0.09 | 99.39 $\pm$ 0.06 | 83.05 $\pm$ 11.22 | 99.36 $\pm$ 0.08  | 87.19 $\pm$ 12.48 | 97.69 $\pm$ 0.21                   | 96.99 $\pm$ 0.55                   |
|               | 2                              | 59.89 $\pm$ 5.24 | 77.84 $\pm$ 2.17 | 69.23 $\pm$ 9.98  | 62.82 $\pm$ 3.49  | 50.32 $\pm$ 11.76 | 94.68 $\pm$ 0.49                   | 93.86 $\pm$ 0.44                   |
|               | 3                              | 63.72 $\pm$ 1.96 | 85.18 $\pm$ 1.08 | 63.11 $\pm$ 7.12  | 68.33 $\pm$ 2.49  | 47.45 $\pm$ 4.02  | 97.59 $\pm$ 0.50                   | 97.72 $\pm$ 0.22                   |
|               | 4                              | 71.30 $\pm$ 2.10 | 85.94 $\pm$ 2.85 | 70.51 $\pm$ 6.28  | 74.74 $\pm$ 1.52  | 62.07 $\pm$ 4.94  | 96.47 $\pm$ 0.59                   | 96.62 $\pm$ 0.35                   |
|               | 5                              | 61.38 $\pm$ 3.40 | 81.62 $\pm$ 2.11 | 57.36 $\pm$ 4.21  | 67.80 $\pm$ 1.71  | 53.07 $\pm$ 3.56  | 96.22 $\pm$ 0.99                   | 93.42 $\pm$ 0.58                   |
|               | 6                              | 71.89 $\pm$ 4.76 | 90.45 $\pm$ 1.43 | 66.68 $\pm$ 9.13  | 77.43 $\pm$ 1.87  | 52.15 $\pm$ 12.88 | 98.50 $\pm$ 0.35                   | 97.36 $\pm$ 0.18                   |
|               | 7                              | 82.70 $\pm$ 2.55 | 93.60 $\pm$ 0.58 | 79.31 $\pm$ 3.45  | 88.57 $\pm$ 1.44  | 71.52 $\pm$ 8.51  | 95.45 $\pm$ 0.54                   | 94.54 $\pm$ 0.45                   |
|               | 8                              | 47.98 $\pm$ 6.95 | 74.71 $\pm$ 1.49 | 49.91 $\pm$ 5.14  | 50.91 $\pm$ 4.25  | 52.67 $\pm$ 6.14  | 89.52 $\pm$ 2.44                   | 89.43 $\pm$ 0.81                   |
|               | 9                              | 77.08 $\pm$ 2.13 | 91.21 $\pm$ 0.78 | 74.00 $\pm$ 7.22  | 79.99 $\pm$ 2.47  | 59.45 $\pm$ 7.92  | 96.44 $\pm$ 0.55                   | 95.42 $\pm$ 0.14                   |
|               | <i>average</i>                 | 69.27 $\pm$ 1.02 | 87.27 $\pm$ 0.34 | 67.56 $\pm$ 2.84  | 73.96 $\pm$ 0.83  | 60.72 $\pm$ 2.09  | <b>95.51 <math>\pm</math> 0.30</b> | 95.16 $\pm$ 0.15                   |
| Fashion-MNIST | t-shirt                        | 65.88 $\pm$ 5.02 | 87.28 $\pm$ 0.79 | 66.83 $\pm$ 6.48  | 77.48 $\pm$ 1.10  | 64.53 $\pm$ 15.40 | 90.77 $\pm$ 1.31                   | 94.00 $\pm$ 0.39                   |
|               | trouser                        | 97.02 $\pm$ 0.21 | 96.76 $\pm$ 0.52 | 88.31 $\pm$ 4.18  | 97.07 $\pm$ 0.27  | 69.94 $\pm$ 18.29 | 98.42 $\pm$ 0.10                   | 98.73 $\pm$ 0.18                   |
|               | pullover                       | 65.89 $\pm$ 5.19 | 84.24 $\pm$ 1.21 | 66.56 $\pm$ 3.36  | 73.83 $\pm$ 4.12  | 50.17 $\pm$ 10.66 | 90.00 $\pm$ 1.11                   | 91.59 $\pm$ 1.41                   |
|               | dress                          | 79.74 $\pm$ 1.96 | 87.97 $\pm$ 1.84 | 76.50 $\pm$ 3.09  | 80.18 $\pm$ 2.61  | 77.50 $\pm$ 14.41 | 92.39 $\pm$ 0.42                   | 92.73 $\pm$ 0.67                   |
|               | coat                           | 72.91 $\pm$ 2.44 | 84.74 $\pm$ 1.44 | 64.64 $\pm$ 1.91  | 74.10 $\pm$ 3.76  | 55.17 $\pm$ 7.93  | 90.61 $\pm$ 1.02                   | 91.50 $\pm$ 1.13                   |
|               | sandal                         | 80.91 $\pm$ 4.66 | 70.19 $\pm$ 2.17 | 76.13 $\pm$ 6.09  | 75.56 $\pm$ 12.49 | 84.09 $\pm$ 6.49  | 90.34 $\pm$ 1.04                   | 93.42 $\pm$ 0.70                   |
|               | shirt                          | 56.62 $\pm$ 5.11 | 79.67 $\pm$ 1.25 | 55.87 $\pm$ 1.99  | 69.43 $\pm$ 2.39  | 59.90 $\pm$ 6.33  | 82.58 $\pm$ 1.46                   | 84.46 $\pm$ 1.15                   |
|               | sneaker                        | 94.26 $\pm$ 1.04 | 94.60 $\pm$ 1.09 | 92.75 $\pm$ 1.77  | 95.00 $\pm$ 0.48  | 67.44 $\pm$ 26.98 | 98.66 $\pm$ 0.30                   | 99.17 $\pm$ 0.29                   |
|               | bag                            | 51.22 $\pm$ 4.38 | 70.40 $\pm$ 1.61 | 48.00 $\pm$ 2.27  | 58.78 $\pm$ 4.68  | 44.84 $\pm$ 8.31  | 91.37 $\pm$ 0.69                   | 95.47 $\pm$ 0.52                   |
|               | ankle-boot                     | 86.44 $\pm$ 2.16 | 91.65 $\pm$ 0.93 | 79.24 $\pm$ 3.36  | 87.82 $\pm$ 2.43  | 67.16 $\pm$ 16.22 | 98.72 $\pm$ 0.17                   | 99.47 $\pm$ 0.09                   |
|               | <i>average</i>                 | 75.09 $\pm$ 0.45 | 84.75 $\pm$ 0.15 | 71.48 $\pm$ 0.61  | 78.93 $\pm$ 1.17  | 64.07 $\pm$ 5.95  | 92.39 $\pm$ 0.20                   | <b>94.05 <math>\pm</math> 0.13</b> |
| CIFAR10       | airplane                       | 69.24 $\pm$ 2.48 | 62.68 $\pm$ 0.86 | 72.09 $\pm$ 0.62  | 64.37 $\pm$ 3.64  | 52.24 $\pm$ 9.36  | 57.98 $\pm$ 3.45                   | 79.44 $\pm$ 1.15                   |
|               | automobile                     | 41.79 $\pm$ 1.73 | 31.72 $\pm$ 0.86 | 39.55 $\pm$ 2.12  | 33.38 $\pm$ 2.07  | 58.65 $\pm$ 7.06  | 75.47 $\pm$ 2.96                   | 95.31 $\pm$ 0.38                   |
|               | bird                           | 65.19 $\pm$ 1.49 | 66.77 $\pm$ 1.25 | 66.01 $\pm$ 0.78  | 68.30 $\pm$ 1.80  | 48.27 $\pm$ 2.65  | 57.91 $\pm$ 1.95                   | 75.40 $\pm$ 1.94                   |
|               | cat                            | 59.19 $\pm$ 1.74 | 52.70 $\pm$ 1.69 | 59.72 $\pm$ 1.09  | 57.74 $\pm$ 1.17  | 49.26 $\pm$ 3.83  | 57.04 $\pm$ 2.65                   | 73.91 $\pm$ 0.55                   |
|               | deer                           | 61.16 $\pm$ 2.54 | 68.57 $\pm$ 2.20 | 62.22 $\pm$ 3.42  | 69.09 $\pm$ 2.04  | 52.72 $\pm$ 5.71  | 64.60 $\pm$ 2.48                   | 84.09 $\pm$ 1.39                   |
|               | dog                            | 55.86 $\pm$ 2.06 | 51.57 $\pm$ 0.68 | 60.85 $\pm$ 1.01  | 55.28 $\pm$ 1.74  | 52.67 $\pm$ 3.55  | 62.28 $\pm$ 2.57                   | 87.88 $\pm$ 1.32                   |
|               | frog                           | 49.96 $\pm$ 3.02 | 61.70 $\pm$ 0.69 | 46.00 $\pm$ 1.30  | 57.31 $\pm$ 3.26  | 64.59 $\pm$ 2.15  | 66.89 $\pm$ 4.23                   | 84.98 $\pm$ 1.02                   |
|               | horse                          | 49.05 $\pm$ 1.78 | 46.81 $\pm$ 0.84 | 52.00 $\pm$ 1.25  | 48.72 $\pm$ 0.81  | 55.46 $\pm$ 5.33  | 77.00 $\pm$ 2.23                   | 93.38 $\pm$ 1.00                   |
|               | ship                           | 72.79 $\pm$ 2.31 | 67.66 $\pm$ 1.23 | 72.59 $\pm$ 1.21  | 70.06 $\pm$ 2.51  | 55.48 $\pm$ 5.76  | 73.07 $\pm$ 3.10                   | 92.34 $\pm$ 0.89                   |
|               | truck                          | 37.94 $\pm$ 1.37 | 32.35 $\pm$ 2.63 | 38.69 $\pm$ 3.16  | 34.25 $\pm$ 3.42  | 61.91 $\pm$ 4.75  | 75.17 $\pm$ 2.24                   | 89.74 $\pm$ 1.14                   |
|               | <i>average</i>                 | 56.22 $\pm$ 0.79 | 54.25 $\pm$ 0.28 | 56.97 $\pm$ 0.46  | 55.85 $\pm$ 0.64  | 55.12 $\pm$ 1.76  | 66.74 $\pm$ 0.32                   | <b>85.65 <math>\pm</math> 0.42</b> |
| CIFAR100      | aquatic mammals                | 63.71 $\pm$ 2.30 | 63.77 $\pm$ 1.73 | 67.14 $\pm$ 2.66  | 66.63 $\pm$ 2.18  | 49.93 $\pm$ 6.68  | 55.26 $\pm$ 3.29                   | 77.22 $\pm$ 1.56                   |
|               | fish                           | 65.17 $\pm$ 2.02 | 60.19 $\pm$ 1.34 | 63.22 $\pm$ 1.13  | 62.06 $\pm$ 1.51  | 44.59 $\pm$ 3.47  | 57.57 $\pm$ 1.83                   | 70.32 $\pm$ 2.41                   |
|               | flowers                        | 38.88 $\pm$ 2.59 | 36.27 $\pm$ 1.72 | 37.21 $\pm$ 1.85  | 37.51 $\pm$ 5.36  | 66.02 $\pm$ 10.09 | 54.31 $\pm$ 1.76                   | 79.04 $\pm$ 2.54                   |
|               | food containers                | 60.73 $\pm$ 4.23 | 59.80 $\pm$ 2.64 | 61.84 $\pm$ 0.43  | 60.11 $\pm$ 1.53  | 46.68 $\pm$ 3.95  | 52.21 $\pm$ 3.19                   | 83.32 $\pm$ 0.98                   |
|               | fruit and vegetables           | 55.21 $\pm$ 4.32 | 45.63 $\pm$ 0.86 | 53.41 $\pm$ 2.24  | 48.58 $\pm$ 3.19  | 65.91 $\pm$ 2.93  | 53.69 $\pm$ 3.10                   | 78.31 $\pm$ 1.05                   |
|               | household electrical devices   | 52.16 $\pm$ 1.47 | 44.09 $\pm$ 2.21 | 56.95 $\pm$ 1.88  | 49.75 $\pm$ 1.88  | 50.11 $\pm$ 1.26  | 48.73 $\pm$ 4.67                   | 64.23 $\pm$ 2.02                   |
|               | household furniture            | 59.73 $\pm$ 4.97 | 53.85 $\pm$ 2.90 | 66.22 $\pm$ 2.04  | 56.15 $\pm$ 3.38  | 50.62 $\pm$ 7.51  | 50.67 $\pm$ 2.93                   | 82.26 $\pm$ 0.93                   |
|               | inserts                        | 46.31 $\pm$ 0.92 | 50.45 $\pm$ 1.82 | 46.26 $\pm$ 2.11  | 48.20 $\pm$ 2.68  | 51.36 $\pm$ 1.29  | 52.93 $\pm$ 2.99                   | 76.14 $\pm$ 0.92                   |
|               | large carnivores               | 50.41 $\pm$ 2.65 | 55.42 $\pm$ 2.76 | 54.01 $\pm$ 2.75  | 58.02 $\pm$ 4.39  | 59.22 $\pm$ 3.13  | 61.47 $\pm$ 3.48                   | 87.59 $\pm$ 1.34                   |
|               | large man-made outdoor things  | 65.53 $\pm$ 3.69 | 63.06 $\pm$ 3.87 | 70.15 $\pm$ 4.05  | 66.28 $\pm$ 4.59  | 57.15 $\pm$ 9.20  | 67.45 $\pm$ 2.07                   | 88.67 $\pm$ 2.38                   |
|               | large natural outdoor scenes   | 83.36 $\pm$ 1.74 | 82.40 $\pm$ 2.64 | 80.88 $\pm$ 0.96  | 82.01 $\pm$ 2.28  | 51.37 $\pm$ 6.78  | 62.61 $\pm$ 2.48                   | 85.93 $\pm$ 0.65                   |
|               | large omnivores and herbivores | 51.13 $\pm$ 3.09 | 51.06 $\pm$ 3.35 | 56.66 $\pm$ 1.77  | 56.04 $\pm$ 3.43  | 57.51 $\pm$ 1.90  | 55.61 $\pm$ 0.85                   | 83.65 $\pm$ 0.69                   |
|               | medium-sized mammals           | 58.80 $\pm$ 2.47 | 57.48 $\pm$ 1.80 | 62.64 $\pm$ 2.64  | 63.09 $\pm$ 3.76  | 61.02 $\pm$ 2.59  | 58.72 $\pm$ 2.98                   | 84.72 $\pm$ 1.08                   |
|               | non-insert invertebrates       | 52.91 $\pm$ 1.39 | 57.02 $\pm$ 1.97 | 50.59 $\pm$ 0.92  | 54.87 $\pm$ 0.77  | 49.94 $\pm$ 2.39  | 49.14 $\pm$ 0.57                   | 63.87 $\pm$ 1.65                   |
|               | people                         | 46.69 $\pm$ 1.61 | 39.44 $\pm$ 2.70 | 47.94 $\pm$ 1.95  | 42.20 $\pm$ 2.74  | 56.84 $\pm$ 2.61  | 56.42 $\pm$ 3.45                   | 90.61 $\pm$ 0.93                   |
|               | reptiles                       | 54.38 $\pm$ 1.44 | 55.95 $\pm$ 2.71 | 53.88 $\pm$ 0.65  | 56.69 $\pm$ 2.82  | 48.79 $\pm$ 2.97  | 52.66 $\pm$ 1.96                   | 69.78 $\pm$ 3.44                   |
|               | small mammals                  | 59.34 $\pm$ 2.09 | 62.87 $\pm$ 0.70 | 62.37 $\pm$ 2.23  | 64.68 $\pm$ 1.14  | 54.79 $\pm$ 3.84  | 57.95 $\pm$ 1.80                   | 75.05 $\pm$ 0.88                   |
|               | trees                          | 62.66 $\pm$ 4.30 | 63.74 $\pm$ 3.50 | 60.81 $\pm$ 3.37  | 63.36 $\pm$ 2.66  | 58.04 $\pm$ 3.05  | 75.59 $\pm$ 2.72                   | 91.91 $\pm$ 0.57                   |
|               | vehicles 1                     | 36.04 $\pm$ 2.54 | 36.45 $\pm$ 1.35 | 37.85 $\pm$ 4.59  | 37.72 $\pm$ 3.15  | 58.24 $\pm$ 3.25  | 61.66 $\pm$ 3.38                   | 89.94 $\pm$ 0.81                   |
|               | vehicles 2                     | 48.37 $\pm$ 2.26 | 47.00 $\pm$ 0.79 | 53.43 $\pm$ 2.34  | 48.34 $\pm$ 1.41  | 49.17 $\pm$ 5.60  | 57.30 $\pm$ 5.00                   | 84.18 $\pm$ 1.60                   |
|               | <i>average</i>                 | 55.57 $\pm$ 0.60 | 54.30 $\pm$ 0.26 | 57.17 $\pm$ 0.58  | 56.11 $\pm$ 0.65  | 54.37 $\pm$ 0.51  | 57.10 $\pm$ 0.67                   | <b>80.34 <math>\pm</math> 0.20</b> |
| SVHN          | 0                              | 52.16 $\pm$ 1.67 | 60.13 $\pm$ 0.98 | 53.52 $\pm$ 1.50  | 51.90 $\pm$ 1.10  | 49.68 $\pm$ 1.87  | 78.25 $\pm$ 1.08                   | 80.95 $\pm$ 1.23                   |
|               | 1                              | 54.74 $\pm$ 1.59 | 61.06 $\pm$ 0.59 | 55.20 $\pm$ 1.72  | 58.03 $\pm$ 0.92  | 48.28 $\pm$ 1.32  | 69.28 $\pm$ 2.99                   | 78.02 $\pm$ 0.85                   |
|               | 2                              | 51.42 $\pm$ 1.24 | 53.94 $\pm$ 0.94 | 49.88 $\pm$ 0.65  | 51.87 $\pm$ 0.81  | 49.57 $\pm$ 1.11  | 78.31 $\pm$ 2.61                   | 93.12 $\pm$ 0.38                   |
|               | 3                              | 50.09 $\pm$ 0.85 | 52.51 $\pm$ 0.65 | 49.37 $\pm$ 0.61  | 50.10 $\pm$ 0.94  | 50.41 $\pm$ 0.55  | 71.82 $\pm$ 2.49                   | 89.39 $\pm$ 0.61                   |
|               | 4                              | 52.34 $\pm$ 1.45 | 56.98 $\pm$ 1.29 | 52.45 $\pm$ 0.96  | 53.25 $\pm$ 0.97  | 49.47 $\pm$ 1.55  | 76.67 $\pm$ 2.47                   | 94.01 $\pm$ 0.19                   |
|               | 5                              | 49.42 $\pm$ 1.24 | 52.68 $\pm$ 0.77 | 48.55 $\pm$ 1.34  | 50.18 $\pm$ 0.87  | 51.16 $\pm$ 0.67  | 75.18 $\pm$ 2.50                   | 93.25 $\pm$ 0.35                   |
|               | 6                              | 49.71 $\pm$ 0.98 | 52.21 $\pm$ 0.66 | 47.65 $\pm$ 0.73  | 50.00 $\pm$ 0.69  | 48.64 $\pm$ 1.31  | 79.73 $\pm$ 1.72                   | 91.70 $\pm$ 0.48                   |
|               | 7                              | 54.28 $\pm$ 1.94 | 57.62 $\pm$ 1.32 | 52.22 $\pm$ 1.29  | 54.47 $\pm$ 1.82  | 49.59 $\pm$ 1.57  | 84.72 $\pm$ 0.62                   | 95.03 $\pm$ 0.19                   |
|               | 8                              | 50.13 $\pm$ 1.34 | 53.90 $\pm$ 1.09 | 48.94 $\pm$ 1.77  | 50.78 $\pm$ 1.53  | 49.54 $\pm$ 1.57  | 68.04 $\pm$ 2.50                   | 81.39 $\pm$ 1.24                   |
|               | 9                              | 50.17 $\pm$ 0.77 | 52.86 $\pm$ 1.72 | 48.58 $\pm$ 0.36  | 51.21 $\pm$ 1.06  | 50.46 $\pm$ 1.28  | 80.24 $\pm$ 1.37                   | 92.17 $\pm$ 0.73                   |
|               | <i>average</i>                 | 51.45 $\pm$ 0.27 | 55.39 $\pm$ 0.46 | 50.64 $\pm$ 0.41  | 52.18 $\pm$ 0.15  | 49.68 $\pm$ 0.46  | 76.22 $\pm$ 0.31                   | <b>88.90 <math>\pm</math> 0.24</b> |

Table 2: AUROC (%) when  $\rho = 0.1$ 

| Dataset       | Class name                     | CAE              | CAE-IF           | DRAE              | RDAE             | DAGMM             | SSD-IF           | $E^3$ Outlier                      |
|---------------|--------------------------------|------------------|------------------|-------------------|------------------|-------------------|------------------|------------------------------------|
| MNIST         | 0                              | 57.50 $\pm$ 5.33 | 90.19 $\pm$ 2.19 | 61.86 $\pm$ 13.38 | 62.51 $\pm$ 5.83 | 74.52 $\pm$ 26.99 | 90.90 $\pm$ 1.01 | 94.38 $\pm$ 0.28                   |
|               | 1                              | 99.09 $\pm$ 0.16 | 99.27 $\pm$ 0.14 | 81.80 $\pm$ 7.54  | 99.19 $\pm$ 0.08 | 89.23 $\pm$ 15.65 | 96.59 $\pm$ 0.42 | 95.22 $\pm$ 0.33                   |
|               | 2                              | 53.78 $\pm$ 5.92 | 74.54 $\pm$ 1.23 | 56.94 $\pm$ 5.53  | 61.12 $\pm$ 1.81 | 48.74 $\pm$ 10.55 | 91.70 $\pm$ 1.08 | 93.07 $\pm$ 0.35                   |
|               | 3                              | 61.16 $\pm$ 6.48 | 81.80 $\pm$ 2.60 | 67.41 $\pm$ 5.25  | 65.91 $\pm$ 1.84 | 50.51 $\pm$ 3.41  | 95.61 $\pm$ 0.87 | 97.20 $\pm$ 0.29                   |
|               | 4                              | 69.94 $\pm$ 3.91 | 83.30 $\pm$ 2.22 | 66.22 $\pm$ 4.98  | 76.05 $\pm$ 1.20 | 62.22 $\pm$ 8.78  | 95.81 $\pm$ 0.82 | 95.64 $\pm$ 0.30                   |
|               | 5                              | 60.38 $\pm$ 0.49 | 79.06 $\pm$ 1.11 | 64.34 $\pm$ 3.64  | 65.11 $\pm$ 2.43 | 52.77 $\pm$ 5.37  | 92.77 $\pm$ 1.28 | 91.72 $\pm$ 0.54                   |
|               | 6                              | 73.47 $\pm$ 4.88 | 91.10 $\pm$ 0.91 | 74.66 $\pm$ 5.53  | 75.03 $\pm$ 1.94 | 66.57 $\pm$ 11.11 | 97.53 $\pm$ 0.08 | 96.79 $\pm$ 0.12                   |
|               | 7                              | 81.79 $\pm$ 2.46 | 91.90 $\pm$ 0.93 | 77.47 $\pm$ 3.57  | 85.64 $\pm$ 1.11 | 75.49 $\pm$ 10.55 | 93.89 $\pm$ 0.83 | 93.30 $\pm$ 0.21                   |
|               | 8                              | 48.20 $\pm$ 1.78 | 73.93 $\pm$ 2.57 | 48.75 $\pm$ 5.28  | 51.38 $\pm$ 2.30 | 56.98 $\pm$ 8.17  | 87.80 $\pm$ 1.49 | 88.51 $\pm$ 0.99                   |
|               | 9                              | 74.61 $\pm$ 1.90 | 89.92 $\pm$ 1.16 | 69.50 $\pm$ 16.65 | 75.71 $\pm$ 2.60 | 63.08 $\pm$ 4.61  | 95.76 $\pm$ 0.54 | 95.12 $\pm$ 0.34                   |
|               | <i>average</i>                 | 67.99 $\pm$ 0.70 | 85.50 $\pm$ 0.53 | 66.90 $\pm$ 2.55  | 71.76 $\pm$ 0.99 | 64.01 $\pm$ 3.70  | 93.84 $\pm$ 0.32 | <b>94.09 <math>\pm</math> 0.13</b> |
| Fashion-MNIST | t-shirt                        | 57.17 $\pm$ 6.39 | 85.55 $\pm$ 0.94 | 61.27 $\pm$ 6.82  | 70.56 $\pm$ 4.18 | 58.67 $\pm$ 13.52 | 88.09 $\pm$ 0.76 | 92.55 $\pm$ 0.43                   |
|               | trouser                        | 96.05 $\pm$ 0.30 | 96.34 $\pm$ 0.55 | 76.73 $\pm$ 13.97 | 96.94 $\pm$ 0.36 | 74.20 $\pm$ 12.80 | 97.82 $\pm$ 0.42 | 98.12 $\pm$ 0.16                   |
|               | pullover                       | 60.73 $\pm$ 2.57 | 82.82 $\pm$ 1.33 | 61.55 $\pm$ 3.28  | 68.79 $\pm$ 4.73 | 52.09 $\pm$ 16.12 | 89.41 $\pm$ 0.97 | 91.86 $\pm$ 0.90                   |
|               | dress                          | 77.34 $\pm$ 1.80 | 85.22 $\pm$ 0.70 | 75.43 $\pm$ 3.23  | 79.12 $\pm$ 3.22 | 73.04 $\pm$ 23.18 | 91.00 $\pm$ 0.71 | 89.99 $\pm$ 0.84                   |
|               | coat                           | 67.42 $\pm$ 2.27 | 82.68 $\pm$ 1.05 | 60.42 $\pm$ 3.50  | 73.23 $\pm$ 1.59 | 49.92 $\pm$ 14.90 | 89.95 $\pm$ 0.37 | 91.41 $\pm$ 0.44                   |
|               | sandal                         | 73.94 $\pm$ 4.21 | 67.28 $\pm$ 2.28 | 72.57 $\pm$ 4.08  | 73.64 $\pm$ 1.33 | 84.47 $\pm$ 6.00  | 88.09 $\pm$ 1.08 | 93.64 $\pm$ 0.29                   |
|               | shirt                          | 52.09 $\pm$ 3.99 | 77.53 $\pm$ 0.78 | 54.25 $\pm$ 3.28  | 66.34 $\pm$ 3.00 | 57.02 $\pm$ 7.42  | 82.06 $\pm$ 0.79 | 83.50 $\pm$ 1.15                   |
|               | sneaker                        | 91.00 $\pm$ 1.69 | 91.56 $\pm$ 0.75 | 91.69 $\pm$ 1.48  | 91.15 $\pm$ 1.14 | 75.66 $\pm$ 28.60 | 98.18 $\pm$ 0.33 | 99.11 $\pm$ 0.14                   |
|               | bag                            | 45.82 $\pm$ 3.31 | 67.18 $\pm$ 1.16 | 46.09 $\pm$ 1.75  | 51.25 $\pm$ 2.93 | 52.68 $\pm$ 7.54  | 82.36 $\pm$ 1.83 | 93.16 $\pm$ 0.38                   |
|               | ankle-boot                     | 81.37 $\pm$ 2.64 | 86.68 $\pm$ 1.47 | 71.20 $\pm$ 5.33  | 82.35 $\pm$ 5.15 | 61.76 $\pm$ 24.67 | 98.58 $\pm$ 0.27 | 99.40 $\pm$ 0.09                   |
|               | <i>average</i>                 | 70.29 $\pm$ 0.92 | 82.28 $\pm$ 0.19 | 67.12 $\pm$ 1.76  | 75.34 $\pm$ 1.19 | 63.95 $\pm$ 9.90  | 90.55 $\pm$ 0.18 | <b>93.27 <math>\pm</math> 0.14</b> |
| CIFAR10       | airplane                       | 68.34 $\pm$ 4.04 | 61.93 $\pm$ 1.11 | 71.21 $\pm$ 0.83  | 62.65 $\pm$ 2.21 | 49.29 $\pm$ 7.83  | 52.22 $\pm$ 2.43 | 78.22 $\pm$ 1.19                   |
|               | automobile                     | 37.81 $\pm$ 3.07 | 32.69 $\pm$ 1.78 | 38.41 $\pm$ 0.90  | 33.35 $\pm$ 2.22 | 61.62 $\pm$ 3.92  | 71.70 $\pm$ 2.12 | 93.78 $\pm$ 0.49                   |
|               | bird                           | 61.87 $\pm$ 4.59 | 66.43 $\pm$ 1.20 | 65.56 $\pm$ 1.06  | 66.73 $\pm$ 1.33 | 48.97 $\pm$ 4.87  | 54.23 $\pm$ 2.75 | 71.28 $\pm$ 1.36                   |
|               | cat                            | 59.15 $\pm$ 2.38 | 51.05 $\pm$ 1.14 | 59.72 $\pm$ 1.17  | 55.14 $\pm$ 2.34 | 50.61 $\pm$ 0.82  | 55.55 $\pm$ 1.78 | 70.40 $\pm$ 1.29                   |
|               | deer                           | 64.54 $\pm$ 2.29 | 70.42 $\pm$ 1.34 | 61.60 $\pm$ 1.55  | 70.94 $\pm$ 2.37 | 57.03 $\pm$ 4.41  | 64.80 $\pm$ 1.19 | 82.18 $\pm$ 0.22                   |
|               | dog                            | 57.40 $\pm$ 3.15 | 50.59 $\pm$ 1.03 | 61.05 $\pm$ 0.91  | 55.62 $\pm$ 1.20 | 54.53 $\pm$ 4.55  | 62.05 $\pm$ 2.88 | 84.80 $\pm$ 0.92                   |
|               | frog                           | 53.99 $\pm$ 4.20 | 61.93 $\pm$ 1.10 | 41.03 $\pm$ 1.32  | 56.82 $\pm$ 2.22 | 62.58 $\pm$ 5.92  | 64.62 $\pm$ 3.74 | 81.88 $\pm$ 1.55                   |
|               | horse                          | 46.49 $\pm$ 1.29 | 46.01 $\pm$ 1.32 | 50.75 $\pm$ 1.06  | 49.40 $\pm$ 1.86 | 57.27 $\pm$ 3.10  | 73.76 $\pm$ 0.94 | 91.60 $\pm$ 0.48                   |
|               | ship                           | 72.33 $\pm$ 2.63 | 66.72 $\pm$ 0.84 | 72.58 $\pm$ 1.78  | 67.77 $\pm$ 2.02 | 54.55 $\pm$ 14.22 | 68.77 $\pm$ 2.78 | 92.00 $\pm$ 0.16                   |
|               | truck                          | 36.39 $\pm$ 2.79 | 33.26 $\pm$ 1.49 | 38.24 $\pm$ 1.54  | 35.98 $\pm$ 1.67 | 64.36 $\pm$ 7.05  | 72.27 $\pm$ 1.77 | 89.19 $\pm$ 0.78                   |
|               | <i>average</i>                 | 55.83 $\pm$ 1.37 | 54.10 $\pm$ 0.11 | 56.01 $\pm$ 0.10  | 55.44 $\pm$ 0.58 | 56.08 $\pm$ 2.00  | 64.00 $\pm$ 0.30 | <b>83.53 <math>\pm</math> 0.29</b> |
| CIFAR100      | aquatic mammals                | 64.21 $\pm$ 3.67 | 61.34 $\pm$ 0.70 | 65.61 $\pm$ 2.19  | 63.76 $\pm$ 1.16 | 49.45 $\pm$ 2.51  | 54.87 $\pm$ 1.73 | 75.45 $\pm$ 2.51                   |
|               | fish                           | 63.53 $\pm$ 3.38 | 57.71 $\pm$ 1.17 | 64.65 $\pm$ 1.38  | 60.61 $\pm$ 2.92 | 43.67 $\pm$ 3.19  | 56.08 $\pm$ 1.51 | 69.72 $\pm$ 1.69                   |
|               | flowers                        | 37.26 $\pm$ 9.90 | 38.46 $\pm$ 1.95 | 35.15 $\pm$ 1.80  | 36.16 $\pm$ 4.81 | 64.37 $\pm$ 6.98  | 55.77 $\pm$ 1.87 | 77.44 $\pm$ 0.72                   |
|               | food containers                | 61.06 $\pm$ 5.31 | 57.61 $\pm$ 1.67 | 63.25 $\pm$ 0.96  | 59.11 $\pm$ 2.01 | 50.12 $\pm$ 2.28  | 48.60 $\pm$ 2.97 | 80.03 $\pm$ 1.44                   |
|               | fruit and vegetables           | 50.21 $\pm$ 4.25 | 42.54 $\pm$ 1.95 | 53.08 $\pm$ 1.97  | 41.96 $\pm$ 5.07 | 62.67 $\pm$ 7.49  | 53.85 $\pm$ 2.59 | 76.17 $\pm$ 1.38                   |
|               | household electrical devices   | 52.50 $\pm$ 3.31 | 43.65 $\pm$ 0.47 | 52.18 $\pm$ 5.58  | 46.37 $\pm$ 2.02 | 48.37 $\pm$ 2.48  | 49.04 $\pm$ 0.97 | 63.25 $\pm$ 2.31                   |
|               | household furniture            | 59.89 $\pm$ 4.51 | 52.25 $\pm$ 1.04 | 62.48 $\pm$ 1.68  | 53.67 $\pm$ 2.66 | 52.23 $\pm$ 4.69  | 46.60 $\pm$ 1.03 | 80.08 $\pm$ 0.98                   |
|               | inserts                        | 48.57 $\pm$ 2.52 | 52.56 $\pm$ 2.03 | 46.68 $\pm$ 1.27  | 49.33 $\pm$ 4.21 | 49.26 $\pm$ 2.34  | 52.70 $\pm$ 0.83 | 72.60 $\pm$ 0.94                   |
|               | large carnivores               | 54.25 $\pm$ 3.41 | 57.01 $\pm$ 2.21 | 50.74 $\pm$ 2.87  | 59.44 $\pm$ 3.12 | 61.05 $\pm$ 0.75  | 61.26 $\pm$ 3.29 | 86.23 $\pm$ 1.09                   |
|               | large man-made outdoor things  | 65.25 $\pm$ 3.51 | 63.03 $\pm$ 1.13 | 66.00 $\pm$ 2.66  | 67.77 $\pm$ 1.29 | 65.50 $\pm$ 6.67  | 62.01 $\pm$ 1.11 | 88.44 $\pm$ 1.03                   |
|               | large natural outdoor scenes   | 76.84 $\pm$ 8.52 | 81.77 $\pm$ 2.56 | 82.53 $\pm$ 0.93  | 79.70 $\pm$ 4.07 | 56.33 $\pm$ 5.02  | 61.26 $\pm$ 2.72 | 85.05 $\pm$ 1.21                   |
|               | large omnivores and herbivores | 53.57 $\pm$ 1.32 | 53.13 $\pm$ 1.11 | 55.69 $\pm$ 1.14  | 59.60 $\pm$ 2.37 | 59.10 $\pm$ 2.18  | 57.03 $\pm$ 3.32 | 83.02 $\pm$ 0.87                   |
|               | medium-sized mammals           | 59.30 $\pm$ 3.97 | 57.63 $\pm$ 1.16 | 56.93 $\pm$ 1.21  | 61.60 $\pm$ 2.32 | 61.95 $\pm$ 2.64  | 58.56 $\pm$ 2.35 | 82.99 $\pm$ 0.50                   |
|               | non-insert invertebrates       | 52.15 $\pm$ 1.83 | 58.10 $\pm$ 0.90 | 51.55 $\pm$ 0.74  | 53.07 $\pm$ 1.33 | 47.09 $\pm$ 2.04  | 50.52 $\pm$ 1.38 | 62.62 $\pm$ 1.52                   |
|               | people                         | 47.10 $\pm$ 2.76 | 38.68 $\pm$ 0.70 | 47.47 $\pm$ 1.57  | 45.05 $\pm$ 1.35 | 54.60 $\pm$ 2.37  | 53.95 $\pm$ 2.20 | 89.23 $\pm$ 0.51                   |
|               | reptiles                       | 55.48 $\pm$ 0.85 | 57.29 $\pm$ 1.18 | 54.41 $\pm$ 1.35  | 56.80 $\pm$ 0.62 | 49.98 $\pm$ 1.71  | 52.28 $\pm$ 2.20 | 70.09 $\pm$ 1.81                   |
|               | small mammals                  | 60.12 $\pm$ 4.90 | 63.57 $\pm$ 1.20 | 61.92 $\pm$ 1.75  | 65.07 $\pm$ 2.18 | 56.21 $\pm$ 3.30  | 55.94 $\pm$ 1.44 | 75.50 $\pm$ 1.62                   |
|               | trees                          | 57.28 $\pm$ 5.18 | 65.36 $\pm$ 1.33 | 57.70 $\pm$ 2.59  | 63.95 $\pm$ 2.67 | 59.59 $\pm$ 6.26  | 69.69 $\pm$ 4.03 | 91.66 $\pm$ 0.54                   |
|               | vehicles 1                     | 36.98 $\pm$ 1.86 | 40.56 $\pm$ 1.01 | 34.45 $\pm$ 2.06  | 39.18 $\pm$ 1.42 | 56.28 $\pm$ 1.44  | 58.32 $\pm$ 2.77 | 89.62 $\pm$ 0.62                   |
|               | vehicles 2                     | 47.82 $\pm$ 4.64 | 48.10 $\pm$ 2.26 | 49.44 $\pm$ 2.34  | 48.83 $\pm$ 1.63 | 50.36 $\pm$ 2.52  | 54.38 $\pm$ 0.38 | 84.96 $\pm$ 1.15                   |
|               | <i>average</i>                 | 55.17 $\pm$ 1.51 | 54.52 $\pm$ 0.40 | 55.59 $\pm$ 0.68  | 55.55 $\pm$ 0.81 | 54.91 $\pm$ 0.74  | 55.63 $\pm$ 0.21 | <b>79.21 <math>\pm</math> 0.29</b> |
| SVHN          | 0                              | 50.61 $\pm$ 1.80 | 58.86 $\pm$ 1.51 | 51.59 $\pm$ 1.06  | 52.16 $\pm$ 1.70 | 49.83 $\pm$ 0.99  | 78.89 $\pm$ 1.65 | 73.51 $\pm$ 1.19                   |
|               | 1                              | 56.45 $\pm$ 1.86 | 60.91 $\pm$ 1.43 | 56.54 $\pm$ 2.10  | 57.97 $\pm$ 1.86 | 49.75 $\pm$ 0.33  | 66.66 $\pm$ 1.28 | 72.50 $\pm$ 1.26                   |
|               | 2                              | 51.17 $\pm$ 0.91 | 54.70 $\pm$ 1.43 | 51.44 $\pm$ 1.34  | 52.15 $\pm$ 0.89 | 49.68 $\pm$ 1.08  | 73.45 $\pm$ 1.54 | 91.63 $\pm$ 0.45                   |
|               | 3                              | 50.51 $\pm$ 0.49 | 52.18 $\pm$ 0.58 | 49.96 $\pm$ 0.77  | 50.88 $\pm$ 0.86 | 50.95 $\pm$ 0.56  | 68.46 $\pm$ 2.44 | 87.44 $\pm$ 0.23                   |
|               | 4                              | 52.18 $\pm$ 1.50 | 56.26 $\pm$ 1.50 | 52.47 $\pm$ 0.67  | 54.94 $\pm$ 0.69 | 49.53 $\pm$ 1.33  | 70.15 $\pm$ 3.21 | 92.54 $\pm$ 0.39                   |
|               | 5                              | 49.06 $\pm$ 0.79 | 52.15 $\pm$ 1.04 | 48.49 $\pm$ 1.05  | 49.59 $\pm$ 0.87 | 50.44 $\pm$ 1.03  | 74.63 $\pm$ 3.12 | 92.05 $\pm$ 0.38                   |
|               | 6                              | 49.86 $\pm$ 1.09 | 51.21 $\pm$ 1.38 | 48.11 $\pm$ 1.01  | 50.11 $\pm$ 0.57 | 50.55 $\pm$ 1.92  | 75.12 $\pm$ 2.22 | 89.94 $\pm$ 0.37                   |
|               | 7                              | 51.91 $\pm$ 0.47 | 57.12 $\pm$ 0.92 | 53.15 $\pm$ 1.16  | 52.41 $\pm$ 1.61 | 48.85 $\pm$ 1.97  | 78.91 $\pm$ 3.34 | 93.26 $\pm$ 0.30                   |
|               | 8                              | 49.42 $\pm$ 1.40 | 53.38 $\pm$ 1.17 | 48.03 $\pm$ 1.37  | 49.79 $\pm$ 1.56 | 49.51 $\pm$ 0.68  | 69.96 $\pm$ 2.11 | 77.24 $\pm$ 2.22                   |
|               | 9                              | 50.77 $\pm$ 0.67 | 53.57 $\pm$ 0.79 | 49.83 $\pm$ 0.62  | 51.39 $\pm$ 0.51 | 50.98 $\pm$ 1.33  | 77.23 $\pm$ 1.17 | 90.00 $\pm$ 0.35                   |
|               | <i>average</i>                 | 51.20 $\pm$ 0.37 | 55.03 $\pm$ 0.67 | 50.96 $\pm$ 0.59  | 52.14 $\pm$ 0.56 | 50.00 $\pm$ 0.45  | 73.35 $\pm$ 0.62 | <b>86.01 <math>\pm</math> 0.18</b> |

Table 3: AUROC (%) when  $\rho = 0.15$ 

| Dataset       | Class name                     | CAE              | CAE-IF           | DRAE              | RDAE             | DAGMM             | SSD-IF           | $E^3$ Outlier                      |
|---------------|--------------------------------|------------------|------------------|-------------------|------------------|-------------------|------------------|------------------------------------|
| MNIST         | 0                              | 48.20 $\pm$ 5.76 | 88.03 $\pm$ 1.81 | 61.63 $\pm$ 17.32 | 54.03 $\pm$ 5.75 | 74.75 $\pm$ 24.67 | 89.48 $\pm$ 2.75 | 91.42 $\pm$ 0.29                   |
|               | 1                              | 98.75 $\pm$ 0.33 | 99.22 $\pm$ 0.14 | 87.47 $\pm$ 9.82  | 98.93 $\pm$ 0.17 | 80.34 $\pm$ 29.29 | 96.14 $\pm$ 0.61 | 91.94 $\pm$ 0.87                   |
|               | 2                              | 51.38 $\pm$ 4.00 | 71.94 $\pm$ 1.99 | 55.99 $\pm$ 6.25  | 53.31 $\pm$ 3.83 | 49.72 $\pm$ 4.39  | 89.60 $\pm$ 0.78 | 92.33 $\pm$ 0.24                   |
|               | 3                              | 55.72 $\pm$ 2.85 | 79.23 $\pm$ 2.30 | 66.26 $\pm$ 8.38  | 64.73 $\pm$ 1.44 | 56.79 $\pm$ 9.84  | 93.83 $\pm$ 0.49 | 96.89 $\pm$ 0.13                   |
|               | 4                              | 68.00 $\pm$ 2.40 | 80.53 $\pm$ 1.20 | 69.45 $\pm$ 9.19  | 72.22 $\pm$ 1.06 | 65.42 $\pm$ 11.04 | 94.38 $\pm$ 0.75 | 94.50 $\pm$ 0.32                   |
|               | 5                              | 55.61 $\pm$ 3.69 | 85.37 $\pm$ 0.98 | 58.19 $\pm$ 2.84  | 51.99 $\pm$ 6.43 | 54.14 $\pm$ 4.10  | 89.39 $\pm$ 1.09 | 90.41 $\pm$ 0.55                   |
|               | 6                              | 66.14 $\pm$ 3.38 | 88.75 $\pm$ 1.94 | 60.31 $\pm$ 11.78 | 69.38 $\pm$ 1.35 | 57.53 $\pm$ 12.61 | 96.21 $\pm$ 0.24 | 96.38 $\pm$ 0.14                   |
|               | 7                              | 75.57 $\pm$ 5.34 | 91.47 $\pm$ 0.59 | 77.40 $\pm$ 2.35  | 80.66 $\pm$ 2.86 | 62.94 $\pm$ 16.16 | 92.70 $\pm$ 1.00 | 92.49 $\pm$ 0.08                   |
|               | 8                              | 46.34 $\pm$ 4.51 | 71.36 $\pm$ 1.37 | 58.80 $\pm$ 9.70  | 49.18 $\pm$ 5.09 | 54.19 $\pm$ 5.41  | 84.48 $\pm$ 1.26 | 87.49 $\pm$ 0.94                   |
|               | 9                              | 73.01 $\pm$ 2.44 | 89.10 $\pm$ 0.87 | 69.74 $\pm$ 5.35  | 75.23 $\pm$ 3.18 | 63.72 $\pm$ 8.46  | 94.98 $\pm$ 0.53 | 94.60 $\pm$ 0.39                   |
|               | <i>average</i>                 | 63.87 $\pm$ 0.96 | 84.50 $\pm$ 0.32 | 66.52 $\pm$ 2.72  | 66.97 $\pm$ 1.77 | 61.95 $\pm$ 2.81  | 92.12 $\pm$ 0.45 | <b>92.85 <math>\pm</math> 0.15</b> |
| Fashion-MNIST | t-shirt                        | 60.61 $\pm$ 3.73 | 84.49 $\pm$ 0.56 | 64.85 $\pm$ 2.07  | 70.40 $\pm$ 3.24 | 54.69 $\pm$ 14.71 | 86.86 $\pm$ 0.40 | 92.19 $\pm$ 0.32                   |
|               | trouser                        | 95.42 $\pm$ 0.57 | 95.67 $\pm$ 0.86 | 93.12 $\pm$ 1.51  | 96.41 $\pm$ 0.56 | 51.66 $\pm$ 15.28 | 97.36 $\pm$ 0.65 | 97.48 $\pm$ 0.14                   |
|               | pullover                       | 59.83 $\pm$ 6.78 | 81.61 $\pm$ 0.66 | 60.95 $\pm$ 5.63  | 65.04 $\pm$ 6.54 | 51.20 $\pm$ 12.41 | 89.00 $\pm$ 0.63 | 91.73 $\pm$ 0.85                   |
|               | dress                          | 75.63 $\pm$ 1.67 | 82.62 $\pm$ 1.51 | 73.70 $\pm$ 1.81  | 75.31 $\pm$ 3.97 | 59.73 $\pm$ 10.67 | 89.44 $\pm$ 0.99 | 87.66 $\pm$ 1.04                   |
|               | coat                           | 64.16 $\pm$ 1.92 | 81.28 $\pm$ 1.25 | 60.31 $\pm$ 2.28  | 65.96 $\pm$ 8.46 | 53.04 $\pm$ 17.50 | 89.34 $\pm$ 0.66 | 90.74 $\pm$ 0.40                   |
|               | sandal                         | 69.33 $\pm$ 2.03 | 63.26 $\pm$ 1.67 | 72.39 $\pm$ 1.27  | 71.89 $\pm$ 4.61 | 82.14 $\pm$ 12.76 | 86.01 $\pm$ 1.63 | 92.63 $\pm$ 0.45                   |
|               | shirt                          | 51.55 $\pm$ 2.41 | 75.81 $\pm$ 0.87 | 52.37 $\pm$ 1.37  | 62.19 $\pm$ 5.14 | 49.20 $\pm$ 4.68  | 81.49 $\pm$ 0.85 | 82.85 $\pm$ 0.55                   |
|               | sneaker                        | 87.78 $\pm$ 3.06 | 90.94 $\pm$ 0.86 | 88.48 $\pm$ 2.18  | 89.97 $\pm$ 1.96 | 60.34 $\pm$ 18.65 | 98.04 $\pm$ 0.36 | 98.94 $\pm$ 0.20                   |
|               | bag                            | 43.85 $\pm$ 8.22 | 61.98 $\pm$ 1.95 | 44.98 $\pm$ 2.90  | 46.16 $\pm$ 8.05 | 47.70 $\pm$ 11.69 | 77.60 $\pm$ 2.37 | 89.44 $\pm$ 0.86                   |
|               | ankle-boot                     | 76.88 $\pm$ 4.26 | 81.43 $\pm$ 2.67 | 70.67 $\pm$ 2.30  | 78.04 $\pm$ 2.70 | 69.76 $\pm$ 12.80 | 98.12 $\pm$ 0.28 | 99.34 $\pm$ 0.08                   |
|               | <i>average</i>                 | 68.50 $\pm$ 1.66 | 79.91 $\pm$ 0.56 | 68.18 $\pm$ 0.81  | 72.14 $\pm$ 0.89 | 57.95 $\pm$ 6.79  | 89.33 $\pm$ 0.20 | <b>92.30 <math>\pm</math> 0.10</b> |
| CIFAR10       | airplane                       | 72.24 $\pm$ 3.19 | 62.41 $\pm$ 1.45 | 72.02 $\pm$ 0.77  | 64.64 $\pm$ 2.13 | 52.56 $\pm$ 6.24  | 52.05 $\pm$ 1.46 | 76.93 $\pm$ 0.48                   |
|               | automobile                     | 37.28 $\pm$ 2.39 | 32.54 $\pm$ 0.73 | 37.84 $\pm$ 1.11  | 33.26 $\pm$ 2.21 | 61.53 $\pm$ 2.87  | 70.47 $\pm$ 2.94 | 93.42 $\pm$ 0.66                   |
|               | bird                           | 61.74 $\pm$ 1.33 | 65.88 $\pm$ 0.38 | 64.73 $\pm$ 0.73  | 66.80 $\pm$ 0.89 | 46.26 $\pm$ 4.70  | 52.68 $\pm$ 1.72 | 69.16 $\pm$ 0.92                   |
|               | cat                            | 58.60 $\pm$ 1.14 | 52.07 $\pm$ 0.89 | 59.94 $\pm$ 0.46  | 55.47 $\pm$ 1.10 | 52.13 $\pm$ 2.25  | 54.22 $\pm$ 2.06 | 66.28 $\pm$ 1.22                   |
|               | deer                           | 62.84 $\pm$ 2.50 | 70.29 $\pm$ 0.73 | 62.08 $\pm$ 0.20  | 70.04 $\pm$ 1.89 | 53.80 $\pm$ 2.75  | 63.81 $\pm$ 1.51 | 80.24 $\pm$ 0.48                   |
|               | dog                            | 57.39 $\pm$ 1.72 | 50.61 $\pm$ 0.75 | 60.37 $\pm$ 1.14  | 55.09 $\pm$ 1.87 | 53.00 $\pm$ 1.99  | 62.91 $\pm$ 1.67 | 80.15 $\pm$ 1.34                   |
|               | frog                           | 52.43 $\pm$ 3.20 | 61.39 $\pm$ 0.69 | 43.62 $\pm$ 1.86  | 55.69 $\pm$ 1.91 | 60.94 $\pm$ 4.26  | 63.55 $\pm$ 1.85 | 78.37 $\pm$ 1.21                   |
|               | horse                          | 47.64 $\pm$ 0.85 | 46.02 $\pm$ 0.80 | 50.09 $\pm$ 0.81  | 48.50 $\pm$ 0.61 | 57.69 $\pm$ 4.33  | 68.98 $\pm$ 2.44 | 89.37 $\pm$ 0.86                   |
|               | ship                           | 70.92 $\pm$ 3.31 | 66.50 $\pm$ 1.01 | 72.76 $\pm$ 1.13  | 67.00 $\pm$ 5.70 | 54.72 $\pm$ 13.11 | 67.87 $\pm$ 3.79 | 90.85 $\pm$ 0.51                   |
|               | truck                          | 40.12 $\pm$ 4.11 | 32.59 $\pm$ 0.92 | 39.61 $\pm$ 0.65  | 34.06 $\pm$ 2.38 | 60.97 $\pm$ 4.48  | 69.26 $\pm$ 1.54 | 88.49 $\pm$ 0.67                   |
|               | <i>average</i>                 | 56.12 $\pm$ 0.47 | 54.03 $\pm$ 0.08 | 56.31 $\pm$ 0.22  | 55.06 $\pm$ 0.63 | 55.36 $\pm$ 0.54  | 62.58 $\pm$ 0.76 | <b>81.33 <math>\pm</math> 0.27</b> |
| CIFAR100      | aquatic mammals                | 64.76 $\pm$ 1.48 | 61.36 $\pm$ 1.32 | 65.65 $\pm$ 1.03  | 64.54 $\pm$ 0.90 | 49.52 $\pm$ 1.87  | 57.00 $\pm$ 2.34 | 74.54 $\pm$ 1.32                   |
|               | fish                           | 65.21 $\pm$ 0.92 | 58.83 $\pm$ 0.69 | 63.43 $\pm$ 0.75  | 60.55 $\pm$ 1.93 | 43.35 $\pm$ 5.10  | 56.08 $\pm$ 0.65 | 70.39 $\pm$ 0.89                   |
|               | flowers                        | 35.86 $\pm$ 3.60 | 34.66 $\pm$ 1.16 | 33.76 $\pm$ 2.31  | 35.15 $\pm$ 4.08 | 59.45 $\pm$ 9.27  | 55.77 $\pm$ 1.15 | 76.84 $\pm$ 2.26                   |
|               | food containers                | 61.67 $\pm$ 1.81 | 59.74 $\pm$ 0.59 | 60.94 $\pm$ 0.79  | 57.54 $\pm$ 2.76 | 47.03 $\pm$ 1.06  | 52.25 $\pm$ 1.91 | 77.87 $\pm$ 0.79                   |
|               | fruit and vegetables           | 52.51 $\pm$ 4.58 | 44.93 $\pm$ 1.14 | 52.60 $\pm$ 1.57  | 48.55 $\pm$ 4.36 | 58.92 $\pm$ 8.45  | 54.07 $\pm$ 2.50 | 74.51 $\pm$ 1.61                   |
|               | household electrical devices   | 52.64 $\pm$ 2.22 | 43.85 $\pm$ 0.87 | 56.27 $\pm$ 1.07  | 45.34 $\pm$ 2.26 | 51.85 $\pm$ 4.27  | 50.16 $\pm$ 1.12 | 62.57 $\pm$ 2.45                   |
|               | household furniture            | 59.55 $\pm$ 2.31 | 54.00 $\pm$ 1.83 | 64.79 $\pm$ 1.63  | 55.87 $\pm$ 2.88 | 51.45 $\pm$ 5.34  | 47.99 $\pm$ 1.41 | 78.98 $\pm$ 1.07                   |
|               | inserts                        | 49.74 $\pm$ 3.41 | 50.17 $\pm$ 1.39 | 45.83 $\pm$ 1.37  | 48.83 $\pm$ 0.98 | 49.61 $\pm$ 5.28  | 52.53 $\pm$ 1.56 | 71.86 $\pm$ 0.88                   |
|               | large carnivores               | 49.29 $\pm$ 1.79 | 54.29 $\pm$ 2.52 | 52.95 $\pm$ 1.30  | 54.58 $\pm$ 0.47 | 59.94 $\pm$ 1.74  | 59.70 $\pm$ 1.83 | 84.97 $\pm$ 2.15                   |
|               | large man-made outdoor things  | 63.75 $\pm$ 2.18 | 62.99 $\pm$ 1.15 | 69.23 $\pm$ 1.25  | 66.91 $\pm$ 2.11 | 63.31 $\pm$ 4.17  | 63.42 $\pm$ 3.07 | 88.10 $\pm$ 0.87                   |
|               | large natural outdoor scenes   | 82.94 $\pm$ 1.20 | 81.92 $\pm$ 1.35 | 80.87 $\pm$ 0.52  | 82.24 $\pm$ 1.56 | 51.00 $\pm$ 3.40  | 56.81 $\pm$ 6.28 | 83.81 $\pm$ 0.75                   |
|               | large omnivores and herbivores | 53.23 $\pm$ 1.23 | 51.65 $\pm$ 0.47 | 58.33 $\pm$ 0.78  | 56.39 $\pm$ 2.05 | 58.92 $\pm$ 2.88  | 54.93 $\pm$ 1.52 | 81.51 $\pm$ 1.31                   |
|               | medium-sized mammals           | 53.45 $\pm$ 4.20 | 55.41 $\pm$ 1.11 | 56.76 $\pm$ 1.17  | 60.14 $\pm$ 1.99 | 60.68 $\pm$ 1.91  | 57.72 $\pm$ 2.14 | 81.26 $\pm$ 1.44                   |
|               | non-insert invertebrates       | 51.75 $\pm$ 1.41 | 56.54 $\pm$ 0.83 | 49.94 $\pm$ 1.08  | 53.14 $\pm$ 0.69 | 47.63 $\pm$ 1.87  | 49.60 $\pm$ 0.85 | 59.93 $\pm$ 1.01                   |
|               | people                         | 47.20 $\pm$ 1.90 | 39.39 $\pm$ 0.75 | 48.55 $\pm$ 1.37  | 44.22 $\pm$ 1.31 | 56.19 $\pm$ 3.39  | 51.79 $\pm$ 2.71 | 88.26 $\pm$ 1.28                   |
|               | reptiles                       | 51.82 $\pm$ 1.87 | 55.31 $\pm$ 1.02 | 53.02 $\pm$ 1.52  | 55.61 $\pm$ 0.64 | 49.80 $\pm$ 2.43  | 53.97 $\pm$ 2.13 | 68.07 $\pm$ 2.21                   |
|               | small mammals                  | 59.50 $\pm$ 2.27 | 62.28 $\pm$ 1.39 | 61.31 $\pm$ 1.25  | 65.04 $\pm$ 1.78 | 55.69 $\pm$ 3.04  | 57.72 $\pm$ 2.59 | 73.37 $\pm$ 1.51                   |
|               | trees                          | 59.88 $\pm$ 2.13 | 63.23 $\pm$ 1.62 | 58.18 $\pm$ 2.71  | 62.42 $\pm$ 1.25 | 60.98 $\pm$ 5.25  | 69.51 $\pm$ 2.78 | 91.13 $\pm$ 0.80                   |
|               | vehicles 1                     | 36.12 $\pm$ 1.18 | 36.96 $\pm$ 1.09 | 37.99 $\pm$ 1.50  | 36.98 $\pm$ 1.82 | 58.17 $\pm$ 2.02  | 56.77 $\pm$ 2.47 | 89.05 $\pm$ 0.79                   |
|               | vehicles 2                     | 47.38 $\pm$ 2.69 | 45.91 $\pm$ 1.65 | 51.48 $\pm$ 1.50  | 46.81 $\pm$ 0.91 | 51.43 $\pm$ 3.29  | 52.79 $\pm$ 1.67 | 84.14 $\pm$ 0.97                   |
|               | <i>average</i>                 | 54.91 $\pm$ 0.23 | 53.67 $\pm$ 0.45 | 56.09 $\pm$ 0.45  | 55.04 $\pm$ 0.44 | 54.25 $\pm$ 0.68  | 55.53 $\pm$ 0.48 | <b>78.06 <math>\pm</math> 0.42</b> |
| SVHN          | 0                              | 51.13 $\pm$ 1.69 | 57.53 $\pm$ 0.73 | 51.67 $\pm$ 0.87  | 53.24 $\pm$ 1.27 | 49.77 $\pm$ 1.08  | 77.38 $\pm$ 2.97 | 68.03 $\pm$ 2.17                   |
|               | 1                              | 54.35 $\pm$ 1.78 | 59.87 $\pm$ 0.60 | 56.24 $\pm$ 1.61  | 56.86 $\pm$ 0.53 | 49.25 $\pm$ 0.99  | 65.39 $\pm$ 2.59 | 69.19 $\pm$ 1.81                   |
|               | 2                              | 51.19 $\pm$ 0.90 | 54.09 $\pm$ 0.90 | 51.25 $\pm$ 0.52  | 52.58 $\pm$ 1.07 | 49.50 $\pm$ 0.76  | 72.52 $\pm$ 3.46 | 90.04 $\pm$ 0.78                   |
|               | 3                              | 50.00 $\pm$ 0.67 | 51.43 $\pm$ 0.27 | 49.20 $\pm$ 0.62  | 49.85 $\pm$ 0.55 | 50.42 $\pm$ 0.46  | 67.13 $\pm$ 2.24 | 85.95 $\pm$ 0.28                   |
|               | 4                              | 52.42 $\pm$ 0.83 | 55.14 $\pm$ 1.47 | 52.84 $\pm$ 0.46  | 54.28 $\pm$ 1.09 | 49.50 $\pm$ 1.11  | 69.07 $\pm$ 1.75 | 90.45 $\pm$ 0.36                   |
|               | 5                              | 49.81 $\pm$ 0.56 | 51.99 $\pm$ 0.33 | 48.84 $\pm$ 0.56  | 50.42 $\pm$ 0.39 | 49.94 $\pm$ 0.46  | 69.14 $\pm$ 2.21 | 90.59 $\pm$ 0.19                   |
|               | 6                              | 49.28 $\pm$ 0.98 | 51.12 $\pm$ 0.52 | 47.83 $\pm$ 0.87  | 49.74 $\pm$ 0.57 | 50.01 $\pm$ 0.43  | 71.52 $\pm$ 1.43 | 87.92 $\pm$ 0.29                   |
|               | 7                              | 53.95 $\pm$ 0.97 | 56.44 $\pm$ 0.59 | 53.54 $\pm$ 0.78  | 54.45 $\pm$ 0.53 | 49.87 $\pm$ 0.78  | 77.60 $\pm$ 1.34 | 91.38 $\pm$ 0.49                   |
|               | 8                              | 49.22 $\pm$ 1.07 | 52.60 $\pm$ 1.06 | 48.46 $\pm$ 0.80  | 49.94 $\pm$ 1.10 | 50.52 $\pm$ 1.06  | 69.52 $\pm$ 2.47 | 71.38 $\pm$ 1.43                   |
|               | 9                              | 50.41 $\pm$ 0.85 | 53.13 $\pm$ 0.72 | 49.79 $\pm$ 0.59  | 51.10 $\pm$ 0.78 | 50.75 $\pm$ 1.37  | 73.13 $\pm$ 1.64 | 88.30 $\pm$ 0.56                   |
|               | <i>average</i>                 | 51.18 $\pm$ 0.38 | 54.33 $\pm$ 0.33 | 50.97 $\pm$ 0.23  | 52.24 $\pm$ 0.26 | 49.95 $\pm$ 0.25  | 71.24 $\pm$ 0.38 | <b>83.32 <math>\pm</math> 0.46</b> |

Table 4: AUROC (%) when  $\rho = 0.2$ 

| Dataset       | Class name                     | CAE              | CAE-IF           | DRAE              | RDAE             | DAGMM             | SSD-IF           | $E^3$ Outlier                      |
|---------------|--------------------------------|------------------|------------------|-------------------|------------------|-------------------|------------------|------------------------------------|
| MNIST         | 0                              | 47.40 $\pm$ 5.97 | 87.03 $\pm$ 3.48 | 57.02 $\pm$ 9.40  | 52.81 $\pm$ 6.82 | 70.39 $\pm$ 26.55 | 86.53 $\pm$ 2.71 | 89.26 $\pm$ 0.64                   |
|               | 1                              | 98.77 $\pm$ 0.21 | 99.16 $\pm$ 0.15 | 90.07 $\pm$ 12.60 | 98.78 $\pm$ 0.08 | 89.85 $\pm$ 12.77 | 94.51 $\pm$ 0.61 | 87.63 $\pm$ 1.13                   |
|               | 2                              | 49.47 $\pm$ 4.52 | 69.93 $\pm$ 2.67 | 51.93 $\pm$ 7.26  | 53.36 $\pm$ 4.15 | 50.75 $\pm$ 1.82  | 86.21 $\pm$ 1.10 | 90.71 $\pm$ 0.45                   |
|               | 3                              | 58.64 $\pm$ 4.61 | 79.21 $\pm$ 1.22 | 71.82 $\pm$ 10.77 | 62.89 $\pm$ 2.87 | 60.84 $\pm$ 10.12 | 91.24 $\pm$ 1.15 | 96.25 $\pm$ 0.09                   |
|               | 4                              | 69.64 $\pm$ 3.14 | 78.71 $\pm$ 1.41 | 70.44 $\pm$ 5.44  | 71.95 $\pm$ 2.05 | 66.32 $\pm$ 13.11 | 93.71 $\pm$ 0.35 | 92.90 $\pm$ 0.36                   |
|               | 5                              | 58.58 $\pm$ 2.31 | 72.34 $\pm$ 1.30 | 57.21 $\pm$ 4.44  | 58.67 $\pm$ 2.29 | 54.22 $\pm$ 2.29  | 88.67 $\pm$ 0.66 | 88.73 $\pm$ 0.71                   |
|               | 6                              | 62.92 $\pm$ 1.65 | 87.52 $\pm$ 2.09 | 63.89 $\pm$ 8.90  | 65.40 $\pm$ 3.01 | 72.08 $\pm$ 15.48 | 95.03 $\pm$ 0.81 | 95.75 $\pm$ 0.12                   |
|               | 7                              | 78.79 $\pm$ 3.42 | 88.67 $\pm$ 0.88 | 74.75 $\pm$ 7.94  | 80.94 $\pm$ 1.13 | 76.95 $\pm$ 8.80  | 91.57 $\pm$ 0.84 | 91.76 $\pm$ 0.29                   |
|               | 8                              | 44.17 $\pm$ 2.43 | 66.18 $\pm$ 1.89 | 65.30 $\pm$ 6.30  | 51.03 $\pm$ 2.28 | 55.42 $\pm$ 11.44 | 83.32 $\pm$ 0.73 | 86.00 $\pm$ 0.80                   |
|               | 9                              | 71.28 $\pm$ 1.91 | 86.47 $\pm$ 1.87 | 70.10 $\pm$ 5.64  | 74.20 $\pm$ 1.39 | 61.99 $\pm$ 9.79  | 93.86 $\pm$ 0.66 | 94.14 $\pm$ 0.29                   |
| Fashion-MNIST | average                        | 63.97 $\pm$ 1.00 | 81.52 $\pm$ 0.86 | 67.25 $\pm$ 2.07  | 67.00 $\pm$ 0.69 | 65.88 $\pm$ 2.89  | 90.46 $\pm$ 0.28 | <b>91.31 <math>\pm</math> 0.16</b> |
|               | t-shirt                        | 52.15 $\pm$ 7.19 | 82.04 $\pm$ 1.37 | 60.33 $\pm$ 4.96  | 70.86 $\pm$ 2.05 | 62.36 $\pm$ 19.64 | 86.52 $\pm$ 0.65 | 90.76 $\pm$ 0.48                   |
|               | trouser                        | 94.83 $\pm$ 0.63 | 94.72 $\pm$ 0.27 | 90.36 $\pm$ 4.71  | 95.39 $\pm$ 0.93 | 77.39 $\pm$ 14.51 | 96.88 $\pm$ 0.45 | 96.68 $\pm$ 0.18                   |
|               | pullover                       | 57.76 $\pm$ 2.09 | 79.12 $\pm$ 1.32 | 59.91 $\pm$ 2.98  | 68.59 $\pm$ 3.36 | 41.03 $\pm$ 9.34  | 87.98 $\pm$ 0.42 | 91.37 $\pm$ 0.48                   |
|               | dress                          | 69.04 $\pm$ 4.36 | 80.17 $\pm$ 0.87 | 75.28 $\pm$ 1.84  | 74.12 $\pm$ 2.56 | 82.69 $\pm$ 3.28  | 86.21 $\pm$ 1.13 | 84.58 $\pm$ 0.47                   |
|               | coat                           | 65.55 $\pm$ 3.46 | 80.29 $\pm$ 1.56 | 58.62 $\pm$ 2.87  | 67.29 $\pm$ 5.13 | 46.52 $\pm$ 18.72 | 89.05 $\pm$ 0.45 | 90.61 $\pm$ 0.51                   |
|               | sandal                         | 62.53 $\pm$ 6.39 | 59.14 $\pm$ 1.43 | 69.98 $\pm$ 3.09  | 62.00 $\pm$ 6.63 | 83.05 $\pm$ 4.82  | 83.26 $\pm$ 2.43 | 91.09 $\pm$ 0.85                   |
|               | shirt                          | 50.44 $\pm$ 2.45 | 74.77 $\pm$ 0.56 | 52.79 $\pm$ 2.50  | 60.30 $\pm$ 2.39 | 53.22 $\pm$ 9.40  | 79.89 $\pm$ 0.88 | 82.48 $\pm$ 0.37                   |
|               | sneaker                        | 82.19 $\pm$ 3.95 | 88.60 $\pm$ 0.41 | 78.41 $\pm$ 15.06 | 88.90 $\pm$ 1.83 | 84.25 $\pm$ 8.10  | 97.79 $\pm$ 0.16 | 98.84 $\pm$ 0.14                   |
|               | bag                            | 42.24 $\pm$ 2.63 | 57.68 $\pm$ 1.73 | 42.94 $\pm$ 1.61  | 44.93 $\pm$ 3.49 | 56.85 $\pm$ 15.87 | 71.45 $\pm$ 0.97 | 86.17 $\pm$ 0.77                   |
| CIFAR10       | ankle-boot                     | 67.66 $\pm$ 4.45 | 81.51 $\pm$ 1.88 | 68.61 $\pm$ 6.88  | 77.06 $\pm$ 3.55 | 72.69 $\pm$ 16.26 | 97.33 $\pm$ 0.26 | 99.19 $\pm$ 0.03                   |
|               | average                        | 64.44 $\pm$ 1.81 | 77.81 $\pm$ 0.61 | 65.72 $\pm$ 1.93  | 70.94 $\pm$ 1.13 | 66.00 $\pm$ 4.96  | 87.64 $\pm$ 0.28 | <b>91.18 <math>\pm</math> 0.15</b> |
|               | airplane                       | 65.69 $\pm$ 6.20 | 61.96 $\pm$ 0.66 | 71.06 $\pm$ 0.78  | 63.37 $\pm$ 4.40 | 49.73 $\pm$ 6.13  | 51.10 $\pm$ 2.74 | 75.91 $\pm$ 0.40                   |
|               | automobile                     | 39.08 $\pm$ 4.45 | 32.72 $\pm$ 0.94 | 37.67 $\pm$ 1.04  | 31.94 $\pm$ 1.36 | 61.93 $\pm$ 2.17  | 66.55 $\pm$ 3.87 | 92.74 $\pm$ 0.59                   |
|               | bird                           | 62.61 $\pm$ 2.37 | 65.86 $\pm$ 0.69 | 65.49 $\pm$ 0.57  | 67.51 $\pm$ 0.82 | 47.19 $\pm$ 5.58  | 53.55 $\pm$ 2.95 | 66.29 $\pm$ 1.05                   |
|               | cat                            | 58.02 $\pm$ 2.31 | 51.92 $\pm$ 0.86 | 58.95 $\pm$ 0.44  | 54.70 $\pm$ 2.24 | 53.12 $\pm$ 1.50  | 53.53 $\pm$ 3.16 | 61.47 $\pm$ 2.24                   |
|               | deer                           | 62.10 $\pm$ 2.45 | 69.89 $\pm$ 0.64 | 62.16 $\pm$ 0.93  | 70.11 $\pm$ 0.72 | 52.27 $\pm$ 5.44  | 61.49 $\pm$ 2.07 | 78.33 $\pm$ 1.00                   |
|               | dog                            | 55.38 $\pm$ 2.20 | 50.49 $\pm$ 0.67 | 59.97 $\pm$ 0.36  | 54.66 $\pm$ 0.72 | 54.45 $\pm$ 4.28  | 60.45 $\pm$ 1.55 | 77.15 $\pm$ 1.95                   |
|               | frog                           | 49.61 $\pm$ 4.28 | 61.16 $\pm$ 0.35 | 42.92 $\pm$ 1.63  | 53.48 $\pm$ 2.49 | 57.74 $\pm$ 6.99  | 61.52 $\pm$ 1.93 | 75.79 $\pm$ 1.52                   |
|               | horse                          | 45.86 $\pm$ 1.46 | 45.20 $\pm$ 0.77 | 48.87 $\pm$ 0.70  | 46.02 $\pm$ 0.34 | 53.26 $\pm$ 8.04  | 64.63 $\pm$ 2.51 | 88.67 $\pm$ 0.63                   |
| CIFAR100      | ship                           | 70.17 $\pm$ 4.04 | 66.56 $\pm$ 0.48 | 71.49 $\pm$ 0.92  | 67.67 $\pm$ 4.57 | 51.41 $\pm$ 8.13  | 64.93 $\pm$ 2.95 | 89.85 $\pm$ 0.58                   |
|               | truck                          | 38.23 $\pm$ 2.60 | 31.77 $\pm$ 0.69 | 37.85 $\pm$ 0.65  | 32.86 $\pm$ 1.75 | 65.72 $\pm$ 6.64  | 64.38 $\pm$ 1.94 | 86.95 $\pm$ 0.46                   |
|               | average                        | 54.67 $\pm$ 1.18 | 53.75 $\pm$ 0.10 | 55.64 $\pm$ 0.32  | 54.23 $\pm$ 0.89 | 54.68 $\pm$ 0.70  | 60.21 $\pm$ 0.82 | <b>79.32 <math>\pm</math> 0.16</b> |
|               | aquatic mammals                | 65.03 $\pm$ 2.19 | 61.19 $\pm$ 1.11 | 66.23 $\pm$ 1.83  | 64.99 $\pm$ 0.88 | 51.91 $\pm$ 3.85  | 54.54 $\pm$ 2.02 | 74.42 $\pm$ 1.20                   |
|               | fish                           | 63.52 $\pm$ 2.50 | 58.95 $\pm$ 0.79 | 63.23 $\pm$ 0.99  | 60.76 $\pm$ 2.44 | 45.19 $\pm$ 2.85  | 55.70 $\pm$ 1.81 | 68.56 $\pm$ 0.91                   |
|               | flowers                        | 35.24 $\pm$ 2.94 | 34.65 $\pm$ 0.81 | 33.00 $\pm$ 1.40  | 36.57 $\pm$ 4.25 | 62.87 $\pm$ 5.93  | 53.80 $\pm$ 1.25 | 77.16 $\pm$ 1.34                   |
|               | food containers                | 60.68 $\pm$ 2.02 | 60.27 $\pm$ 0.65 | 60.56 $\pm$ 0.73  | 58.81 $\pm$ 1.93 | 42.55 $\pm$ 3.33  | 48.15 $\pm$ 2.13 | 76.41 $\pm$ 1.16                   |
|               | fruit and vegetables           | 51.40 $\pm$ 4.99 | 43.92 $\pm$ 1.18 | 52.71 $\pm$ 0.69  | 45.91 $\pm$ 2.84 | 60.61 $\pm$ 3.85  | 51.89 $\pm$ 1.39 | 73.18 $\pm$ 1.06                   |
|               | household electrical devices   | 50.91 $\pm$ 1.41 | 43.34 $\pm$ 0.49 | 55.87 $\pm$ 0.62  | 45.86 $\pm$ 2.80 | 49.73 $\pm$ 2.81  | 49.49 $\pm$ 2.28 | 60.99 $\pm$ 1.60                   |
|               | household furniture            | 58.24 $\pm$ 2.97 | 54.19 $\pm$ 0.35 | 63.86 $\pm$ 0.59  | 57.46 $\pm$ 2.15 | 47.54 $\pm$ 3.38  | 47.38 $\pm$ 1.13 | 78.01 $\pm$ 1.65                   |
| CIFAR100      | inserts                        | 48.78 $\pm$ 2.33 | 49.31 $\pm$ 1.12 | 45.02 $\pm$ 0.37  | 47.89 $\pm$ 2.27 | 49.55 $\pm$ 2.97  | 52.52 $\pm$ 1.48 | 68.89 $\pm$ 0.86                   |
|               | large carnivores               | 49.30 $\pm$ 3.77 | 53.34 $\pm$ 1.47 | 52.04 $\pm$ 1.69  | 55.09 $\pm$ 2.51 | 57.76 $\pm$ 2.22  | 56.10 $\pm$ 1.13 | 83.77 $\pm$ 1.83                   |
|               | large man-made outdoor things  | 65.23 $\pm$ 1.79 | 62.65 $\pm$ 1.85 | 68.63 $\pm$ 1.52  | 65.86 $\pm$ 1.12 | 59.61 $\pm$ 7.38  | 61.25 $\pm$ 4.10 | 87.65 $\pm$ 0.55                   |
|               | large natural outdoor scenes   | 79.64 $\pm$ 2.47 | 81.86 $\pm$ 1.04 | 79.54 $\pm$ 0.92  | 80.81 $\pm$ 2.54 | 49.87 $\pm$ 3.88  | 57.45 $\pm$ 1.92 | 83.32 $\pm$ 0.75                   |
|               | large omnivores and herbivores | 53.34 $\pm$ 2.10 | 51.87 $\pm$ 1.01 | 58.39 $\pm$ 1.23  | 57.22 $\pm$ 1.00 | 58.69 $\pm$ 2.23  | 55.98 $\pm$ 2.14 | 80.57 $\pm$ 0.71                   |
|               | medium-sized mammals           | 53.87 $\pm$ 2.03 | 55.62 $\pm$ 1.74 | 56.76 $\pm$ 1.73  | 61.91 $\pm$ 2.92 | 61.36 $\pm$ 2.37  | 58.52 $\pm$ 1.34 | 80.11 $\pm$ 1.51                   |
|               | non-insert invertebrates       | 51.48 $\pm$ 1.79 | 56.30 $\pm$ 1.18 | 49.33 $\pm$ 0.75  | 53.20 $\pm$ 1.36 | 46.49 $\pm$ 2.26  | 50.06 $\pm$ 1.73 | 59.03 $\pm$ 0.80                   |
|               | people                         | 49.22 $\pm$ 2.67 | 39.42 $\pm$ 1.51 | 48.44 $\pm$ 1.78  | 43.86 $\pm$ 1.55 | 57.82 $\pm$ 1.65  | 53.03 $\pm$ 2.78 | 88.27 $\pm$ 0.68                   |
|               | reptiles                       | 52.92 $\pm$ 0.94 | 55.67 $\pm$ 0.47 | 52.08 $\pm$ 0.92  | 55.54 $\pm$ 0.91 | 50.13 $\pm$ 1.36  | 52.40 $\pm$ 1.30 | 67.33 $\pm$ 1.33                   |
|               | small mammals                  | 59.11 $\pm$ 1.61 | 62.78 $\pm$ 0.39 | 60.75 $\pm$ 0.14  | 63.06 $\pm$ 1.19 | 53.96 $\pm$ 1.00  | 56.14 $\pm$ 1.37 | 71.88 $\pm$ 0.98                   |
| SVHN          | trees                          | 58.00 $\pm$ 3.25 | 62.55 $\pm$ 1.80 | 56.64 $\pm$ 2.11  | 60.07 $\pm$ 1.82 | 59.22 $\pm$ 3.03  | 66.21 $\pm$ 2.24 | 90.16 $\pm$ 0.33                   |
|               | vehicles 1                     | 34.41 $\pm$ 3.14 | 36.77 $\pm$ 1.07 | 36.92 $\pm$ 1.25  | 36.03 $\pm$ 1.06 | 59.11 $\pm$ 1.98  | 54.72 $\pm$ 2.86 | 88.46 $\pm$ 0.30                   |
|               | vehicles 2                     | 48.39 $\pm$ 2.44 | 46.09 $\pm$ 1.58 | 50.29 $\pm$ 1.48  | 46.99 $\pm$ 2.47 | 51.97 $\pm$ 3.31  | 50.26 $\pm$ 2.11 | 82.85 $\pm$ 1.05                   |
|               | average                        | 54.44 $\pm$ 0.92 | 53.54 $\pm$ 0.42 | 55.51 $\pm$ 0.34  | 54.89 $\pm$ 0.56 | 53.80 $\pm$ 0.61  | 54.28 $\pm$ 0.34 | <b>77.05 <math>\pm</math> 0.17</b> |
|               | 0                              | 50.47 $\pm$ 1.80 | 56.47 $\pm$ 0.90 | 50.97 $\pm$ 0.50  | 52.15 $\pm$ 0.86 | 50.33 $\pm$ 1.17  | 77.10 $\pm$ 2.23 | 62.41 $\pm$ 1.00                   |
|               | 1                              | 54.42 $\pm$ 1.08 | 59.45 $\pm$ 0.63 | 55.67 $\pm$ 0.65  | 55.82 $\pm$ 0.81 | 49.15 $\pm$ 0.57  | 63.49 $\pm$ 1.81 | 65.99 $\pm$ 0.86                   |
|               | 2                              | 50.27 $\pm$ 0.72 | 53.34 $\pm$ 0.85 | 51.04 $\pm$ 0.84  | 51.63 $\pm$ 0.74 | 49.42 $\pm$ 0.78  | 69.23 $\pm$ 2.88 | 87.90 $\pm$ 0.90                   |
|               | 3                              | 49.65 $\pm$ 0.32 | 51.32 $\pm$ 0.76 | 48.95 $\pm$ 0.26  | 50.14 $\pm$ 0.57 | 50.33 $\pm$ 0.48  | 62.81 $\pm$ 0.89 | 84.68 $\pm$ 0.54                   |
|               | 4                              | 52.21 $\pm$ 1.52 | 54.99 $\pm$ 0.55 | 52.66 $\pm$ 1.07  | 53.35 $\pm$ 0.61 | 50.53 $\pm$ 0.91  | 64.27 $\pm$ 2.93 | 88.74 $\pm$ 0.29                   |
|               | 5                              | 49.06 $\pm$ 1.05 | 51.97 $\pm$ 0.53 | 48.93 $\pm$ 0.28  | 50.10 $\pm$ 0.86 | 50.00 $\pm$ 0.73  | 67.25 $\pm$ 3.35 | 89.37 $\pm$ 0.34                   |
| SVHN          | 6                              | 49.40 $\pm$ 1.31 | 50.95 $\pm$ 0.78 | 47.72 $\pm$ 0.96  | 49.72 $\pm$ 0.40 | 49.51 $\pm$ 0.56  | 71.80 $\pm$ 1.24 | 85.78 $\pm$ 0.51                   |
|               | 7                              | 53.06 $\pm$ 0.93 | 55.60 $\pm$ 0.86 | 52.89 $\pm$ 0.48  | 53.46 $\pm$ 1.84 | 49.50 $\pm$ 1.03  | 73.55 $\pm$ 3.72 | 90.20 $\pm$ 0.36                   |
|               | 8                              | 49.22 $\pm$ 1.22 | 51.86 $\pm$ 0.46 | 48.06 $\pm$ 0.73  | 49.95 $\pm$ 0.71 | 50.04 $\pm$ 0.70  | 70.70 $\pm$ 3.10 | 68.50 $\pm$ 1.06                   |
|               | 9                              | 49.56 $\pm$ 1.09 | 54.22 $\pm$ 0.32 | 49.57 $\pm$ 0.44  | 51.18 $\pm$ 0.77 | 51.07 $\pm$ 0.56  | 72.19 $\pm$ 1.58 | 86.18 $\pm$ 0.52                   |
|               | average                        | 50.73 $\pm$ 0.38 | 54.02 $\pm$ 0.20 | 50.64 $\pm$ 0.34  | 51.75 $\pm$ 0.30 | 49.99 $\pm$ 0.24  | 69.24 $\pm$ 0.83 | <b>80.97 <math>\pm</math> 0.25</b> |



Table 5: AUROC (%) when  $\rho = 0.25$ 

| Dataset       | Class name                     | CAE              | CAE-IF           | DRAE              | RDAE             | DAGMM             | SSD-IF           | $E^3$ Outlier                      |
|---------------|--------------------------------|------------------|------------------|-------------------|------------------|-------------------|------------------|------------------------------------|
| MNIST         | 0                              | 44.50 $\pm$ 5.86 | 83.08 $\pm$ 2.45 | 61.27 $\pm$ 9.24  | 49.53 $\pm$ 3.85 | 64.22 $\pm$ 24.96 | 84.20 $\pm$ 1.42 | 85.52 $\pm$ 1.74                   |
|               | 1                              | 98.18 $\pm$ 0.96 | 98.54 $\pm$ 0.29 | 97.07 $\pm$ 0.66  | 97.75 $\pm$ 0.95 | 81.83 $\pm$ 19.71 | 93.62 $\pm$ 1.10 | 82.77 $\pm$ 0.51                   |
|               | 2                              | 46.92 $\pm$ 2.16 | 64.45 $\pm$ 2.93 | 57.49 $\pm$ 7.90  | 52.42 $\pm$ 3.46 | 45.93 $\pm$ 6.86  | 82.79 $\pm$ 1.32 | 89.74 $\pm$ 0.57                   |
|               | 3                              | 54.43 $\pm$ 3.24 | 75.92 $\pm$ 1.84 | 58.29 $\pm$ 12.36 | 58.66 $\pm$ 2.83 | 55.16 $\pm$ 7.52  | 89.35 $\pm$ 0.86 | 95.46 $\pm$ 0.49                   |
|               | 4                              | 63.21 $\pm$ 3.60 | 77.60 $\pm$ 1.80 | 62.12 $\pm$ 2.29  | 68.82 $\pm$ 2.90 | 65.82 $\pm$ 14.37 | 91.76 $\pm$ 0.37 | 92.42 $\pm$ 0.35                   |
|               | 5                              | 55.63 $\pm$ 2.30 | 71.44 $\pm$ 1.85 | 62.00 $\pm$ 12.01 | 62.65 $\pm$ 3.27 | 51.54 $\pm$ 3.39  | 84.60 $\pm$ 1.48 | 87.46 $\pm$ 0.62                   |
|               | 6                              | 60.05 $\pm$ 3.85 | 84.12 $\pm$ 1.14 | 57.92 $\pm$ 10.02 | 68.12 $\pm$ 3.35 | 59.33 $\pm$ 17.67 | 93.04 $\pm$ 0.97 | 95.13 $\pm$ 0.27                   |
|               | 7                              | 77.74 $\pm$ 2.94 | 87.58 $\pm$ 1.31 | 75.43 $\pm$ 3.23  | 80.65 $\pm$ 2.67 | 67.69 $\pm$ 10.77 | 90.24 $\pm$ 1.02 | 90.97 $\pm$ 0.15                   |
|               | 8                              | 38.03 $\pm$ 5.44 | 67.08 $\pm$ 2.50 | 44.06 $\pm$ 4.47  | 41.77 $\pm$ 1.98 | 53.44 $\pm$ 4.44  | 81.74 $\pm$ 1.37 | 84.24 $\pm$ 0.62                   |
|               | 9                              | 70.43 $\pm$ 1.83 | 85.71 $\pm$ 1.25 | 66.54 $\pm$ 8.09  | 74.04 $\pm$ 2.06 | 59.80 $\pm$ 8.80  | 93.18 $\pm$ 0.75 | 93.94 $\pm$ 0.23                   |
|               | <i>average</i>                 | 60.91 $\pm$ 0.90 | 79.55 $\pm$ 0.35 | 64.22 $\pm$ 3.40  | 65.44 $\pm$ 0.47 | 60.48 $\pm$ 2.17  | 88.45 $\pm$ 0.30 | <b>89.77 <math>\pm</math> 0.25</b> |
| Fashion-MNIST | t-shirt                        | 51.35 $\pm$ 5.03 | 82.35 $\pm$ 0.65 | 61.18 $\pm$ 7.42  | 65.58 $\pm$ 4.53 | 62.07 $\pm$ 20.08 | 85.13 $\pm$ 1.59 | 89.58 $\pm$ 0.64                   |
|               | trouser                        | 94.45 $\pm$ 0.58 | 92.85 $\pm$ 0.85 | 87.03 $\pm$ 8.43  | 95.02 $\pm$ 0.95 | 66.81 $\pm$ 11.67 | 96.06 $\pm$ 0.33 | 95.79 $\pm$ 0.30                   |
|               | pullover                       | 51.09 $\pm$ 2.75 | 79.38 $\pm$ 0.85 | 59.24 $\pm$ 2.50  | 67.71 $\pm$ 2.89 | 41.70 $\pm$ 13.02 | 87.12 $\pm$ 0.60 | 91.06 $\pm$ 0.61                   |
|               | dress                          | 70.15 $\pm$ 2.27 | 79.68 $\pm$ 0.96 | 73.83 $\pm$ 1.22  | 73.57 $\pm$ 2.90 | 53.85 $\pm$ 16.78 | 84.23 $\pm$ 1.75 | 83.23 $\pm$ 0.50                   |
|               | coat                           | 61.87 $\pm$ 6.75 | 78.71 $\pm$ 0.37 | 57.67 $\pm$ 1.63  | 67.58 $\pm$ 2.44 | 48.46 $\pm$ 9.78  | 89.15 $\pm$ 0.77 | 89.94 $\pm$ 0.22                   |
|               | sandal                         | 62.20 $\pm$ 7.20 | 57.61 $\pm$ 2.12 | 66.46 $\pm$ 2.24  | 63.48 $\pm$ 6.44 | 76.87 $\pm$ 10.95 | 79.99 $\pm$ 2.21 | 85.62 $\pm$ 0.90                   |
|               | shirt                          | 48.71 $\pm$ 2.60 | 73.97 $\pm$ 0.76 | 52.32 $\pm$ 2.02  | 62.51 $\pm$ 3.12 | 55.12 $\pm$ 5.27  | 78.60 $\pm$ 0.59 | 81.35 $\pm$ 0.20                   |
|               | sneaker                        | 82.02 $\pm$ 2.40 | 87.01 $\pm$ 0.92 | 85.73 $\pm$ 3.35  | 85.86 $\pm$ 1.50 | 73.12 $\pm$ 27.97 | 97.13 $\pm$ 0.35 | 98.77 $\pm$ 0.12                   |
|               | bag                            | 38.24 $\pm$ 6.38 | 55.94 $\pm$ 1.52 | 42.14 $\pm$ 2.58  | 40.97 $\pm$ 5.54 | 49.15 $\pm$ 8.40  | 64.85 $\pm$ 3.36 | 81.84 $\pm$ 0.79                   |
|               | ankle-boot                     | 68.29 $\pm$ 5.62 | 77.23 $\pm$ 3.00 | 67.48 $\pm$ 2.54  | 74.06 $\pm$ 3.69 | 56.02 $\pm$ 26.03 | 96.20 $\pm$ 0.50 | 98.94 $\pm$ 0.04                   |
|               | <i>average</i>                 | 62.84 $\pm$ 1.59 | 76.47 $\pm$ 0.36 | 65.31 $\pm$ 0.73  | 69.63 $\pm$ 1.72 | 58.32 $\pm$ 9.69  | 85.85 $\pm$ 0.54 | <b>89.61 <math>\pm</math> 0.55</b> |
| CIFAR10       | airplane                       | 68.18 $\pm$ 3.42 | 61.77 $\pm$ 1.12 | 70.68 $\pm$ 1.08  | 62.92 $\pm$ 3.98 | 46.75 $\pm$ 8.26  | 49.26 $\pm$ 1.13 | 73.72 $\pm$ 1.03                   |
|               | automobile                     | 37.69 $\pm$ 2.33 | 32.52 $\pm$ 0.46 | 37.49 $\pm$ 0.86  | 30.95 $\pm$ 0.42 | 62.80 $\pm$ 3.80  | 64.81 $\pm$ 2.31 | 91.29 $\pm$ 0.88                   |
|               | bird                           | 61.70 $\pm$ 1.26 | 65.92 $\pm$ 0.45 | 64.84 $\pm$ 0.24  | 66.72 $\pm$ 0.58 | 45.55 $\pm$ 2.42  | 52.59 $\pm$ 1.69 | 64.81 $\pm$ 1.59                   |
|               | cat                            | 58.12 $\pm$ 0.61 | 51.82 $\pm$ 0.70 | 59.44 $\pm$ 0.48  | 54.50 $\pm$ 1.86 | 52.10 $\pm$ 3.73  | 53.62 $\pm$ 1.06 | 57.06 $\pm$ 0.93                   |
|               | deer                           | 61.78 $\pm$ 2.55 | 69.98 $\pm$ 0.44 | 61.77 $\pm$ 1.18  | 68.40 $\pm$ 0.77 | 52.24 $\pm$ 3.50  | 60.73 $\pm$ 1.08 | 76.38 $\pm$ 1.47                   |
|               | dog                            | 55.10 $\pm$ 1.15 | 49.89 $\pm$ 0.63 | 59.59 $\pm$ 0.57  | 54.49 $\pm$ 1.02 | 56.66 $\pm$ 3.16  | 59.29 $\pm$ 2.14 | 75.80 $\pm$ 1.41                   |
|               | frog                           | 48.09 $\pm$ 2.73 | 61.07 $\pm$ 0.68 | 42.07 $\pm$ 0.69  | 55.68 $\pm$ 2.32 | 55.95 $\pm$ 5.20  | 60.45 $\pm$ 2.72 | 72.56 $\pm$ 1.72                   |
|               | horse                          | 45.19 $\pm$ 1.86 | 45.12 $\pm$ 1.04 | 49.00 $\pm$ 0.87  | 45.84 $\pm$ 1.14 | 56.45 $\pm$ 4.57  | 65.23 $\pm$ 2.53 | 86.74 $\pm$ 1.46                   |
|               | ship                           | 68.15 $\pm$ 4.72 | 66.19 $\pm$ 0.44 | 71.01 $\pm$ 0.90  | 68.99 $\pm$ 2.73 | 50.48 $\pm$ 7.22  | 63.22 $\pm$ 4.36 | 88.99 $\pm$ 0.79                   |
|               | truck                          | 38.15 $\pm$ 1.39 | 31.61 $\pm$ 0.75 | 37.87 $\pm$ 0.69  | 31.44 $\pm$ 2.13 | 61.64 $\pm$ 6.80  | 61.04 $\pm$ 1.98 | 86.41 $\pm$ 0.32                   |
|               | <i>average</i>                 | 54.21 $\pm$ 0.72 | 53.59 $\pm$ 0.12 | 55.38 $\pm$ 0.27  | 53.99 $\pm$ 0.33 | 54.06 $\pm$ 2.00  | 59.02 $\pm$ 0.77 | <b>77.37 <math>\pm</math> 0.20</b> |
| CIFAR100      | aquatic mammals                | 63.65 $\pm$ 1.99 | 61.24 $\pm$ 0.72 | 65.99 $\pm$ 0.81  | 63.20 $\pm$ 2.28 | 48.76 $\pm$ 3.15  | 54.68 $\pm$ 1.15 | 73.16 $\pm$ 0.87                   |
|               | fish                           | 65.34 $\pm$ 2.22 | 58.84 $\pm$ 1.31 | 63.35 $\pm$ 1.02  | 61.16 $\pm$ 2.23 | 42.34 $\pm$ 4.43  | 56.13 $\pm$ 3.24 | 68.24 $\pm$ 1.41                   |
|               | flowers                        | 33.31 $\pm$ 2.29 | 34.94 $\pm$ 0.93 | 32.12 $\pm$ 0.85  | 36.28 $\pm$ 3.20 | 53.53 $\pm$ 10.34 | 56.32 $\pm$ 2.77 | 74.20 $\pm$ 1.50                   |
|               | food containers                | 61.64 $\pm$ 1.71 | 59.15 $\pm$ 0.81 | 60.58 $\pm$ 0.90  | 54.74 $\pm$ 3.53 | 45.46 $\pm$ 3.91  | 49.07 $\pm$ 1.96 | 74.25 $\pm$ 1.36                   |
|               | fruit and vegetables           | 53.06 $\pm$ 4.49 | 44.35 $\pm$ 0.95 | 52.14 $\pm$ 0.78  | 47.43 $\pm$ 2.36 | 59.34 $\pm$ 3.85  | 51.83 $\pm$ 1.73 | 72.70 $\pm$ 1.01                   |
|               | household electrical devices   | 53.86 $\pm$ 1.71 | 42.74 $\pm$ 0.84 | 55.48 $\pm$ 0.81  | 45.72 $\pm$ 2.75 | 49.85 $\pm$ 4.72  | 48.92 $\pm$ 1.57 | 58.62 $\pm$ 1.37                   |
|               | household furniture            | 61.31 $\pm$ 0.40 | 52.85 $\pm$ 0.75 | 62.89 $\pm$ 0.92  | 54.10 $\pm$ 5.09 | 50.90 $\pm$ 6.71  | 45.07 $\pm$ 1.06 | 76.86 $\pm$ 0.87                   |
|               | inserts                        | 46.16 $\pm$ 2.05 | 49.31 $\pm$ 0.78 | 45.08 $\pm$ 0.77  | 46.89 $\pm$ 1.90 | 46.74 $\pm$ 3.78  | 53.48 $\pm$ 1.43 | 67.86 $\pm$ 0.70                   |
|               | large carnivores               | 49.06 $\pm$ 2.19 | 53.09 $\pm$ 1.39 | 51.08 $\pm$ 0.91  | 53.89 $\pm$ 1.63 | 58.98 $\pm$ 1.78  | 56.95 $\pm$ 2.40 | 81.59 $\pm$ 1.35                   |
|               | large man-made outdoor things  | 63.98 $\pm$ 5.13 | 62.29 $\pm$ 1.26 | 68.30 $\pm$ 1.36  | 65.69 $\pm$ 2.70 | 62.44 $\pm$ 2.67  | 57.60 $\pm$ 1.61 | 88.01 $\pm$ 0.51                   |
|               | large natural outdoor scenes   | 81.47 $\pm$ 0.92 | 81.20 $\pm$ 0.25 | 79.50 $\pm$ 0.52  | 80.08 $\pm$ 1.68 | 49.68 $\pm$ 5.38  | 59.53 $\pm$ 1.74 | 83.34 $\pm$ 0.80                   |
|               | large omnivores and herbivores | 52.35 $\pm$ 2.08 | 51.90 $\pm$ 0.73 | 56.70 $\pm$ 0.85  | 56.45 $\pm$ 1.33 | 57.75 $\pm$ 3.62  | 54.23 $\pm$ 1.16 | 80.64 $\pm$ 1.09                   |
|               | medium-sized mammals           | 55.50 $\pm$ 1.74 | 54.86 $\pm$ 0.82 | 55.15 $\pm$ 1.34  | 58.00 $\pm$ 1.76 | 58.99 $\pm$ 1.67  | 56.15 $\pm$ 1.40 | 77.84 $\pm$ 0.78                   |
|               | non-insert invertebrates       | 51.59 $\pm$ 0.66 | 56.49 $\pm$ 0.70 | 49.62 $\pm$ 0.82  | 53.54 $\pm$ 1.77 | 45.97 $\pm$ 2.21  | 49.07 $\pm$ 1.61 | 57.37 $\pm$ 1.25                   |
|               | people                         | 47.30 $\pm$ 1.64 | 38.96 $\pm$ 1.39 | 48.49 $\pm$ 1.48  | 43.11 $\pm$ 2.73 | 57.04 $\pm$ 2.56  | 51.35 $\pm$ 2.03 | 86.00 $\pm$ 0.87                   |
|               | reptiles                       | 52.25 $\pm$ 1.05 | 55.74 $\pm$ 0.41 | 52.07 $\pm$ 0.71  | 56.29 $\pm$ 1.33 | 49.14 $\pm$ 3.40  | 53.49 $\pm$ 1.24 | 67.28 $\pm$ 0.72                   |
|               | small mammals                  | 60.15 $\pm$ 1.55 | 62.96 $\pm$ 0.51 | 59.96 $\pm$ 0.99  | 64.62 $\pm$ 0.67 | 53.91 $\pm$ 2.25  | 54.96 $\pm$ 1.17 | 71.26 $\pm$ 0.52                   |
|               | trees                          | 58.89 $\pm$ 3.12 | 62.31 $\pm$ 1.14 | 56.51 $\pm$ 1.33  | 63.35 $\pm$ 1.93 | 59.46 $\pm$ 1.49  | 63.09 $\pm$ 1.23 | 90.00 $\pm$ 0.48                   |
|               | vehicles 1                     | 33.99 $\pm$ 0.89 | 36.68 $\pm$ 1.03 | 36.75 $\pm$ 1.52  | 38.95 $\pm$ 2.38 | 56.58 $\pm$ 2.49  | 52.23 $\pm$ 2.79 | 88.20 $\pm$ 0.56                   |
|               | vehicles 2                     | 47.13 $\pm$ 2.39 | 45.81 $\pm$ 0.77 | 50.12 $\pm$ 1.11  | 46.82 $\pm$ 2.45 | 49.54 $\pm$ 2.44  | 49.46 $\pm$ 2.38 | 83.05 $\pm$ 0.95                   |
|               | <i>average</i>                 | 54.60 $\pm$ 0.41 | 53.29 $\pm$ 0.37 | 55.09 $\pm$ 0.31  | 54.52 $\pm$ 0.32 | 52.82 $\pm$ 1.22  | 53.68 $\pm$ 0.76 | <b>76.02 <math>\pm</math> 0.17</b> |
| SVHN          | 0                              | 50.62 $\pm$ 0.10 | 56.24 $\pm$ 0.72 | 50.53 $\pm$ 0.80  | 52.28 $\pm$ 0.45 | 50.13 $\pm$ 0.66  | 74.71 $\pm$ 0.83 | 56.63 $\pm$ 1.28                   |
|               | 1                              | 54.99 $\pm$ 1.51 | 58.86 $\pm$ 0.51 | 55.26 $\pm$ 0.53  | 55.65 $\pm$ 1.33 | 50.11 $\pm$ 0.49  | 64.13 $\pm$ 1.88 | 63.59 $\pm$ 0.38                   |
|               | 2                              | 51.19 $\pm$ 0.82 | 52.71 $\pm$ 0.85 | 50.87 $\pm$ 0.67  | 51.81 $\pm$ 0.93 | 50.11 $\pm$ 0.58  | 65.21 $\pm$ 1.07 | 86.58 $\pm$ 0.73                   |
|               | 3                              | 49.52 $\pm$ 0.54 | 50.71 $\pm$ 0.56 | 49.11 $\pm$ 0.88  | 49.88 $\pm$ 0.44 | 50.08 $\pm$ 0.74  | 58.98 $\pm$ 3.55 | 82.94 $\pm$ 0.43                   |
|               | 4                              | 51.83 $\pm$ 0.91 | 54.57 $\pm$ 0.50 | 52.52 $\pm$ 0.63  | 53.38 $\pm$ 0.18 | 50.59 $\pm$ 0.68  | 62.90 $\pm$ 2.15 | 87.40 $\pm$ 0.91                   |
|               | 5                              | 48.61 $\pm$ 0.41 | 51.68 $\pm$ 0.63 | 48.81 $\pm$ 0.63  | 49.69 $\pm$ 0.77 | 50.67 $\pm$ 0.40  | 65.47 $\pm$ 2.63 | 88.47 $\pm$ 0.26                   |
|               | 6                              | 48.83 $\pm$ 0.74 | 50.65 $\pm$ 0.80 | 47.90 $\pm$ 1.04  | 49.14 $\pm$ 0.67 | 49.79 $\pm$ 0.47  | 68.29 $\pm$ 2.31 | 84.30 $\pm$ 0.42                   |
|               | 7                              | 53.22 $\pm$ 1.23 | 56.07 $\pm$ 0.67 | 52.14 $\pm$ 1.29  | 53.93 $\pm$ 0.56 | 49.04 $\pm$ 1.41  | 73.25 $\pm$ 2.03 | 88.79 $\pm$ 0.25                   |
|               | 8                              | 48.55 $\pm$ 0.77 | 52.08 $\pm$ 0.41 | 48.56 $\pm$ 0.96  | 50.06 $\pm$ 0.58 | 50.56 $\pm$ 0.47  | 67.52 $\pm$ 1.78 | 64.92 $\pm$ 1.14                   |
|               | 9                              | 49.48 $\pm$ 1.14 | 52.53 $\pm$ 0.94 | 49.23 $\pm$ 0.34  | 50.31 $\pm$ 0.55 | 50.94 $\pm$ 0.74  | 69.56 $\pm$ 2.29 | 84.74 $\pm$ 0.81                   |
|               | <i>average</i>                 | 50.68 $\pm$ 0.20 | 53.61 $\pm$ 0.17 | 50.49 $\pm$ 0.35  | 51.61 $\pm$ 0.17 | 50.20 $\pm$ 0.25  | 67.00 $\pm$ 0.71 | <b>78.84 <math>\pm</math> 0.26</b> |

Table 6: AUPR-in (%) (inliers as positive class) when  $\rho = 0.05$ 

| Dataset       | Class name                     | CAE              | CAE-IF           | DRAE             | RDAE             | DAGMM             | SSD-IF                             | $E^3$ Outlier                      |
|---------------|--------------------------------|------------------|------------------|------------------|------------------|-------------------|------------------------------------|------------------------------------|
| MNIST         | 0                              | 94.08 $\pm$ 0.52 | 99.58 $\pm$ 0.06 | 95.02 $\pm$ 0.68 | 96.22 $\pm$ 0.61 | 97.23 $\pm$ 2.65  | 99.55 $\pm$ 0.07                   | 99.79 $\pm$ 0.02                   |
|               | 1                              | 99.96 $\pm$ 0.00 | 99.97 $\pm$ 0.00 | 98.53 $\pm$ 1.43 | 99.97 $\pm$ 0.00 | 99.03 $\pm$ 1.13  | 99.88 $\pm$ 0.01                   | 99.82 $\pm$ 0.04                   |
|               | 2                              | 94.89 $\pm$ 0.90 | 98.21 $\pm$ 0.26 | 96.65 $\pm$ 1.86 | 95.34 $\pm$ 0.66 | 94.85 $\pm$ 1.97  | 99.68 $\pm$ 0.04                   | 99.66 $\pm$ 0.03                   |
|               | 3                              | 95.26 $\pm$ 0.32 | 99.04 $\pm$ 0.09 | 96.05 $\pm$ 1.14 | 96.33 $\pm$ 0.54 | 94.31 $\pm$ 0.82  | 99.86 $\pm$ 0.03                   | 99.87 $\pm$ 0.01                   |
|               | 4                              | 96.26 $\pm$ 0.62 | 98.94 $\pm$ 0.30 | 96.68 $\pm$ 0.94 | 96.83 $\pm$ 0.22 | 96.49 $\pm$ 0.64  | 99.78 $\pm$ 0.04                   | 99.81 $\pm$ 0.02                   |
|               | 5                              | 95.02 $\pm$ 0.50 | 98.76 $\pm$ 0.20 | 95.35 $\pm$ 0.81 | 95.93 $\pm$ 0.37 | 95.35 $\pm$ 0.65  | 99.77 $\pm$ 0.07                   | 99.62 $\pm$ 0.04                   |
|               | 6                              | 96.53 $\pm$ 0.71 | 99.41 $\pm$ 0.09 | 96.28 $\pm$ 1.45 | 97.15 $\pm$ 0.54 | 95.10 $\pm$ 1.91  | 99.92 $\pm$ 0.02                   | 99.86 $\pm$ 0.01                   |
|               | 7                              | 98.06 $\pm$ 0.41 | 99.61 $\pm$ 0.04 | 98.21 $\pm$ 0.37 | 99.00 $\pm$ 0.14 | 97.37 $\pm$ 0.89  | 99.68 $\pm$ 0.05                   | 99.67 $\pm$ 0.04                   |
|               | 8                              | 92.59 $\pm$ 1.01 | 97.99 $\pm$ 0.19 | 93.56 $\pm$ 1.22 | 93.29 $\pm$ 0.84 | 95.46 $\pm$ 0.86  | 99.31 $\pm$ 0.21                   | 99.29 $\pm$ 0.06                   |
|               | 9                              | 97.12 $\pm$ 0.57 | 99.45 $\pm$ 0.05 | 97.57 $\pm$ 0.97 | 97.70 $\pm$ 0.53 | 96.06 $\pm$ 1.24  | 99.78 $\pm$ 0.05                   | 99.74 $\pm$ 0.01                   |
| Fashion-MNIST | <i>average</i>                 | 95.98 $\pm$ 0.16 | 99.10 $\pm$ 0.04 | 96.39 $\pm$ 0.46 | 96.78 $\pm$ 0.15 | 96.13 $\pm$ 0.28  | <b>99.72 <math>\pm</math> 0.03</b> | 99.71 $\pm$ 0.01                   |
|               | t-shirt                        | 97.05 $\pm$ 0.59 | 99.19 $\pm$ 0.07 | 97.21 $\pm$ 0.95 | 98.43 $\pm$ 0.12 | 96.53 $\pm$ 1.91  | 99.41 $\pm$ 0.10                   | 99.64 $\pm$ 0.04                   |
|               | trouser                        | 99.83 $\pm$ 0.02 | 99.82 $\pm$ 0.04 | 99.09 $\pm$ 0.44 | 99.83 $\pm$ 0.02 | 96.74 $\pm$ 2.77  | 99.92 $\pm$ 0.01                   | 99.93 $\pm$ 0.01                   |
|               | pullover                       | 96.61 $\pm$ 0.99 | 98.88 $\pm$ 0.12 | 96.97 $\pm$ 0.59 | 97.89 $\pm$ 0.45 | 95.05 $\pm$ 1.85  | 99.08 $\pm$ 0.17                   | 99.24 $\pm$ 0.18                   |
|               | dress                          | 98.50 $\pm$ 0.20 | 99.17 $\pm$ 0.15 | 98.24 $\pm$ 0.28 | 98.50 $\pm$ 0.27 | 97.95 $\pm$ 1.42  | 99.43 $\pm$ 0.05                   | 99.54 $\pm$ 0.05                   |
|               | coat                           | 97.58 $\pm$ 0.39 | 98.70 $\pm$ 0.18 | 96.19 $\pm$ 0.45 | 97.67 $\pm$ 0.52 | 95.82 $\pm$ 1.10  | 99.19 $\pm$ 0.09                   | 99.23 $\pm$ 0.15                   |
|               | sandal                         | 98.54 $\pm$ 0.45 | 97.32 $\pm$ 0.29 | 98.16 $\pm$ 0.58 | 97.56 $\pm$ 1.85 | 98.58 $\pm$ 0.52  | 99.19 $\pm$ 0.12                   | 99.54 $\pm$ 0.06                   |
|               | shirt                          | 96.09 $\pm$ 0.70 | 98.53 $\pm$ 0.12 | 96.05 $\pm$ 0.32 | 97.75 $\pm$ 0.19 | 96.42 $\pm$ 0.92  | 98.47 $\pm$ 0.15                   | 98.85 $\pm$ 0.10                   |
|               | sneaker                        | 99.62 $\pm$ 0.09 | 99.66 $\pm$ 0.08 | 99.42 $\pm$ 0.14 | 99.66 $\pm$ 0.05 | 86.98 $\pm$ 18.99 | 99.92 $\pm$ 0.02                   | 99.95 $\pm$ 0.02                   |
|               | bag                            | 94.86 $\pm$ 0.94 | 97.40 $\pm$ 0.22 | 94.72 $\pm$ 0.40 | 96.41 $\pm$ 0.71 | 94.56 $\pm$ 1.07  | 99.45 $\pm$ 0.07                   | 99.75 $\pm$ 0.03                   |
| CIFAR10       | ankle-boot                     | 98.98 $\pm$ 0.21 | 99.47 $\pm$ 0.07 | 98.19 $\pm$ 0.40 | 99.14 $\pm$ 0.20 | 96.83 $\pm$ 2.15  | 99.92 $\pm$ 0.01                   | 99.97 $\pm$ 0.01                   |
|               | <i>average</i>                 | 97.77 $\pm$ 0.09 | 98.81 $\pm$ 0.02 | 97.42 $\pm$ 0.11 | 98.28 $\pm$ 0.15 | 95.54 $\pm$ 1.95  | 99.40 $\pm$ 0.02                   | <b>99.56 <math>\pm</math> 0.02</b> |
|               | airplane                       | 97.45 $\pm$ 0.32 | 96.74 $\pm$ 0.12 | 97.82 $\pm$ 0.09 | 96.96 $\pm$ 0.40 | 95.30 $\pm$ 1.25  | 96.04 $\pm$ 0.40                   | 98.44 $\pm$ 0.16                   |
|               | automobile                     | 93.63 $\pm$ 0.43 | 90.57 $\pm$ 0.21 | 92.70 $\pm$ 0.29 | 91.03 $\pm$ 0.41 | 95.94 $\pm$ 1.23  | 97.98 $\pm$ 0.36                   | 99.70 $\pm$ 0.03                   |
|               | bird                           | 96.87 $\pm$ 0.25 | 97.16 $\pm$ 0.21 | 97.05 $\pm$ 0.23 | 97.36 $\pm$ 0.32 | 94.53 $\pm$ 0.45  | 96.09 $\pm$ 0.32                   | 98.25 $\pm$ 0.17                   |
|               | cat                            | 96.20 $\pm$ 0.18 | 95.04 $\pm$ 0.22 | 96.13 $\pm$ 0.23 | 95.79 $\pm$ 0.12 | 94.87 $\pm$ 0.59  | 95.89 $\pm$ 0.37                   | 98.12 $\pm$ 0.06                   |
|               | deer                           | 96.06 $\pm$ 0.47 | 97.25 $\pm$ 0.30 | 96.30 $\pm$ 0.34 | 97.32 $\pm$ 0.26 | 95.26 $\pm$ 0.76  | 96.94 $\pm$ 0.41                   | 98.80 $\pm$ 0.17                   |
|               | dog                            | 95.44 $\pm$ 0.34 | 94.81 $\pm$ 0.20 | 96.09 $\pm$ 0.15 | 95.30 $\pm$ 0.36 | 95.35 $\pm$ 0.42  | 96.66 $\pm$ 0.38                   | 99.19 $\pm$ 0.09                   |
|               | frog                           | 94.89 $\pm$ 0.42 | 96.16 $\pm$ 0.23 | 93.84 $\pm$ 0.30 | 95.69 $\pm$ 0.41 | 96.66 $\pm$ 0.32  | 97.09 $\pm$ 0.45                   | 99.00 $\pm$ 0.09                   |
|               | horse                          | 94.27 $\pm$ 0.20 | 93.69 $\pm$ 0.26 | 94.41 $\pm$ 0.25 | 94.08 $\pm$ 0.32 | 95.54 $\pm$ 0.76  | 98.21 $\pm$ 0.21                   | 99.60 $\pm$ 0.07                   |
| CIFAR100      | ship                           | 97.69 $\pm$ 0.27 | 97.22 $\pm$ 0.14 | 97.83 $\pm$ 0.09 | 97.49 $\pm$ 0.28 | 95.70 $\pm$ 0.45  | 97.81 $\pm$ 0.28                   | 99.46 $\pm$ 0.08                   |
|               | truck                          | 92.67 $\pm$ 0.21 | 90.86 $\pm$ 0.43 | 92.39 $\pm$ 0.61 | 91.39 $\pm$ 0.61 | 96.29 $\pm$ 0.54  | 97.93 $\pm$ 0.24                   | 99.16 $\pm$ 0.15                   |
|               | <i>average</i>                 | 95.52 $\pm$ 0.14 | 94.95 $\pm$ 0.07 | 95.46 $\pm$ 0.09 | 95.24 $\pm$ 0.09 | 95.54 $\pm$ 0.22  | 97.06 $\pm$ 0.06                   | <b>98.97 <math>\pm</math> 0.04</b> |
|               | aquatic mammals                | 96.50 $\pm$ 0.31 | 96.65 $\pm$ 0.27 | 96.96 $\pm$ 0.24 | 96.96 $\pm$ 0.24 | 95.03 $\pm$ 0.79  | 95.70 $\pm$ 0.42                   | 98.28 $\pm$ 0.13                   |
|               | fish                           | 96.96 $\pm$ 0.26 | 96.45 $\pm$ 0.20 | 96.69 $\pm$ 0.18 | 96.65 $\pm$ 0.31 | 94.14 $\pm$ 0.65  | 95.92 $\pm$ 0.26                   | 97.69 $\pm$ 0.31                   |
|               | flowers                        | 93.46 $\pm$ 0.45 | 92.20 $\pm$ 0.27 | 92.31 $\pm$ 0.68 | 92.22 $\pm$ 1.12 | 96.90 $\pm$ 1.25  | 95.67 $\pm$ 0.21                   | 98.43 $\pm$ 0.24                   |
|               | food containers                | 96.69 $\pm$ 0.54 | 96.52 $\pm$ 0.39 | 96.92 $\pm$ 0.11 | 96.66 $\pm$ 0.25 | 94.60 $\pm$ 0.53  | 95.59 $\pm$ 0.40                   | 98.92 $\pm$ 0.08                   |
|               | fruit and vegetables           | 95.91 $\pm$ 0.72 | 94.14 $\pm$ 0.30 | 95.73 $\pm$ 0.31 | 94.37 $\pm$ 0.59 | 97.14 $\pm$ 0.24  | 95.43 $\pm$ 0.57                   | 98.47 $\pm$ 0.08                   |
|               | household electrical devices   | 95.54 $\pm$ 0.20 | 94.08 $\pm$ 0.50 | 95.96 $\pm$ 0.30 | 94.78 $\pm$ 0.38 | 94.94 $\pm$ 0.31  | 94.89 $\pm$ 0.63                   | 97.02 $\pm$ 0.24                   |
|               | household furniture            | 96.41 $\pm$ 0.54 | 95.43 $\pm$ 0.35 | 97.07 $\pm$ 0.31 | 95.69 $\pm$ 0.49 | 94.99 $\pm$ 1.06  | 95.12 $\pm$ 0.40                   | 98.87 $\pm$ 0.07                   |
| CIFAR100      | inserts                        | 94.87 $\pm$ 0.38 | 94.77 $\pm$ 0.35 | 94.42 $\pm$ 0.34 | 94.73 $\pm$ 0.28 | 95.27 $\pm$ 0.20  | 95.38 $\pm$ 0.58                   | 98.22 $\pm$ 0.12                   |
|               | large carnivores               | 94.46 $\pm$ 0.37 | 95.14 $\pm$ 0.53 | 94.78 $\pm$ 0.31 | 95.37 $\pm$ 0.63 | 96.08 $\pm$ 0.46  | 96.47 $\pm$ 0.31                   | 99.18 $\pm$ 0.15                   |
|               | large man-made outdoor things  | 96.64 $\pm$ 0.40 | 96.47 $\pm$ 0.58 | 97.25 $\pm$ 0.57 | 96.72 $\pm$ 0.68 | 95.95 $\pm$ 1.06  | 97.27 $\pm$ 0.16                   | 99.17 $\pm$ 0.24                   |
|               | large natural outdoor scenes   | 98.86 $\pm$ 0.11 | 98.74 $\pm$ 0.23 | 98.68 $\pm$ 0.09 | 98.70 $\pm$ 0.15 | 95.23 $\pm$ 1.16  | 96.71 $\pm$ 0.30                   | 99.10 $\pm$ 0.06                   |
|               | large omnivores and herbivores | 94.42 $\pm$ 0.40 | 94.81 $\pm$ 0.57 | 95.17 $\pm$ 0.34 | 95.39 $\pm$ 0.59 | 95.80 $\pm$ 0.23  | 95.88 $\pm$ 0.14                   | 98.91 $\pm$ 0.03                   |
|               | medium-sized mammals           | 95.93 $\pm$ 0.31 | 95.76 $\pm$ 0.28 | 96.20 $\pm$ 0.43 | 96.36 $\pm$ 0.46 | 96.23 $\pm$ 0.41  | 96.03 $\pm$ 0.16                   | 98.92 $\pm$ 0.11                   |
|               | non-insert invertebrates       | 95.76 $\pm$ 0.21 | 96.36 $\pm$ 0.23 | 95.51 $\pm$ 0.15 | 96.11 $\pm$ 0.18 | 94.95 $\pm$ 0.41  | 95.02 $\pm$ 0.20                   | 96.96 $\pm$ 0.21                   |
|               | people                         | 94.11 $\pm$ 0.31 | 92.71 $\pm$ 0.56 | 94.25 $\pm$ 0.30 | 93.15 $\pm$ 0.51 | 95.96 $\pm$ 0.38  | 95.79 $\pm$ 0.56                   | 99.45 $\pm$ 0.06                   |
|               | reptiles                       | 95.28 $\pm$ 0.22 | 95.88 $\pm$ 0.28 | 95.27 $\pm$ 0.14 | 95.92 $\pm$ 0.31 | 94.72 $\pm$ 0.57  | 95.35 $\pm$ 0.42                   | 97.41 $\pm$ 0.52                   |
|               | small mammals                  | 95.74 $\pm$ 0.50 | 96.40 $\pm$ 0.20 | 96.13 $\pm$ 0.30 | 96.60 $\pm$ 0.23 | 95.39 $\pm$ 0.68  | 96.17 $\pm$ 0.14                   | 98.14 $\pm$ 0.08                   |
| SVHN          | trees                          | 96.16 $\pm$ 0.81 | 96.17 $\pm$ 0.47 | 95.46 $\pm$ 0.57 | 96.09 $\pm$ 0.45 | 95.74 $\pm$ 0.66  | 98.11 $\pm$ 0.25                   | 99.52 $\pm$ 0.04                   |
|               | vehicles 1                     | 92.11 $\pm$ 0.53 | 92.10 $\pm$ 0.39 | 92.13 $\pm$ 0.77 | 92.35 $\pm$ 0.61 | 96.00 $\pm$ 0.48  | 96.54 $\pm$ 0.37                   | 99.28 $\pm$ 0.05                   |
|               | vehicles 2                     | 94.62 $\pm$ 0.23 | 94.36 $\pm$ 0.18 | 95.38 $\pm$ 0.27 | 94.52 $\pm$ 0.19 | 95.04 $\pm$ 0.90  | 96.12 $\pm$ 0.62                   | 98.89 $\pm$ 0.15                   |
|               | <i>average</i>                 | 95.52 $\pm$ 0.11 | 95.26 $\pm$ 0.08 | 95.61 $\pm$ 0.13 | 95.47 $\pm$ 0.13 | 95.51 $\pm$ 0.09  | 95.96 $\pm$ 0.09                   | <b>98.54 <math>\pm</math> 0.03</b> |
|               | 0                              | 95.40 $\pm$ 0.32 | 96.49 $\pm$ 0.21 | 95.51 $\pm$ 0.23 | 95.25 $\pm$ 0.12 | 94.87 $\pm$ 0.27  | 98.39 $\pm$ 0.11                   | 98.44 $\pm$ 0.19                   |
|               | 1                              | 95.64 $\pm$ 0.16 | 96.49 $\pm$ 0.09 | 95.80 $\pm$ 0.32 | 96.14 $\pm$ 0.21 | 94.71 $\pm$ 0.38  | 97.42 $\pm$ 0.35                   | 98.49 $\pm$ 0.09                   |
|               | 2                              | 95.13 $\pm$ 0.29 | 95.56 $\pm$ 0.16 | 94.94 $\pm$ 0.12 | 95.32 $\pm$ 0.16 | 94.92 $\pm$ 0.32  | 98.46 $\pm$ 0.25                   | 99.62 $\pm$ 0.03                   |
|               | 3                              | 94.95 $\pm$ 0.17 | 95.32 $\pm$ 0.11 | 94.94 $\pm$ 0.23 | 95.01 $\pm$ 0.21 | 95.04 $\pm$ 0.17  | 97.84 $\pm$ 0.23                   | 99.38 $\pm$ 0.05                   |
|               | 4                              | 95.31 $\pm$ 0.17 | 96.02 $\pm$ 0.16 | 95.47 $\pm$ 0.10 | 95.50 $\pm$ 0.15 | 94.97 $\pm$ 0.31  | 98.29 $\pm$ 0.23                   | 99.68 $\pm$ 0.01                   |
|               | 5                              | 94.90 $\pm$ 0.17 | 95.48 $\pm$ 0.13 | 94.75 $\pm$ 0.30 | 95.06 $\pm$ 0.17 | 95.22 $\pm$ 0.17  | 98.23 $\pm$ 0.24                   | 99.61 $\pm$ 0.03                   |
| SVHN          | 6                              | 95.03 $\pm$ 0.20 | 95.44 $\pm$ 0.21 | 94.73 $\pm$ 0.10 | 95.03 $\pm$ 0.08 | 94.87 $\pm$ 0.21  | 98.59 $\pm$ 0.14                   | 99.50 $\pm$ 0.03                   |
|               | 7                              | 95.61 $\pm$ 0.24 | 96.03 $\pm$ 0.16 | 95.36 $\pm$ 0.22 | 95.57 $\pm$ 0.35 | 94.90 $\pm$ 0.25  | 99.03 $\pm$ 0.07                   | 99.73 $\pm$ 0.01                   |
|               | 8                              | 94.90 $\pm$ 0.25 | 95.67 $\pm$ 0.21 | 95.00 $\pm$ 0.26 | 95.17 $\pm$ 0.21 | 94.94 $\pm$ 0.29  | 97.39 $\pm$ 0.35                   | 98.68 $\pm$ 0.13                   |
|               | 9                              | 95.00 $\pm$ 0.10 | 95.41 $\pm$ 0.26 | 94.83 $\pm$ 0.14 | 95.23 $\pm$ 0.18 | 95.03 $\pm$ 0.13  | 98.66 $\pm$ 0.11                   | 99.55 $\pm$ 0.05                   |
|               | <i>average</i>                 | 95.19 $\pm$ 0.06 | 95.79 $\pm$ 0.08 | 95.13 $\pm$ 0.04 | 95.33 $\pm$ 0.05 | 94.95 $\pm$ 0.09  | 98.23 $\pm$ 0.03                   | <b>99.27 <math>\pm</math> 0.03</b> |

Table 7: AUPR-in (%) (inliers as positive class) when  $\rho = 0.1$ 

| Dataset       | Class name                     | CAE              | CAE-IF           | DRAE             | RDAE             | DAGMM            | SSD-IF           | $E^3$ Outlier                      |
|---------------|--------------------------------|------------------|------------------|------------------|------------------|------------------|------------------|------------------------------------|
| MNIST         | 0                              | 88.93 $\pm$ 1.38 | 98.76 $\pm$ 0.31 | 90.84 $\pm$ 4.12 | 90.61 $\pm$ 1.84 | 94.66 $\pm$ 6.03 | 98.84 $\pm$ 0.14 | 99.33 $\pm$ 0.03                   |
|               | 1                              | 99.90 $\pm$ 0.02 | 99.92 $\pm$ 0.01 | 97.46 $\pm$ 1.17 | 99.91 $\pm$ 0.01 | 98.26 $\pm$ 2.79 | 99.60 $\pm$ 0.05 | 99.43 $\pm$ 0.05                   |
|               | 2                              | 88.81 $\pm$ 1.63 | 95.66 $\pm$ 0.40 | 89.84 $\pm$ 1.85 | 90.49 $\pm$ 0.55 | 89.24 $\pm$ 3.08 | 98.92 $\pm$ 0.16 | 99.20 $\pm$ 0.05                   |
|               | 3                              | 90.84 $\pm$ 1.87 | 97.43 $\pm$ 0.47 | 93.14 $\pm$ 1.49 | 91.90 $\pm$ 0.46 | 89.78 $\pm$ 0.80 | 99.47 $\pm$ 0.12 | 99.68 $\pm$ 0.04                   |
|               | 4                              | 92.36 $\pm$ 1.39 | 97.28 $\pm$ 0.54 | 92.94 $\pm$ 1.53 | 93.73 $\pm$ 0.73 | 92.69 $\pm$ 2.24 | 99.46 $\pm$ 0.12 | 99.48 $\pm$ 0.04                   |
|               | 5                              | 90.06 $\pm$ 0.28 | 96.87 $\pm$ 0.27 | 92.49 $\pm$ 1.59 | 91.54 $\pm$ 0.72 | 90.73 $\pm$ 1.54 | 99.02 $\pm$ 0.22 | 98.98 $\pm$ 0.08                   |
|               | 6                              | 93.29 $\pm$ 1.09 | 98.88 $\pm$ 0.13 | 94.81 $\pm$ 1.94 | 93.99 $\pm$ 0.70 | 93.53 $\pm$ 2.48 | 99.72 $\pm$ 0.01 | 99.64 $\pm$ 0.01                   |
|               | 7                              | 95.82 $\pm$ 1.31 | 98.95 $\pm$ 0.14 | 95.71 $\pm$ 0.75 | 97.05 $\pm$ 0.52 | 95.43 $\pm$ 2.17 | 99.14 $\pm$ 0.19 | 99.12 $\pm$ 0.03                   |
|               | 8                              | 86.54 $\pm$ 0.35 | 95.59 $\pm$ 0.76 | 88.06 $\pm$ 1.78 | 87.54 $\pm$ 0.59 | 91.47 $\pm$ 2.25 | 98.29 $\pm$ 0.24 | 98.39 $\pm$ 0.18                   |
|               | 9                              | 93.22 $\pm$ 0.71 | 98.67 $\pm$ 0.20 | 94.23 $\pm$ 4.20 | 93.94 $\pm$ 0.91 | 93.10 $\pm$ 0.88 | 99.46 $\pm$ 0.09 | 99.42 $\pm$ 0.05                   |
|               | <i>average</i>                 | 91.98 $\pm$ 0.27 | 97.80 $\pm$ 0.12 | 92.95 $\pm$ 0.87 | 93.07 $\pm$ 0.32 | 92.89 $\pm$ 0.77 | 99.19 $\pm$ 0.05 | <b>99.27 <math>\pm</math> 0.02</b> |
| Fashion-MNIST | t-shirt                        | 91.59 $\pm$ 1.73 | 98.10 $\pm$ 0.14 | 93.29 $\pm$ 1.49 | 95.38 $\pm$ 0.92 | 91.58 $\pm$ 3.80 | 98.33 $\pm$ 0.13 | 99.08 $\pm$ 0.06                   |
|               | trouser                        | 99.54 $\pm$ 0.03 | 99.58 $\pm$ 0.07 | 95.95 $\pm$ 3.30 | 99.66 $\pm$ 0.05 | 95.64 $\pm$ 2.46 | 99.76 $\pm$ 0.05 | 99.80 $\pm$ 0.02                   |
|               | pullover                       | 92.07 $\pm$ 0.62 | 97.41 $\pm$ 0.31 | 92.35 $\pm$ 1.00 | 94.38 $\pm$ 1.33 | 90.77 $\pm$ 4.41 | 97.99 $\pm$ 0.25 | 98.46 $\pm$ 0.25                   |
|               | dress                          | 96.62 $\pm$ 0.33 | 97.82 $\pm$ 0.14 | 96.22 $\pm$ 0.71 | 96.86 $\pm$ 0.57 | 93.07 $\pm$ 8.49 | 98.63 $\pm$ 0.14 | 98.65 $\pm$ 0.13                   |
|               | coat                           | 93.59 $\pm$ 0.77 | 96.97 $\pm$ 0.24 | 91.18 $\pm$ 1.17 | 94.78 $\pm$ 0.36 | 89.56 $\pm$ 3.81 | 98.29 $\pm$ 0.07 | 98.34 $\pm$ 0.21                   |
|               | sandal                         | 95.71 $\pm$ 1.05 | 93.97 $\pm$ 0.68 | 95.69 $\pm$ 0.85 | 95.90 $\pm$ 0.30 | 97.32 $\pm$ 0.82 | 97.95 $\pm$ 0.20 | 99.11 $\pm$ 0.04                   |
|               | shirt                          | 90.25 $\pm$ 1.35 | 96.69 $\pm$ 0.20 | 91.78 $\pm$ 0.81 | 94.79 $\pm$ 0.68 | 91.63 $\pm$ 1.79 | 96.79 $\pm$ 0.18 | 97.45 $\pm$ 0.23                   |
|               | sneaker                        | 98.65 $\pm$ 0.27 | 98.85 $\pm$ 0.12 | 98.72 $\pm$ 0.21 | 98.79 $\pm$ 0.18 | 94.14 $\pm$ 8.05 | 99.77 $\pm$ 0.05 | 99.88 $\pm$ 0.02                   |
|               | bag                            | 88.46 $\pm$ 1.04 | 94.00 $\pm$ 0.27 | 89.02 $\pm$ 0.66 | 90.56 $\pm$ 1.07 | 91.05 $\pm$ 2.11 | 97.25 $\pm$ 0.36 | 99.19 $\pm$ 0.05                   |
|               | ankle-boot                     | 96.91 $\pm$ 0.55 | 98.08 $\pm$ 0.26 | 94.28 $\pm$ 1.54 | 96.80 $\pm$ 1.43 | 92.28 $\pm$ 7.00 | 99.81 $\pm$ 0.04 | 99.93 $\pm$ 0.01                   |
|               | <i>average</i>                 | 94.34 $\pm$ 0.25 | 97.15 $\pm$ 0.06 | 93.85 $\pm$ 0.44 | 95.79 $\pm$ 0.34 | 92.70 $\pm$ 2.92 | 98.46 $\pm$ 0.04 | <b>98.99 <math>\pm</math> 0.04</b> |
| CIFAR10       | airplane                       | 94.61 $\pm$ 1.02 | 93.06 $\pm$ 0.33 | 95.35 $\pm$ 0.26 | 93.48 $\pm$ 0.47 | 90.03 $\pm$ 1.78 | 90.70 $\pm$ 0.77 | 96.56 $\pm$ 0.20                   |
|               | automobile                     | 86.35 $\pm$ 0.99 | 82.78 $\pm$ 0.49 | 85.35 $\pm$ 0.28 | 83.33 $\pm$ 0.61 | 92.68 $\pm$ 0.58 | 95.20 $\pm$ 0.35 | 99.12 $\pm$ 0.12                   |
|               | bird                           | 92.71 $\pm$ 1.47 | 94.24 $\pm$ 0.41 | 93.98 $\pm$ 0.34 | 94.44 $\pm$ 0.34 | 89.48 $\pm$ 1.61 | 91.17 $\pm$ 0.72 | 95.62 $\pm$ 0.33                   |
|               | cat                            | 92.23 $\pm$ 0.61 | 89.71 $\pm$ 0.31 | 92.08 $\pm$ 0.56 | 90.85 $\pm$ 0.82 | 89.96 $\pm$ 0.26 | 91.50 $\pm$ 0.52 | 95.50 $\pm$ 0.28                   |
|               | deer                           | 93.18 $\pm$ 0.95 | 94.76 $\pm$ 0.43 | 92.43 $\pm$ 0.46 | 94.99 $\pm$ 0.46 | 91.34 $\pm$ 1.03 | 93.85 $\pm$ 0.30 | 97.16 $\pm$ 0.11                   |
|               | dog                            | 91.31 $\pm$ 0.80 | 89.39 $\pm$ 0.33 | 92.10 $\pm$ 0.23 | 90.91 $\pm$ 0.34 | 91.11 $\pm$ 0.96 | 93.24 $\pm$ 0.66 | 97.86 $\pm$ 0.16                   |
|               | frog                           | 91.14 $\pm$ 1.07 | 92.43 $\pm$ 0.44 | 86.72 $\pm$ 0.41 | 91.21 $\pm$ 0.62 | 92.90 $\pm$ 1.29 | 93.75 $\pm$ 0.73 | 97.42 $\pm$ 0.26                   |
|               | horse                          | 88.14 $\pm$ 0.18 | 87.56 $\pm$ 0.44 | 88.66 $\pm$ 0.36 | 88.72 $\pm$ 0.59 | 91.63 $\pm$ 0.89 | 95.67 $\pm$ 0.24 | 98.94 $\pm$ 0.07                   |
|               | ship                           | 95.26 $\pm$ 0.55 | 94.21 $\pm$ 0.21 | 95.53 $\pm$ 0.38 | 94.37 $\pm$ 0.46 | 90.67 $\pm$ 2.99 | 94.67 $\pm$ 0.52 | 98.87 $\pm$ 0.03                   |
|               | truck                          | 85.32 $\pm$ 1.00 | 83.31 $\pm$ 0.50 | 85.15 $\pm$ 0.57 | 84.20 $\pm$ 0.50 | 93.03 $\pm$ 1.93 | 95.22 $\pm$ 0.22 | 98.29 $\pm$ 0.19                   |
|               | <i>average</i>                 | 91.03 $\pm$ 0.35 | 90.15 $\pm$ 0.05 | 90.73 $\pm$ 0.06 | 90.65 $\pm$ 0.17 | 91.28 $\pm$ 0.57 | 93.50 $\pm$ 0.10 | <b>97.53 <math>\pm</math> 0.06</b> |
| CIFAR100      | aquatic mammals                | 92.97 $\pm$ 1.02 | 92.72 $\pm$ 0.19 | 93.38 $\pm$ 0.45 | 93.11 $\pm$ 0.17 | 89.71 $\pm$ 0.89 | 91.21 $\pm$ 0.51 | 96.08 $\pm$ 0.54                   |
|               | fish                           | 93.53 $\pm$ 0.87 | 92.30 $\pm$ 0.27 | 93.65 $\pm$ 0.43 | 93.00 $\pm$ 0.74 | 88.16 $\pm$ 0.57 | 91.43 $\pm$ 0.41 | 95.24 $\pm$ 0.31                   |
|               | flowers                        | 86.32 $\pm$ 3.56 | 85.38 $\pm$ 0.28 | 84.67 $\pm$ 0.45 | 84.70 $\pm$ 1.65 | 93.43 $\pm$ 1.65 | 91.71 $\pm$ 0.38 | 96.47 $\pm$ 0.22                   |
|               | food containers                | 93.29 $\pm$ 1.21 | 92.30 $\pm$ 0.58 | 93.98 $\pm$ 0.23 | 92.81 $\pm$ 0.56 | 90.23 $\pm$ 0.56 | 90.16 $\pm$ 0.81 | 97.20 $\pm$ 0.26                   |
|               | fruit and vegetables           | 90.71 $\pm$ 1.36 | 87.19 $\pm$ 0.67 | 91.44 $\pm$ 0.80 | 86.94 $\pm$ 1.71 | 93.07 $\pm$ 1.75 | 90.92 $\pm$ 0.76 | 96.60 $\pm$ 0.22                   |
|               | household electrical devices   | 91.31 $\pm$ 0.95 | 88.25 $\pm$ 0.13 | 90.72 $\pm$ 1.49 | 88.76 $\pm$ 0.62 | 89.38 $\pm$ 0.48 | 89.75 $\pm$ 0.20 | 93.65 $\pm$ 0.66                   |
|               | household furniture            | 92.62 $\pm$ 1.13 | 90.25 $\pm$ 0.48 | 93.02 $\pm$ 0.59 | 90.82 $\pm$ 0.81 | 90.65 $\pm$ 0.91 | 89.12 $\pm$ 0.53 | 97.28 $\pm$ 0.14                   |
|               | inserts                        | 90.07 $\pm$ 1.26 | 90.35 $\pm$ 0.65 | 88.93 $\pm$ 0.49 | 89.86 $\pm$ 0.97 | 90.29 $\pm$ 0.56 | 90.62 $\pm$ 0.18 | 95.65 $\pm$ 0.23                   |
|               | large carnivores               | 90.37 $\pm$ 1.20 | 91.05 $\pm$ 0.69 | 88.66 $\pm$ 1.04 | 91.36 $\pm$ 0.74 | 92.30 $\pm$ 0.18 | 92.48 $\pm$ 0.75 | 98.08 $\pm$ 0.22                   |
|               | large man-made outdoor things  | 93.27 $\pm$ 0.96 | 92.83 $\pm$ 0.35 | 93.68 $\pm$ 0.76 | 93.73 $\pm$ 0.45 | 93.59 $\pm$ 1.71 | 93.31 $\pm$ 0.41 | 98.26 $\pm$ 0.23                   |
|               | large natural outdoor scenes   | 95.97 $\pm$ 1.89 | 97.26 $\pm$ 0.47 | 97.53 $\pm$ 0.20 | 96.92 $\pm$ 0.71 | 91.35 $\pm$ 1.39 | 93.13 $\pm$ 0.73 | 97.97 $\pm$ 0.21                   |
|               | large omnivores and herbivores | 89.62 $\pm$ 0.63 | 90.38 $\pm$ 0.35 | 90.05 $\pm$ 0.23 | 91.80 $\pm$ 0.69 | 91.98 $\pm$ 0.59 | 91.61 $\pm$ 1.06 | 97.62 $\pm$ 0.17                   |
|               | medium-sized mammals           | 92.04 $\pm$ 1.03 | 91.81 $\pm$ 0.20 | 90.92 $\pm$ 0.65 | 92.34 $\pm$ 0.67 | 92.29 $\pm$ 0.72 | 92.05 $\pm$ 0.56 | 97.55 $\pm$ 0.12                   |
|               | non-insert invertebrates       | 91.21 $\pm$ 0.52 | 93.00 $\pm$ 0.29 | 91.44 $\pm$ 0.11 | 91.86 $\pm$ 0.32 | 89.19 $\pm$ 0.56 | 90.00 $\pm$ 0.40 | 93.56 $\pm$ 0.44                   |
|               | people                         | 88.44 $\pm$ 0.94 | 85.70 $\pm$ 0.29 | 88.11 $\pm$ 0.64 | 87.44 $\pm$ 0.50 | 91.29 $\pm$ 0.64 | 91.15 $\pm$ 0.50 | 98.69 $\pm$ 0.07                   |
|               | reptiles                       | 90.88 $\pm$ 0.50 | 91.98 $\pm$ 0.32 | 90.79 $\pm$ 0.45 | 91.69 $\pm$ 0.15 | 90.04 $\pm$ 0.42 | 90.50 $\pm$ 0.66 | 94.87 $\pm$ 0.46                   |
|               | small mammals                  | 91.84 $\pm$ 1.30 | 93.06 $\pm$ 0.36 | 92.21 $\pm$ 0.46 | 93.33 $\pm$ 0.58 | 91.15 $\pm$ 1.17 | 91.56 $\pm$ 0.20 | 96.20 $\pm$ 0.34                   |
|               | trees                          | 90.85 $\pm$ 1.79 | 92.49 $\pm$ 0.40 | 90.51 $\pm$ 0.60 | 92.16 $\pm$ 0.61 | 92.17 $\pm$ 1.63 | 95.10 $\pm$ 0.80 | 98.95 $\pm$ 0.10                   |
|               | vehicles 1                     | 85.29 $\pm$ 0.39 | 86.51 $\pm$ 0.36 | 84.10 $\pm$ 0.57 | 85.92 $\pm$ 0.47 | 91.61 $\pm$ 0.44 | 92.32 $\pm$ 0.80 | 98.53 $\pm$ 0.11                   |
|               | vehicles 2                     | 89.13 $\pm$ 1.39 | 88.97 $\pm$ 0.54 | 89.85 $\pm$ 0.58 | 89.22 $\pm$ 0.63 | 90.53 $\pm$ 0.69 | 91.22 $\pm$ 0.41 | 97.79 $\pm$ 0.23                   |
|               | <i>average</i>                 | 90.99 $\pm$ 0.39 | 90.69 $\pm$ 0.08 | 90.88 $\pm$ 0.21 | 90.89 $\pm$ 0.26 | 91.12 $\pm$ 0.23 | 91.47 $\pm$ 0.06 | <b>96.81 <math>\pm</math> 0.06</b> |
| SVHN          | 0                              | 90.02 $\pm$ 0.66 | 92.42 $\pm$ 0.46 | 90.48 $\pm$ 0.27 | 90.69 $\pm$ 0.34 | 90.08 $\pm$ 0.16 | 96.76 $\pm$ 0.32 | 95.20 $\pm$ 0.24                   |
|               | 1                              | 91.65 $\pm$ 0.55 | 92.93 $\pm$ 0.38 | 91.77 $\pm$ 0.74 | 92.18 $\pm$ 0.52 | 89.95 $\pm$ 0.50 | 94.23 $\pm$ 0.43 | 95.99 $\pm$ 0.28                   |
|               | 2                              | 90.12 $\pm$ 0.30 | 91.27 $\pm$ 0.49 | 90.43 $\pm$ 0.48 | 90.43 $\pm$ 0.33 | 89.75 $\pm$ 0.25 | 96.01 $\pm$ 0.32 | 99.05 $\pm$ 0.07                   |
|               | 3                              | 90.18 $\pm$ 0.14 | 90.60 $\pm$ 0.21 | 90.09 $\pm$ 0.29 | 90.30 $\pm$ 0.28 | 90.20 $\pm$ 0.19 | 94.94 $\pm$ 0.58 | 98.48 $\pm$ 0.05                   |
|               | 4                              | 90.49 $\pm$ 0.39 | 91.71 $\pm$ 0.36 | 90.92 $\pm$ 0.22 | 91.46 $\pm$ 0.30 | 89.83 $\pm$ 0.50 | 95.30 $\pm$ 0.65 | 99.16 $\pm$ 0.05                   |
|               | 5                              | 89.59 $\pm$ 0.29 | 90.75 $\pm$ 0.32 | 89.66 $\pm$ 0.18 | 90.02 $\pm$ 0.19 | 89.96 $\pm$ 0.30 | 96.27 $\pm$ 0.56 | 99.07 $\pm$ 0.04                   |
|               | 6                              | 90.08 $\pm$ 0.32 | 90.52 $\pm$ 0.34 | 89.60 $\pm$ 0.40 | 90.19 $\pm$ 0.18 | 90.19 $\pm$ 0.56 | 96.26 $\pm$ 0.45 | 98.73 $\pm$ 0.04                   |
|               | 7                              | 90.58 $\pm$ 0.05 | 91.82 $\pm$ 0.35 | 90.82 $\pm$ 0.40 | 90.67 $\pm$ 0.36 | 89.94 $\pm$ 0.63 | 96.96 $\pm$ 0.53 | 99.23 $\pm$ 0.04                   |
|               | 8                              | 89.78 $\pm$ 0.30 | 91.04 $\pm$ 0.32 | 89.60 $\pm$ 0.43 | 90.03 $\pm$ 0.48 | 89.84 $\pm$ 0.28 | 95.18 $\pm$ 0.38 | 96.33 $\pm$ 0.49                   |
|               | 9                              | 90.17 $\pm$ 0.19 | 91.02 $\pm$ 0.21 | 90.02 $\pm$ 0.18 | 90.43 $\pm$ 0.24 | 90.22 $\pm$ 0.53 | 96.66 $\pm$ 0.21 | 98.79 $\pm$ 0.05                   |
|               | <i>average</i>                 | 90.27 $\pm$ 0.08 | 91.41 $\pm$ 0.19 | 90.34 $\pm$ 0.15 | 90.64 $\pm$ 0.14 | 90.00 $\pm$ 0.14 | 95.86 $\pm$ 0.12 | <b>98.00 <math>\pm</math> 0.05</b> |

Table 8: AUPR-in (%) (inliers as positive class) when  $\rho = 0.15$ 

| Dataset       | Class name                     | CAE              | CAE-IF           | DRAE             | RDAE             | DAGMM             | SSD-IF           | $E^3$ Outlier                      |
|---------------|--------------------------------|------------------|------------------|------------------|------------------|-------------------|------------------|------------------------------------|
| MNIST         | 0                              | 80.78 $\pm$ 1.94 | 97.60 $\pm$ 0.46 | 86.77 $\pm$ 7.19 | 83.40 $\pm$ 2.27 | 92.69 $\pm$ 7.89  | 97.88 $\pm$ 0.63 | 98.36 $\pm$ 0.06                   |
|               | 1                              | 99.78 $\pm$ 0.06 | 99.87 $\pm$ 0.02 | 97.44 $\pm$ 2.24 | 99.81 $\pm$ 0.03 | 93.55 $\pm$ 10.88 | 99.30 $\pm$ 0.12 | 98.44 $\pm$ 0.19                   |
|               | 2                              | 82.33 $\pm$ 1.19 | 91.92 $\pm$ 0.74 | 85.58 $\pm$ 3.06 | 83.33 $\pm$ 1.32 | 84.61 $\pm$ 1.79  | 97.86 $\pm$ 0.15 | 98.62 $\pm$ 0.05                   |
|               | 3                              | 84.14 $\pm$ 1.00 | 95.18 $\pm$ 0.74 | 90.32 $\pm$ 3.20 | 87.02 $\pm$ 0.93 | 86.94 $\pm$ 2.74  | 98.83 $\pm$ 0.10 | 99.44 $\pm$ 0.02                   |
|               | 4                              | 87.48 $\pm$ 0.49 | 94.79 $\pm$ 0.34 | 91.07 $\pm$ 3.35 | 89.27 $\pm$ 0.19 | 89.82 $\pm$ 3.76  | 98.83 $\pm$ 0.17 | 98.97 $\pm$ 0.05                   |
|               | 5                              | 84.04 $\pm$ 1.73 | 96.90 $\pm$ 0.35 | 84.95 $\pm$ 0.98 | 83.23 $\pm$ 2.22 | 86.32 $\pm$ 2.20  | 97.67 $\pm$ 0.24 | 98.15 $\pm$ 0.13                   |
|               | 6                              | 87.22 $\pm$ 1.15 | 97.70 $\pm$ 0.48 | 87.58 $\pm$ 5.50 | 89.16 $\pm$ 0.64 | 87.78 $\pm$ 4.73  | 99.33 $\pm$ 0.04 | 99.38 $\pm$ 0.03                   |
|               | 7                              | 91.05 $\pm$ 1.98 | 98.32 $\pm$ 0.14 | 92.80 $\pm$ 0.74 | 93.85 $\pm$ 1.04 | 88.21 $\pm$ 5.35  | 98.41 $\pm$ 0.28 | 98.45 $\pm$ 0.03                   |
|               | 8                              | 80.19 $\pm$ 1.50 | 92.35 $\pm$ 0.67 | 87.25 $\pm$ 4.61 | 81.16 $\pm$ 1.88 | 85.54 $\pm$ 1.30  | 96.51 $\pm$ 0.33 | 97.27 $\pm$ 0.23                   |
|               | 9                              | 89.49 $\pm$ 1.09 | 97.73 $\pm$ 0.22 | 91.10 $\pm$ 1.80 | 90.86 $\pm$ 0.91 | 89.18 $\pm$ 3.23  | 98.99 $\pm$ 0.13 | 99.01 $\pm$ 0.08                   |
|               | <i>average</i>                 | 86.65 $\pm$ 0.25 | 96.23 $\pm$ 0.12 | 89.49 $\pm$ 1.20 | 88.11 $\pm$ 0.56 | 88.47 $\pm$ 0.84  | 98.36 $\pm$ 0.11 | <b>98.61 <math>\pm</math> 0.03</b> |
| Fashion-MNIST | t-shirt                        | 88.16 $\pm$ 1.92 | 96.82 $\pm$ 0.19 | 90.84 $\pm$ 0.99 | 92.77 $\pm$ 1.37 | 76.51 $\pm$ 14.59 | 97.04 $\pm$ 0.04 | 98.50 $\pm$ 0.07                   |
|               | trouser                        | 99.16 $\pm$ 0.11 | 99.21 $\pm$ 0.17 | 98.61 $\pm$ 0.34 | 99.34 $\pm$ 0.12 | 78.62 $\pm$ 18.27 | 99.55 $\pm$ 0.11 | 99.57 $\pm$ 0.02                   |
|               | pullover                       | 87.15 $\pm$ 2.83 | 95.66 $\pm$ 0.22 | 88.13 $\pm$ 2.21 | 90.43 $\pm$ 2.02 | 86.20 $\pm$ 4.64  | 96.88 $\pm$ 0.16 | 97.54 $\pm$ 0.29                   |
|               | dress                          | 94.01 $\pm$ 0.49 | 95.80 $\pm$ 0.36 | 93.83 $\pm$ 0.51 | 93.92 $\pm$ 1.41 | 86.91 $\pm$ 3.51  | 97.53 $\pm$ 0.27 | 97.35 $\pm$ 0.24                   |
|               | coat                           | 88.70 $\pm$ 0.89 | 94.94 $\pm$ 0.28 | 87.31 $\pm$ 1.28 | 89.25 $\pm$ 2.80 | 82.60 $\pm$ 10.02 | 97.16 $\pm$ 0.21 | 97.15 $\pm$ 0.12                   |
|               | sandal                         | 92.01 $\pm$ 0.61 | 89.45 $\pm$ 0.48 | 93.37 $\pm$ 0.41 | 93.19 $\pm$ 1.04 | 94.87 $\pm$ 3.58  | 96.26 $\pm$ 0.53 | 98.38 $\pm$ 0.16                   |
|               | shirt                          | 85.54 $\pm$ 1.48 | 94.50 $\pm$ 0.22 | 86.92 $\pm$ 0.78 | 90.65 $\pm$ 1.67 | 85.18 $\pm$ 2.77  | 94.80 $\pm$ 0.30 | 95.83 $\pm$ 0.14                   |
|               | sneaker                        | 97.04 $\pm$ 0.95 | 98.08 $\pm$ 0.24 | 96.99 $\pm$ 0.67 | 97.82 $\pm$ 0.46 | 72.83 $\pm$ 19.02 | 99.61 $\pm$ 0.08 | 99.79 $\pm$ 0.05                   |
|               | bag                            | 82.00 $\pm$ 3.48 | 88.51 $\pm$ 0.88 | 83.19 $\pm$ 1.29 | 82.94 $\pm$ 3.90 | 82.85 $\pm$ 3.71  | 94.20 $\pm$ 1.09 | 97.95 $\pm$ 0.22                   |
|               | ankle-boot                     | 92.70 $\pm$ 2.14 | 95.47 $\pm$ 0.98 | 91.70 $\pm$ 0.95 | 94.13 $\pm$ 1.02 | 90.41 $\pm$ 4.48  | 99.62 $\pm$ 0.06 | 99.87 $\pm$ 0.02                   |
|               | <i>average</i>                 | 90.65 $\pm$ 0.61 | 94.84 $\pm$ 0.19 | 91.09 $\pm$ 0.34 | 92.44 $\pm$ 0.28 | 83.70 $\pm$ 3.52  | 97.27 $\pm$ 0.08 | <b>98.19 <math>\pm</math> 0.03</b> |
| CIFAR10       | airplane                       | 93.13 $\pm$ 1.25 | 89.65 $\pm$ 0.54 | 93.14 $\pm$ 0.23 | 90.66 $\pm$ 0.65 | 85.56 $\pm$ 2.30  | 85.80 $\pm$ 0.42 | 94.36 $\pm$ 0.09                   |
|               | automobile                     | 79.77 $\pm$ 1.23 | 75.76 $\pm$ 0.26 | 78.90 $\pm$ 0.43 | 76.39 $\pm$ 0.88 | 89.17 $\pm$ 0.56  | 92.33 $\pm$ 0.64 | 98.60 $\pm$ 0.18                   |
|               | bird                           | 88.91 $\pm$ 0.57 | 90.79 $\pm$ 0.26 | 90.37 $\pm$ 0.32 | 91.41 $\pm$ 0.27 | 83.24 $\pm$ 1.60  | 86.14 $\pm$ 0.68 | 92.48 $\pm$ 0.42                   |
|               | cat                            | 88.13 $\pm$ 0.36 | 84.87 $\pm$ 0.29 | 88.08 $\pm$ 0.51 | 86.26 $\pm$ 0.24 | 85.36 $\pm$ 0.67  | 86.77 $\pm$ 0.69 | 91.71 $\pm$ 0.48                   |
|               | deer                           | 89.00 $\pm$ 1.23 | 91.86 $\pm$ 0.31 | 88.68 $\pm$ 0.33 | 91.95 $\pm$ 0.66 | 85.72 $\pm$ 0.91  | 90.25 $\pm$ 0.64 | 95.13 $\pm$ 0.22                   |
|               | dog                            | 86.79 $\pm$ 0.68 | 84.14 $\pm$ 0.33 | 87.85 $\pm$ 0.42 | 85.96 $\pm$ 0.71 | 85.77 $\pm$ 0.76  | 89.85 $\pm$ 0.64 | 95.53 $\pm$ 0.36                   |
|               | frog                           | 85.98 $\pm$ 1.25 | 88.24 $\pm$ 0.33 | 81.41 $\pm$ 0.70 | 86.31 $\pm$ 0.77 | 88.46 $\pm$ 1.31  | 89.95 $\pm$ 0.55 | 94.97 $\pm$ 0.33                   |
|               | horse                          | 83.21 $\pm$ 0.35 | 81.75 $\pm$ 0.32 | 83.11 $\pm$ 0.51 | 82.81 $\pm$ 0.38 | 87.56 $\pm$ 1.37  | 91.65 $\pm$ 0.79 | 97.88 $\pm$ 0.21                   |
|               | ship                           | 91.91 $\pm$ 1.41 | 91.06 $\pm$ 0.39 | 93.23 $\pm$ 0.40 | 91.08 $\pm$ 2.03 | 85.83 $\pm$ 4.03  | 91.51 $\pm$ 1.23 | 97.94 $\pm$ 0.13                   |
|               | truck                          | 80.33 $\pm$ 1.79 | 76.06 $\pm$ 0.39 | 79.39 $\pm$ 0.41 | 76.87 $\pm$ 0.92 | 88.83 $\pm$ 1.55  | 91.80 $\pm$ 0.40 | 97.13 $\pm$ 0.26                   |
|               | <i>average</i>                 | 86.71 $\pm$ 0.18 | 85.42 $\pm$ 0.07 | 86.42 $\pm$ 0.12 | 85.97 $\pm$ 0.22 | 86.55 $\pm$ 0.26  | 89.61 $\pm$ 0.24 | <b>95.57 <math>\pm</math> 0.09</b> |
| CIFAR100      | aquatic mammals                | 89.58 $\pm$ 0.78 | 88.64 $\pm$ 0.63 | 89.92 $\pm$ 0.55 | 89.82 $\pm$ 0.50 | 84.42 $\pm$ 0.67  | 87.55 $\pm$ 0.69 | 93.69 $\pm$ 0.43                   |
|               | fish                           | 90.56 $\pm$ 0.49 | 88.70 $\pm$ 0.10 | 89.81 $\pm$ 0.24 | 89.09 $\pm$ 0.74 | 82.78 $\pm$ 1.68  | 87.29 $\pm$ 0.22 | 92.90 $\pm$ 0.43                   |
|               | flowers                        | 79.81 $\pm$ 1.91 | 77.46 $\pm$ 0.39 | 77.04 $\pm$ 0.90 | 77.58 $\pm$ 1.47 | 87.93 $\pm$ 3.18  | 87.22 $\pm$ 0.56 | 94.23 $\pm$ 0.76                   |
|               | food containers                | 89.98 $\pm$ 0.75 | 88.82 $\pm$ 0.21 | 89.99 $\pm$ 0.40 | 88.40 $\pm$ 1.29 | 84.05 $\pm$ 0.51  | 86.71 $\pm$ 0.53 | 95.20 $\pm$ 0.15                   |
|               | fruit and vegetables           | 86.66 $\pm$ 2.13 | 82.42 $\pm$ 0.46 | 86.70 $\pm$ 0.85 | 83.84 $\pm$ 2.54 | 87.39 $\pm$ 3.05  | 86.38 $\pm$ 1.08 | 94.20 $\pm$ 0.49                   |
|               | household electrical devices   | 86.84 $\pm$ 0.82 | 82.53 $\pm$ 0.44 | 87.56 $\pm$ 0.67 | 83.05 $\pm$ 0.78 | 85.59 $\pm$ 1.39  | 85.04 $\pm$ 0.69 | 90.26 $\pm$ 0.89                   |
|               | household furniture            | 88.31 $\pm$ 1.06 | 85.98 $\pm$ 0.95 | 90.13 $\pm$ 0.81 | 86.61 $\pm$ 1.12 | 85.47 $\pm$ 1.94  | 83.98 $\pm$ 0.55 | 95.50 $\pm$ 0.26                   |
|               | inserts                        | 86.07 $\pm$ 1.42 | 84.69 $\pm$ 0.66 | 83.11 $\pm$ 0.68 | 84.65 $\pm$ 0.55 | 84.54 $\pm$ 1.69  | 85.69 $\pm$ 0.54 | 92.90 $\pm$ 0.38                   |
|               | large carnivores               | 83.60 $\pm$ 1.30 | 85.20 $\pm$ 1.17 | 84.29 $\pm$ 0.52 | 85.24 $\pm$ 0.34 | 87.99 $\pm$ 0.64  | 88.16 $\pm$ 0.67 | 96.71 $\pm$ 0.57                   |
|               | large man-made outdoor things  | 89.03 $\pm$ 1.01 | 88.88 $\pm$ 0.62 | 90.99 $\pm$ 0.64 | 90.03 $\pm$ 1.02 | 89.23 $\pm$ 1.84  | 90.08 $\pm$ 1.09 | 97.07 $\pm$ 0.39                   |
|               | large natural outdoor scenes   | 96.06 $\pm$ 0.44 | 95.83 $\pm$ 0.36 | 95.80 $\pm$ 0.09 | 95.86 $\pm$ 0.46 | 84.94 $\pm$ 1.29  | 87.66 $\pm$ 2.09 | 96.62 $\pm$ 0.17                   |
|               | large omnivores and herbivores | 84.52 $\pm$ 0.58 | 84.66 $\pm$ 0.42 | 86.41 $\pm$ 0.24 | 86.33 $\pm$ 0.83 | 87.90 $\pm$ 1.20  | 86.69 $\pm$ 0.33 | 95.92 $\pm$ 0.35                   |
|               | medium-sized mammals           | 85.32 $\pm$ 2.51 | 86.27 $\pm$ 0.53 | 86.16 $\pm$ 0.53 | 87.70 $\pm$ 0.96 | 88.19 $\pm$ 0.81  | 87.71 $\pm$ 0.67 | 95.60 $\pm$ 0.45                   |
|               | non-insert invertebrates       | 86.59 $\pm$ 0.56 | 88.75 $\pm$ 0.33 | 86.38 $\pm$ 0.34 | 87.60 $\pm$ 0.27 | 84.10 $\pm$ 0.83  | 84.73 $\pm$ 0.22 | 89.21 $\pm$ 0.44                   |
|               | people                         | 83.21 $\pm$ 1.09 | 79.23 $\pm$ 0.45 | 83.02 $\pm$ 0.58 | 81.10 $\pm$ 0.88 | 87.02 $\pm$ 1.19  | 85.68 $\pm$ 0.85 | 97.77 $\pm$ 0.28                   |
|               | reptiles                       | 85.11 $\pm$ 1.00 | 86.96 $\pm$ 0.52 | 85.47 $\pm$ 0.67 | 87.11 $\pm$ 0.29 | 85.24 $\pm$ 0.80  | 86.28 $\pm$ 0.71 | 91.50 $\pm$ 0.98                   |
|               | small mammals                  | 87.19 $\pm$ 1.29 | 88.75 $\pm$ 0.57 | 87.90 $\pm$ 0.31 | 89.74 $\pm$ 0.89 | 86.54 $\pm$ 1.07  | 88.02 $\pm$ 1.04 | 93.44 $\pm$ 0.66                   |
|               | trees                          | 87.11 $\pm$ 1.28 | 87.93 $\pm$ 0.70 | 85.30 $\pm$ 1.30 | 87.57 $\pm$ 0.57 | 88.86 $\pm$ 1.87  | 92.10 $\pm$ 0.93 | 98.29 $\pm$ 0.20                   |
|               | vehicles 1                     | 78.41 $\pm$ 0.43 | 78.54 $\pm$ 0.50 | 78.49 $\pm$ 0.44 | 78.54 $\pm$ 0.61 | 87.76 $\pm$ 1.00  | 87.64 $\pm$ 0.92 | 97.54 $\pm$ 0.20                   |
|               | vehicles 2                     | 84.10 $\pm$ 1.03 | 82.86 $\pm$ 0.49 | 85.59 $\pm$ 0.51 | 83.32 $\pm$ 0.29 | 85.62 $\pm$ 1.15  | 86.52 $\pm$ 0.47 | 96.28 $\pm$ 0.31                   |
|               | <i>average</i>                 | 86.40 $\pm$ 0.12 | 85.66 $\pm$ 0.16 | 86.50 $\pm$ 0.17 | 86.16 $\pm$ 0.19 | 86.28 $\pm$ 0.28  | 87.06 $\pm$ 0.16 | <b>94.74 <math>\pm</math> 0.12</b> |
| SVHN          | 0                              | 85.08 $\pm$ 0.68 | 87.99 $\pm$ 0.27 | 85.83 $\pm$ 0.21 | 86.33 $\pm$ 0.49 | 85.04 $\pm$ 0.53  | 94.59 $\pm$ 0.99 | 90.34 $\pm$ 0.92                   |
|               | 1                              | 86.55 $\pm$ 0.73 | 88.87 $\pm$ 0.27 | 87.53 $\pm$ 0.66 | 87.64 $\pm$ 0.28 | 84.60 $\pm$ 0.44  | 90.83 $\pm$ 0.77 | 92.93 $\pm$ 0.44                   |
|               | 2                              | 85.35 $\pm$ 0.52 | 86.55 $\pm$ 0.54 | 85.59 $\pm$ 0.32 | 86.07 $\pm$ 0.47 | 84.78 $\pm$ 0.44  | 93.57 $\pm$ 1.01 | 98.25 $\pm$ 0.14                   |
|               | 3                              | 85.01 $\pm$ 0.32 | 85.55 $\pm$ 0.22 | 84.80 $\pm$ 0.22 | 84.89 $\pm$ 0.20 | 85.05 $\pm$ 0.20  | 91.88 $\pm$ 0.83 | 97.36 $\pm$ 0.07                   |
|               | 4                              | 85.84 $\pm$ 0.43 | 86.98 $\pm$ 0.57 | 86.55 $\pm$ 0.25 | 86.90 $\pm$ 0.51 | 84.65 $\pm$ 0.66  | 92.35 $\pm$ 0.65 | 98.31 $\pm$ 0.07                   |
|               | 5                              | 84.74 $\pm$ 0.28 | 85.90 $\pm$ 0.27 | 84.73 $\pm$ 0.38 | 85.18 $\pm$ 0.32 | 84.79 $\pm$ 0.22  | 92.55 $\pm$ 0.69 | 98.28 $\pm$ 0.05                   |
|               | 6                              | 84.80 $\pm$ 0.44 | 85.71 $\pm$ 0.32 | 84.26 $\pm$ 0.40 | 85.15 $\pm$ 0.35 | 76.69 $\pm$ 17.10 | 93.28 $\pm$ 0.40 | 97.63 $\pm$ 0.06                   |
|               | 7                              | 86.73 $\pm$ 0.26 | 87.33 $\pm$ 0.22 | 86.26 $\pm$ 0.37 | 86.66 $\pm$ 0.24 | 85.15 $\pm$ 0.67  | 94.86 $\pm$ 0.33 | 98.44 $\pm$ 0.10                   |
|               | 8                              | 84.51 $\pm$ 0.44 | 86.13 $\pm$ 0.61 | 84.38 $\pm$ 0.39 | 84.97 $\pm$ 0.50 | 85.39 $\pm$ 0.42  | 92.38 $\pm$ 0.76 | 92.25 $\pm$ 0.59                   |
|               | 9                              | 85.01 $\pm$ 0.32 | 86.40 $\pm$ 0.40 | 84.95 $\pm$ 0.25 | 85.47 $\pm$ 0.33 | 85.22 $\pm$ 0.46  | 93.74 $\pm$ 0.56 | 97.79 $\pm$ 0.10                   |
|               | <i>average</i>                 | 85.36 $\pm$ 0.13 | 86.74 $\pm$ 0.13 | 85.49 $\pm$ 0.06 | 85.93 $\pm$ 0.14 | 84.14 $\pm$ 1.61  | 93.00 $\pm$ 0.14 | <b>96.16 <math>\pm</math> 0.14</b> |

Table 9: AUPR-in (%) (inliers as positive class) when  $\rho = 0.2$ 

| Dataset       | Class name                     | CAE              | CAE-IF           | DRAE             | RDAE             | DAGMM             | SSD-IF           | $E^3$ Outlier                      |
|---------------|--------------------------------|------------------|------------------|------------------|------------------|-------------------|------------------|------------------------------------|
| MNIST         | 0                              | 74.97 $\pm$ 2.44 | 96.38 $\pm$ 1.11 | 80.59 $\pm$ 5.14 | 77.65 $\pm$ 2.76 | 88.47 $\pm$ 11.29 | 96.26 $\pm$ 0.83 | 97.04 $\pm$ 0.23                   |
|               | 1                              | 99.70 $\pm$ 0.06 | 99.80 $\pm$ 0.03 | 95.74 $\pm$ 6.62 | 99.71 $\pm$ 0.02 | 96.79 $\pm$ 4.20  | 98.54 $\pm$ 0.19 | 96.48 $\pm$ 0.38                   |
|               | 2                              | 76.10 $\pm$ 1.94 | 88.03 $\pm$ 1.40 | 79.41 $\pm$ 4.76 | 78.15 $\pm$ 1.84 | 80.55 $\pm$ 0.75  | 95.92 $\pm$ 0.45 | 97.62 $\pm$ 0.13                   |
|               | 3                              | 80.36 $\pm$ 2.15 | 93.59 $\pm$ 0.48 | 89.29 $\pm$ 5.38 | 81.91 $\pm$ 1.41 | 84.43 $\pm$ 4.65  | 97.59 $\pm$ 0.30 | 99.06 $\pm$ 0.02                   |
|               | 4                              | 84.94 $\pm$ 2.11 | 92.40 $\pm$ 0.51 | 88.24 $\pm$ 3.26 | 85.72 $\pm$ 0.93 | 86.39 $\pm$ 5.14  | 98.22 $\pm$ 0.13 | 98.12 $\pm$ 0.11                   |
|               | 5                              | 79.99 $\pm$ 1.05 | 90.37 $\pm$ 0.75 | 82.44 $\pm$ 2.56 | 80.37 $\pm$ 0.96 | 81.66 $\pm$ 1.46  | 96.60 $\pm$ 0.31 | 96.93 $\pm$ 0.26                   |
|               | 6                              | 82.18 $\pm$ 0.84 | 96.41 $\pm$ 0.65 | 84.39 $\pm$ 5.21 | 83.41 $\pm$ 1.49 | 88.85 $\pm$ 6.41  | 98.75 $\pm$ 0.23 | 99.00 $\pm$ 0.02                   |
|               | 7                              | 89.59 $\pm$ 1.97 | 96.60 $\pm$ 0.33 | 90.03 $\pm$ 4.31 | 91.41 $\pm$ 0.77 | 90.43 $\pm$ 3.06  | 97.49 $\pm$ 0.31 | 97.62 $\pm$ 0.14                   |
|               | 8                              | 73.67 $\pm$ 1.11 | 86.72 $\pm$ 1.16 | 86.62 $\pm$ 2.82 | 76.77 $\pm$ 1.10 | 82.41 $\pm$ 5.55  | 94.87 $\pm$ 0.22 | 95.68 $\pm$ 0.33                   |
|               | 9                              | 85.85 $\pm$ 0.96 | 95.86 $\pm$ 0.73 | 89.33 $\pm$ 2.23 | 86.86 $\pm$ 0.83 | 84.17 $\pm$ 4.65  | 98.25 $\pm$ 0.22 | 98.52 $\pm$ 0.08                   |
|               | <i>average</i>                 | 82.73 $\pm$ 0.46 | 93.62 $\pm$ 0.29 | 86.61 $\pm$ 1.16 | 84.20 $\pm$ 0.30 | 86.42 $\pm$ 1.04  | 97.25 $\pm$ 0.09 | <b>97.61 <math>\pm</math> 0.05</b> |
| Fashion-MNIST | t-shirt                        | 79.47 $\pm$ 3.87 | 94.88 $\pm$ 0.54 | 85.85 $\pm$ 2.34 | 90.60 $\pm$ 1.11 | 85.04 $\pm$ 8.64  | 95.88 $\pm$ 0.27 | 97.49 $\pm$ 0.14                   |
|               | trouser                        | 98.61 $\pm$ 0.28 | 98.63 $\pm$ 0.07 | 97.26 $\pm$ 1.47 | 98.78 $\pm$ 0.37 | 92.16 $\pm$ 5.52  | 99.27 $\pm$ 0.11 | 99.20 $\pm$ 0.04                   |
|               | pullover                       | 81.64 $\pm$ 1.83 | 93.13 $\pm$ 0.52 | 83.72 $\pm$ 1.73 | 88.20 $\pm$ 1.94 | 76.63 $\pm$ 5.58  | 95.32 $\pm$ 0.17 | 96.38 $\pm$ 0.23                   |
|               | dress                          | 89.07 $\pm$ 2.67 | 93.42 $\pm$ 0.38 | 92.28 $\pm$ 0.66 | 91.01 $\pm$ 1.22 | 92.88 $\pm$ 0.73  | 95.31 $\pm$ 0.62 | 95.13 $\pm$ 0.24                   |
|               | coat                           | 85.34 $\pm$ 2.51 | 92.65 $\pm$ 0.66 | 82.21 $\pm$ 1.53 | 85.47 $\pm$ 3.00 | 77.65 $\pm$ 8.80  | 96.03 $\pm$ 0.23 | 95.90 $\pm$ 0.36                   |
|               | sandal                         | 85.59 $\pm$ 3.24 | 83.80 $\pm$ 0.99 | 89.40 $\pm$ 1.67 | 85.76 $\pm$ 3.66 | 93.39 $\pm$ 2.26  | 93.78 $\pm$ 1.06 | 97.27 $\pm$ 0.34                   |
|               | shirt                          | 79.39 $\pm$ 1.21 | 92.07 $\pm$ 0.25 | 82.74 $\pm$ 0.78 | 86.33 $\pm$ 0.64 | 82.00 $\pm$ 4.07  | 92.11 $\pm$ 0.37 | 94.17 $\pm$ 0.18                   |
|               | sneaker                        | 93.77 $\pm$ 1.74 | 96.58 $\pm$ 0.17 | 91.06 $\pm$ 7.45 | 96.70 $\pm$ 0.68 | 94.36 $\pm$ 3.09  | 99.39 $\pm$ 0.07 | 99.69 $\pm$ 0.04                   |
|               | bag                            | 75.16 $\pm$ 0.97 | 82.75 $\pm$ 1.13 | 76.55 $\pm$ 1.18 | 77.49 $\pm$ 2.42 | 84.12 $\pm$ 6.97  | 89.34 $\pm$ 1.28 | 96.16 $\pm$ 0.20                   |
|               | ankle-boot                     | 85.28 $\pm$ 2.62 | 93.90 $\pm$ 0.74 | 87.45 $\pm$ 3.25 | 91.47 $\pm$ 1.61 | 88.35 $\pm$ 7.66  | 99.27 $\pm$ 0.07 | 99.78 $\pm$ 0.01                   |
|               | <i>average</i>                 | 85.33 $\pm$ 0.82 | 92.18 $\pm$ 0.30 | 86.85 $\pm$ 0.92 | 89.18 $\pm$ 0.67 | 86.66 $\pm$ 2.70  | 95.57 $\pm$ 0.13 | <b>97.12 <math>\pm</math> 0.07</b> |
| CIFAR10       | airplane                       | 87.49 $\pm$ 2.97 | 85.68 $\pm$ 0.29 | 90.18 $\pm$ 0.40 | 86.53 $\pm$ 2.07 | 80.45 $\pm$ 2.69  | 80.71 $\pm$ 1.41 | 91.84 $\pm$ 0.12                   |
|               | automobile                     | 74.55 $\pm$ 2.35 | 69.43 $\pm$ 0.41 | 72.64 $\pm$ 0.54 | 69.39 $\pm$ 0.59 | 85.21 $\pm$ 0.90  | 87.61 $\pm$ 1.62 | 97.81 $\pm$ 0.26                   |
|               | bird                           | 85.55 $\pm$ 1.21 | 87.48 $\pm$ 0.39 | 87.19 $\pm$ 0.26 | 88.36 $\pm$ 0.70 | 78.72 $\pm$ 3.08  | 81.85 $\pm$ 1.21 | 88.46 $\pm$ 0.60                   |
|               | cat                            | 83.47 $\pm$ 1.39 | 79.75 $\pm$ 0.43 | 83.39 $\pm$ 0.23 | 80.96 $\pm$ 0.99 | 81.04 $\pm$ 0.57  | 81.64 $\pm$ 1.59 | 86.40 $\pm$ 0.90                   |
|               | deer                           | 84.68 $\pm$ 1.46 | 88.80 $\pm$ 0.48 | 84.68 $\pm$ 0.55 | 89.23 $\pm$ 0.32 | 80.45 $\pm$ 2.05  | 85.85 $\pm$ 0.99 | 92.67 $\pm$ 0.38                   |
|               | dog                            | 81.40 $\pm$ 1.10 | 78.84 $\pm$ 0.38 | 83.47 $\pm$ 0.27 | 80.85 $\pm$ 0.42 | 81.92 $\pm$ 1.87  | 84.96 $\pm$ 0.72 | 92.69 $\pm$ 0.78                   |
|               | frog                           | 79.95 $\pm$ 1.91 | 83.91 $\pm$ 0.40 | 75.20 $\pm$ 0.91 | 80.68 $\pm$ 1.27 | 82.23 $\pm$ 3.45  | 85.67 $\pm$ 0.95 | 91.92 $\pm$ 0.69                   |
|               | horse                          | 76.93 $\pm$ 0.91 | 75.62 $\pm$ 0.38 | 77.20 $\pm$ 0.42 | 76.05 $\pm$ 0.31 | 80.93 $\pm$ 3.71  | 87.15 $\pm$ 1.26 | 96.84 $\pm$ 0.15                   |
|               | ship                           | 88.52 $\pm$ 1.89 | 87.82 $\pm$ 0.31 | 90.10 $\pm$ 0.42 | 88.30 $\pm$ 2.30 | 80.45 $\pm$ 3.22  | 87.20 $\pm$ 1.11 | 96.80 $\pm$ 0.23                   |
|               | truck                          | 73.74 $\pm$ 1.77 | 69.34 $\pm$ 0.28 | 72.46 $\pm$ 0.40 | 70.08 $\pm$ 0.85 | 86.16 $\pm$ 2.99  | 86.91 $\pm$ 0.99 | 95.47 $\pm$ 0.24                   |
|               | <i>average</i>                 | 81.63 $\pm$ 0.68 | 80.67 $\pm$ 0.12 | 81.65 $\pm$ 0.16 | 81.04 $\pm$ 0.44 | 81.76 $\pm$ 0.37  | 84.95 $\pm$ 0.40 | <b>93.09 <math>\pm</math> 0.07</b> |
| CIFAR100      | aquatic mammals                | 86.21 $\pm$ 1.42 | 84.67 $\pm$ 0.73 | 86.52 $\pm$ 0.95 | 86.19 $\pm$ 0.70 | 80.32 $\pm$ 1.68  | 82.09 $\pm$ 1.06 | 91.36 $\pm$ 0.59                   |
|               | fish                           | 86.59 $\pm$ 1.63 | 84.82 $\pm$ 0.50 | 86.01 $\pm$ 0.54 | 85.33 $\pm$ 1.31 | 77.60 $\pm$ 1.29  | 82.61 $\pm$ 0.88 | 89.22 $\pm$ 0.57                   |
|               | flowers                        | 73.48 $\pm$ 1.73 | 71.14 $\pm$ 0.35 | 70.15 $\pm$ 0.53 | 71.71 $\pm$ 1.57 | 85.61 $\pm$ 2.77  | 81.89 $\pm$ 0.64 | 92.39 $\pm$ 0.66                   |
|               | food containers                | 85.89 $\pm$ 1.07 | 85.03 $\pm$ 0.34 | 86.17 $\pm$ 0.59 | 84.83 $\pm$ 1.46 | 76.56 $\pm$ 1.36  | 79.91 $\pm$ 1.14 | 92.83 $\pm$ 0.48                   |
|               | fruit and vegetables           | 81.83 $\pm$ 2.95 | 76.13 $\pm$ 0.80 | 82.14 $\pm$ 0.66 | 77.08 $\pm$ 1.17 | 84.89 $\pm$ 1.41  | 81.00 $\pm$ 0.83 | 91.56 $\pm$ 0.55                   |
|               | household electrical devices   | 81.54 $\pm$ 0.72 | 76.74 $\pm$ 0.44 | 83.08 $\pm$ 0.24 | 78.14 $\pm$ 1.20 | 80.02 $\pm$ 1.48  | 79.98 $\pm$ 1.13 | 85.70 $\pm$ 0.90                   |
|               | household furniture            | 83.88 $\pm$ 1.35 | 81.34 $\pm$ 0.39 | 86.10 $\pm$ 0.56 | 82.54 $\pm$ 1.14 | 79.12 $\pm$ 1.49  | 78.48 $\pm$ 0.44 | 93.42 $\pm$ 0.60                   |
|               | inserts                        | 81.45 $\pm$ 1.41 | 79.14 $\pm$ 0.84 | 77.43 $\pm$ 0.30 | 79.05 $\pm$ 1.09 | 79.85 $\pm$ 1.70  | 81.06 $\pm$ 0.79 | 89.13 $\pm$ 0.37                   |
|               | large carnivores               | 77.78 $\pm$ 2.40 | 79.79 $\pm$ 0.94 | 78.84 $\pm$ 0.99 | 80.69 $\pm$ 1.68 | 82.53 $\pm$ 0.47  | 82.99 $\pm$ 0.51 | 95.06 $\pm$ 0.77                   |
|               | large man-made outdoor things  | 85.71 $\pm$ 1.19 | 84.70 $\pm$ 0.85 | 87.59 $\pm$ 0.84 | 86.16 $\pm$ 0.70 | 83.65 $\pm$ 3.58  | 85.35 $\pm$ 1.67 | 95.96 $\pm$ 0.33                   |
|               | large natural outdoor scenes   | 92.62 $\pm$ 1.64 | 94.23 $\pm$ 0.45 | 93.83 $\pm$ 0.42 | 93.66 $\pm$ 1.15 | 79.56 $\pm$ 2.36  | 83.76 $\pm$ 0.56 | 95.19 $\pm$ 0.24                   |
|               | large omnivores and herbivores | 79.86 $\pm$ 1.25 | 79.65 $\pm$ 0.61 | 81.67 $\pm$ 0.66 | 81.93 $\pm$ 0.38 | 83.34 $\pm$ 1.00  | 82.92 $\pm$ 1.26 | 94.10 $\pm$ 0.23                   |
|               | medium-sized mammals           | 80.67 $\pm$ 1.43 | 81.90 $\pm$ 0.88 | 81.52 $\pm$ 0.92 | 84.62 $\pm$ 1.42 | 83.98 $\pm$ 0.80  | 83.85 $\pm$ 0.52 | 93.51 $\pm$ 0.64                   |
|               | non-insert invertebrates       | 81.85 $\pm$ 0.65 | 84.57 $\pm$ 0.68 | 81.29 $\pm$ 0.42 | 83.40 $\pm$ 0.69 | 78.09 $\pm$ 1.16  | 80.05 $\pm$ 0.81 | 85.12 $\pm$ 0.45                   |
|               | people                         | 79.03 $\pm$ 1.22 | 73.10 $\pm$ 0.82 | 77.58 $\pm$ 0.96 | 75.05 $\pm$ 0.86 | 83.46 $\pm$ 0.74  | 81.59 $\pm$ 1.15 | 96.89 $\pm$ 0.22                   |
|               | reptiles                       | 80.18 $\pm$ 0.42 | 82.50 $\pm$ 0.48 | 79.80 $\pm$ 0.48 | 82.49 $\pm$ 0.57 | 80.24 $\pm$ 0.70  | 81.10 $\pm$ 0.72 | 87.87 $\pm$ 0.76                   |
|               | small mammals                  | 82.46 $\pm$ 1.06 | 84.94 $\pm$ 0.23 | 83.51 $\pm$ 0.16 | 85.10 $\pm$ 0.31 | 81.45 $\pm$ 0.76  | 83.23 $\pm$ 0.18 | 90.23 $\pm$ 0.38                   |
|               | trees                          | 81.66 $\pm$ 1.55 | 83.32 $\pm$ 0.85 | 79.89 $\pm$ 1.34 | 81.95 $\pm$ 0.86 | 83.39 $\pm$ 1.57  | 87.89 $\pm$ 0.78 | 97.34 $\pm$ 0.12                   |
|               | vehicles 1                     | 71.50 $\pm$ 1.30 | 72.21 $\pm$ 0.36 | 71.77 $\pm$ 0.39 | 71.81 $\pm$ 0.35 | 84.25 $\pm$ 0.66  | 82.13 $\pm$ 1.36 | 96.29 $\pm$ 0.21                   |
|               | vehicles 2                     | 79.42 $\pm$ 1.47 | 77.37 $\pm$ 0.72 | 80.17 $\pm$ 0.79 | 78.12 $\pm$ 0.98 | 81.00 $\pm$ 1.61  | 80.52 $\pm$ 1.12 | 94.56 $\pm$ 0.40                   |
|               | <i>average</i>                 | 81.68 $\pm$ 0.48 | 80.86 $\pm$ 0.18 | 81.75 $\pm$ 0.19 | 81.49 $\pm$ 0.27 | 81.45 $\pm$ 0.42  | 82.12 $\pm$ 0.16 | <b>92.39 <math>\pm</math> 0.06</b> |
| SVHN          | 0                              | 79.72 $\pm$ 0.88 | 83.35 $\pm$ 0.43 | 80.28 $\pm$ 0.58 | 80.98 $\pm$ 0.39 | 80.18 $\pm$ 0.62  | 92.22 $\pm$ 0.83 | 83.28 $\pm$ 0.69                   |
|               | 1                              | 82.16 $\pm$ 0.24 | 84.88 $\pm$ 0.40 | 82.79 $\pm$ 0.47 | 83.16 $\pm$ 0.56 | 79.27 $\pm$ 0.41  | 86.72 $\pm$ 0.78 | 89.13 $\pm$ 0.26                   |
|               | 2                              | 79.92 $\pm$ 0.43 | 81.63 $\pm$ 0.45 | 80.50 $\pm$ 0.52 | 80.63 $\pm$ 0.43 | 79.39 $\pm$ 0.49  | 89.60 $\pm$ 1.25 | 97.01 $\pm$ 0.24                   |
|               | 3                              | 79.77 $\pm$ 0.20 | 80.49 $\pm$ 0.38 | 79.54 $\pm$ 0.25 | 79.83 $\pm$ 0.39 | 79.94 $\pm$ 0.24  | 86.73 $\pm$ 0.60 | 95.96 $\pm$ 0.16                   |
|               | 4                              | 80.81 $\pm$ 0.77 | 82.52 $\pm$ 0.19 | 81.74 $\pm$ 0.49 | 81.67 $\pm$ 0.48 | 80.16 $\pm$ 0.74  | 87.60 $\pm$ 1.59 | 97.21 $\pm$ 0.07                   |
|               | 5                              | 79.38 $\pm$ 0.39 | 81.11 $\pm$ 0.36 | 79.59 $\pm$ 0.28 | 80.06 $\pm$ 0.57 | 79.90 $\pm$ 0.23  | 88.96 $\pm$ 1.46 | 97.33 $\pm$ 0.10                   |
|               | 6                              | 79.69 $\pm$ 0.70 | 80.73 $\pm$ 0.41 | 78.99 $\pm$ 0.53 | 79.96 $\pm$ 0.32 | 79.85 $\pm$ 0.22  | 90.90 $\pm$ 0.49 | 96.13 $\pm$ 0.16                   |
|               | 7                              | 81.79 $\pm$ 0.56 | 82.59 $\pm$ 0.51 | 81.28 $\pm$ 0.38 | 81.85 $\pm$ 0.87 | 79.79 $\pm$ 0.49  | 91.38 $\pm$ 1.66 | 97.54 $\pm$ 0.10                   |
|               | 8                              | 79.41 $\pm$ 0.58 | 80.85 $\pm$ 0.36 | 79.18 $\pm$ 0.40 | 79.95 $\pm$ 0.45 | 80.19 $\pm$ 0.45  | 89.99 $\pm$ 1.35 | 87.76 $\pm$ 0.74                   |
|               | 9                              | 79.58 $\pm$ 0.38 | 82.25 $\pm$ 0.20 | 79.82 $\pm$ 0.48 | 80.56 $\pm$ 0.32 | 80.31 $\pm$ 0.21  | 91.03 $\pm$ 0.63 | 96.37 $\pm$ 0.15                   |
|               | <i>average</i>                 | 80.22 $\pm$ 0.21 | 82.04 $\pm$ 0.12 | 80.37 $\pm$ 0.19 | 80.87 $\pm$ 0.13 | 79.90 $\pm$ 0.09  | 89.51 $\pm$ 0.40 | <b>93.77 <math>\pm</math> 0.10</b> |

Table 10: AUPR-in (%) (inliers as positive class) when  $\rho = 0.25$ 

| Dataset       | Class name                     | CAE              | CAE-IF           | DRAE             | RDAE             | DAGMM             | SSD-IF           | $E^3$ Outlier                      |
|---------------|--------------------------------|------------------|------------------|------------------|------------------|-------------------|------------------|------------------------------------|
| MNIST         | 0                              | 68.43 $\pm$ 2.90 | 93.31 $\pm$ 1.11 | 79.59 $\pm$ 6.89 | 71.32 $\pm$ 1.69 | 82.83 $\pm$ 13.56 | 94.19 $\pm$ 0.57 | 94.53 $\pm$ 0.80                   |
|               | 1                              | 99.41 $\pm$ 0.29 | 99.56 $\pm$ 0.09 | 99.08 $\pm$ 0.22 | 99.26 $\pm$ 0.32 | 91.93 $\pm$ 8.24  | 97.73 $\pm$ 0.46 | 93.21 $\pm$ 0.28                   |
|               | 2                              | 69.97 $\pm$ 0.99 | 81.25 $\pm$ 2.79 | 77.27 $\pm$ 6.77 | 72.33 $\pm$ 1.61 | 72.60 $\pm$ 4.03  | 92.85 $\pm$ 0.63 | 96.55 $\pm$ 0.27                   |
|               | 3                              | 73.61 $\pm$ 1.63 | 89.74 $\pm$ 1.20 | 79.89 $\pm$ 6.58 | 75.84 $\pm$ 1.28 | 76.36 $\pm$ 3.77  | 96.17 $\pm$ 0.43 | 98.51 $\pm$ 0.16                   |
|               | 4                              | 77.46 $\pm$ 1.68 | 88.61 $\pm$ 1.56 | 77.39 $\pm$ 1.09 | 80.49 $\pm$ 1.38 | 82.88 $\pm$ 6.21  | 96.82 $\pm$ 0.22 | 97.38 $\pm$ 0.12                   |
|               | 5                              | 74.59 $\pm$ 1.56 | 87.23 $\pm$ 0.97 | 80.98 $\pm$ 7.39 | 77.81 $\pm$ 1.71 | 75.65 $\pm$ 2.15  | 93.77 $\pm$ 0.70 | 95.53 $\pm$ 0.20                   |
|               | 6                              | 76.49 $\pm$ 1.54 | 93.81 $\pm$ 0.80 | 78.78 $\pm$ 6.15 | 80.51 $\pm$ 1.71 | 79.84 $\pm$ 8.62  | 97.71 $\pm$ 0.35 | 98.53 $\pm$ 0.08                   |
|               | 7                              | 86.15 $\pm$ 2.66 | 95.06 $\pm$ 0.56 | 88.77 $\pm$ 2.40 | 88.79 $\pm$ 2.35 | 83.74 $\pm$ 4.47  | 96.14 $\pm$ 0.49 | 96.57 $\pm$ 0.10                   |
|               | 8                              | 65.42 $\pm$ 2.36 | 83.58 $\pm$ 1.80 | 68.20 $\pm$ 1.99 | 67.34 $\pm$ 1.03 | 75.94 $\pm$ 1.70  | 92.64 $\pm$ 0.69 | 93.53 $\pm$ 0.38                   |
|               | 9                              | 81.28 $\pm$ 1.50 | 94.30 $\pm$ 0.62 | 82.02 $\pm$ 5.55 | 83.48 $\pm$ 1.83 | 79.41 $\pm$ 4.41  | 97.43 $\pm$ 0.32 | 98.02 $\pm$ 0.08                   |
|               | <i>average</i>                 | 77.28 $\pm$ 0.58 | 90.64 $\pm$ 0.25 | 81.20 $\pm$ 2.15 | 79.72 $\pm$ 0.39 | 80.12 $\pm$ 1.05  | 95.55 $\pm$ 0.12 | <b>96.24 <math>\pm</math> 0.13</b> |
| Fashion-MNIST | t-shirt                        | 74.97 $\pm$ 3.25 | 93.61 $\pm$ 0.30 | 82.09 $\pm$ 4.37 | 84.85 $\pm$ 2.79 | 81.34 $\pm$ 11.32 | 93.85 $\pm$ 0.97 | 96.28 $\pm$ 0.26                   |
|               | trouser                        | 98.11 $\pm$ 0.26 | 97.42 $\pm$ 0.43 | 93.37 $\pm$ 5.85 | 98.32 $\pm$ 0.39 | 82.72 $\pm$ 6.82  | 98.81 $\pm$ 0.10 | 98.69 $\pm$ 0.10                   |
|               | pullover                       | 73.55 $\pm$ 2.51 | 91.31 $\pm$ 0.25 | 78.43 $\pm$ 2.18 | 84.42 $\pm$ 2.81 | 69.98 $\pm$ 6.86  | 93.41 $\pm$ 0.36 | 95.22 $\pm$ 0.50                   |
|               | dress                          | 86.67 $\pm$ 1.22 | 91.20 $\pm$ 0.42 | 89.62 $\pm$ 0.53 | 88.87 $\pm$ 1.90 | 75.80 $\pm$ 8.88  | 92.87 $\pm$ 1.09 | 93.04 $\pm$ 0.30                   |
|               | coat                           | 79.32 $\pm$ 5.13 | 89.22 $\pm$ 0.41 | 76.50 $\pm$ 1.24 | 81.75 $\pm$ 2.45 | 74.10 $\pm$ 6.64  | 94.96 $\pm$ 0.39 | 94.24 $\pm$ 0.15                   |
|               | sandal                         | 80.99 $\pm$ 5.04 | 78.53 $\pm$ 1.17 | 85.25 $\pm$ 1.69 | 83.84 $\pm$ 3.36 | 88.33 $\pm$ 5.10  | 90.77 $\pm$ 0.95 | 93.72 $\pm$ 3.79                   |
|               | shirt                          | 73.97 $\pm$ 2.18 | 89.59 $\pm$ 0.22 | 77.18 $\pm$ 0.98 | 83.91 $\pm$ 1.72 | 78.66 $\pm$ 2.45  | 88.85 $\pm$ 0.53 | 91.85 $\pm$ 0.19                   |
|               | sneaker                        | 91.28 $\pm$ 1.62 | 94.83 $\pm$ 0.56 | 93.87 $\pm$ 1.87 | 94.50 $\pm$ 0.71 | 84.41 $\pm$ 16.75 | 98.96 $\pm$ 0.11 | 99.56 $\pm$ 0.04                   |
|               | bag                            | 67.32 $\pm$ 3.51 | 77.29 $\pm$ 1.07 | 70.34 $\pm$ 1.87 | 69.07 $\pm$ 3.68 | 73.81 $\pm$ 5.72  | 83.51 $\pm$ 1.53 | 93.29 $\pm$ 0.27                   |
|               | ankle-boot                     | 82.61 $\pm$ 3.86 | 89.30 $\pm$ 2.15 | 83.67 $\pm$ 1.14 | 87.32 $\pm$ 2.84 | 76.99 $\pm$ 16.10 | 98.68 $\pm$ 0.18 | 99.62 $\pm$ 0.02                   |
|               | <i>average</i>                 | 80.88 $\pm$ 1.12 | 89.23 $\pm$ 0.19 | 83.03 $\pm$ 0.57 | 85.69 $\pm$ 1.21 | 78.61 $\pm$ 5.70  | 93.47 $\pm$ 0.22 | <b>95.55 <math>\pm</math> 0.30</b> |
| CIFAR10       | airplane                       | 85.96 $\pm$ 1.89 | 81.64 $\pm$ 0.66 | 87.27 $\pm$ 0.64 | 82.48 $\pm$ 2.27 | 73.15 $\pm$ 3.79  | 74.58 $\pm$ 0.66 | 88.46 $\pm$ 0.46                   |
|               | automobile                     | 68.41 $\pm$ 1.34 | 63.41 $\pm$ 0.18 | 66.65 $\pm$ 0.40 | 63.01 $\pm$ 0.12 | 81.51 $\pm$ 2.01  | 83.36 $\pm$ 0.98 | 96.46 $\pm$ 0.39                   |
|               | bird                           | 80.95 $\pm$ 0.84 | 84.00 $\pm$ 0.40 | 83.27 $\pm$ 0.22 | 84.55 $\pm$ 0.41 | 72.23 $\pm$ 1.08  | 76.58 $\pm$ 0.80 | 84.27 $\pm$ 0.96                   |
|               | cat                            | 79.72 $\pm$ 0.46 | 74.83 $\pm$ 0.39 | 79.48 $\pm$ 0.33 | 76.01 $\pm$ 1.11 | 76.03 $\pm$ 2.01  | 76.88 $\pm$ 0.73 | 79.62 $\pm$ 0.75                   |
|               | deer                           | 80.72 $\pm$ 1.83 | 85.66 $\pm$ 0.52 | 80.24 $\pm$ 0.90 | 84.93 $\pm$ 0.34 | 75.17 $\pm$ 1.77  | 81.14 $\pm$ 0.60 | 89.54 $\pm$ 0.75                   |
|               | dog                            | 76.43 $\pm$ 0.49 | 73.44 $\pm$ 0.49 | 78.95 $\pm$ 0.40 | 76.09 $\pm$ 0.47 | 78.07 $\pm$ 2.05  | 80.30 $\pm$ 1.10 | 89.76 $\pm$ 0.63                   |
|               | frog                           | 74.11 $\pm$ 1.68 | 79.65 $\pm$ 0.45 | 69.21 $\pm$ 0.26 | 77.22 $\pm$ 1.32 | 76.91 $\pm$ 3.06  | 81.12 $\pm$ 1.47 | 87.59 $\pm$ 1.17                   |
|               | horse                          | 71.03 $\pm$ 1.22 | 69.98 $\pm$ 0.59 | 71.84 $\pm$ 0.49 | 70.49 $\pm$ 0.67 | 77.98 $\pm$ 2.56  | 83.49 $\pm$ 1.22 | 95.09 $\pm$ 0.54                   |
|               | ship                           | 83.84 $\pm$ 3.15 | 84.25 $\pm$ 0.30 | 87.07 $\pm$ 0.57 | 85.93 $\pm$ 1.80 | 74.81 $\pm$ 4.09  | 82.80 $\pm$ 2.27 | 95.54 $\pm$ 0.39                   |
|               | truck                          | 67.61 $\pm$ 1.06 | 63.23 $\pm$ 0.28 | 66.66 $\pm$ 0.41 | 63.40 $\pm$ 0.99 | 80.15 $\pm$ 4.09  | 81.45 $\pm$ 1.04 | 93.77 $\pm$ 0.23                   |
|               | <i>average</i>                 | 76.88 $\pm$ 0.44 | 76.01 $\pm$ 0.09 | 77.06 $\pm$ 0.16 | 76.41 $\pm$ 0.20 | 76.60 $\pm$ 1.14  | 80.17 $\pm$ 0.40 | <b>90.01 <math>\pm</math> 0.13</b> |
| CIFAR100      | aquatic mammals                | 80.65 $\pm$ 1.18 | 80.59 $\pm$ 0.58 | 82.52 $\pm$ 0.16 | 81.63 $\pm$ 1.35 | 74.03 $\pm$ 2.11  | 77.40 $\pm$ 0.69 | 88.19 $\pm$ 0.48                   |
|               | fish                           | 84.10 $\pm$ 1.13 | 80.64 $\pm$ 0.75 | 82.23 $\pm$ 0.86 | 81.47 $\pm$ 1.35 | 70.81 $\pm$ 2.32  | 78.29 $\pm$ 1.76 | 86.18 $\pm$ 0.88                   |
|               | flowers                        | 66.40 $\pm$ 1.94 | 65.18 $\pm$ 0.42 | 63.89 $\pm$ 0.52 | 65.71 $\pm$ 1.49 | 76.80 $\pm$ 5.94  | 78.70 $\pm$ 1.44 | 88.49 $\pm$ 0.95                   |
|               | food containers                | 82.73 $\pm$ 1.29 | 80.33 $\pm$ 0.63 | 82.31 $\pm$ 0.83 | 78.51 $\pm$ 1.88 | 72.55 $\pm$ 2.73  | 75.17 $\pm$ 1.04 | 89.88 $\pm$ 0.68                   |
|               | fruit and vegetables           | 78.61 $\pm$ 2.97 | 70.72 $\pm$ 0.72 | 77.33 $\pm$ 0.79 | 72.15 $\pm$ 1.43 | 79.63 $\pm$ 2.03  | 76.06 $\pm$ 1.09 | 88.94 $\pm$ 0.60                   |
|               | household electrical devices   | 78.89 $\pm$ 0.79 | 70.99 $\pm$ 0.53 | 78.45 $\pm$ 0.55 | 72.59 $\pm$ 1.81 | 75.05 $\pm$ 2.06  | 74.56 $\pm$ 0.77 | 79.91 $\pm$ 1.24                   |
|               | household furniture            | 81.66 $\pm$ 0.49 | 75.85 $\pm$ 0.55 | 81.62 $\pm$ 0.89 | 76.59 $\pm$ 2.25 | 76.05 $\pm$ 3.53  | 72.34 $\pm$ 0.91 | 90.84 $\pm$ 0.45                   |
|               | inserts                        | 74.61 $\pm$ 1.85 | 74.07 $\pm$ 0.72 | 72.33 $\pm$ 0.66 | 73.34 $\pm$ 1.28 | 73.58 $\pm$ 1.79  | 76.52 $\pm$ 1.02 | 85.27 $\pm$ 0.61                   |
|               | large carnivores               | 73.04 $\pm$ 1.63 | 74.79 $\pm$ 0.92 | 73.28 $\pm$ 0.66 | 75.18 $\pm$ 1.04 | 78.87 $\pm$ 0.99  | 78.67 $\pm$ 1.29 | 92.58 $\pm$ 0.67                   |
|               | large man-made outdoor things  | 80.89 $\pm$ 3.13 | 80.51 $\pm$ 0.86 | 83.96 $\pm$ 1.12 | 81.95 $\pm$ 1.64 | 80.82 $\pm$ 1.83  | 79.63 $\pm$ 1.30 | 94.79 $\pm$ 0.41                   |
|               | large natural outdoor scenes   | 92.06 $\pm$ 1.08 | 92.16 $\pm$ 0.22 | 92.15 $\pm$ 0.32 | 91.42 $\pm$ 0.91 | 73.87 $\pm$ 2.97  | 80.46 $\pm$ 0.97 | 93.87 $\pm$ 0.30                   |
|               | large omnivores and herbivores | 74.09 $\pm$ 1.53 | 74.64 $\pm$ 0.37 | 76.06 $\pm$ 0.45 | 76.89 $\pm$ 0.88 | 78.61 $\pm$ 2.10  | 77.21 $\pm$ 0.64 | 92.37 $\pm$ 0.50                   |
|               | medium-sized mammals           | 77.08 $\pm$ 1.62 | 76.67 $\pm$ 0.36 | 75.88 $\pm$ 1.05 | 77.90 $\pm$ 1.35 | 78.31 $\pm$ 0.80  | 78.59 $\pm$ 0.96 | 90.52 $\pm$ 0.34                   |
|               | non-insert invertebrates       | 77.49 $\pm$ 0.56 | 80.55 $\pm$ 0.26 | 76.73 $\pm$ 0.27 | 79.21 $\pm$ 0.79 | 72.68 $\pm$ 0.97  | 74.44 $\pm$ 0.86 | 79.89 $\pm$ 0.91                   |
|               | people                         | 73.07 $\pm$ 0.92 | 67.02 $\pm$ 0.78 | 72.17 $\pm$ 0.83 | 69.28 $\pm$ 1.50 | 78.92 $\pm$ 1.18  | 76.00 $\pm$ 1.45 | 95.13 $\pm$ 0.34                   |
|               | reptiles                       | 75.39 $\pm$ 0.61 | 78.13 $\pm$ 0.38 | 74.99 $\pm$ 0.61 | 78.33 $\pm$ 1.13 | 74.05 $\pm$ 2.06  | 77.22 $\pm$ 0.77 | 84.36 $\pm$ 0.81                   |
|               | small mammals                  | 78.78 $\pm$ 1.16 | 81.01 $\pm$ 0.28 | 78.69 $\pm$ 0.67 | 81.76 $\pm$ 0.75 | 76.20 $\pm$ 1.28  | 78.12 $\pm$ 0.58 | 87.37 $\pm$ 0.35                   |
|               | trees                          | 77.27 $\pm$ 1.90 | 79.19 $\pm$ 0.68 | 75.27 $\pm$ 0.83 | 79.74 $\pm$ 1.20 | 78.99 $\pm$ 1.55  | 82.92 $\pm$ 0.60 | 96.46 $\pm$ 0.21                   |
|               | vehicles 1                     | 65.03 $\pm$ 0.47 | 66.23 $\pm$ 0.45 | 65.86 $\pm$ 0.58 | 67.15 $\pm$ 1.05 | 78.55 $\pm$ 1.52  | 76.27 $\pm$ 1.68 | 95.09 $\pm$ 0.32                   |
|               | vehicles 2                     | 73.95 $\pm$ 1.58 | 72.03 $\pm$ 0.40 | 75.19 $\pm$ 0.62 | 72.74 $\pm$ 1.12 | 75.33 $\pm$ 1.39  | 74.97 $\pm$ 1.48 | 92.95 $\pm$ 0.43                   |
|               | <i>average</i>                 | 77.29 $\pm$ 0.28 | 76.06 $\pm$ 0.16 | 77.05 $\pm$ 0.18 | 76.68 $\pm$ 0.14 | 76.19 $\pm$ 0.62  | 77.18 $\pm$ 0.41 | <b>89.65 <math>\pm</math> 0.09</b> |
| SVHN          | 0                              | 74.76 $\pm$ 0.25 | 78.71 $\pm$ 0.29 | 75.23 $\pm$ 0.64 | 76.17 $\pm$ 0.46 | 75.05 $\pm$ 0.44  | 88.74 $\pm$ 0.61 | 75.19 $\pm$ 0.86                   |
|               | 1                              | 77.71 $\pm$ 0.93 | 80.11 $\pm$ 0.41 | 78.05 $\pm$ 0.65 | 78.10 $\pm$ 0.71 | 74.43 $\pm$ 1.42  | 82.92 $\pm$ 0.94 | 84.80 $\pm$ 0.39                   |
|               | 2                              | 75.15 $\pm$ 0.76 | 76.35 $\pm$ 0.54 | 75.35 $\pm$ 0.46 | 75.70 $\pm$ 0.76 | 74.93 $\pm$ 0.34  | 84.36 $\pm$ 0.88 | 95.67 $\pm$ 0.26                   |
|               | 3                              | 74.64 $\pm$ 0.34 | 75.43 $\pm$ 0.39 | 74.47 $\pm$ 0.55 | 74.93 $\pm$ 0.46 | 74.88 $\pm$ 0.52  | 80.88 $\pm$ 2.03 | 94.14 $\pm$ 0.17                   |
|               | 4                              | 75.86 $\pm$ 0.60 | 77.49 $\pm$ 0.18 | 76.56 $\pm$ 0.47 | 77.09 $\pm$ 0.39 | 75.65 $\pm$ 1.16  | 83.28 $\pm$ 1.13 | 95.93 $\pm$ 0.35                   |
|               | 5                              | 74.19 $\pm$ 0.38 | 76.05 $\pm$ 0.49 | 74.38 $\pm$ 0.45 | 74.75 $\pm$ 0.56 | 75.11 $\pm$ 0.15  | 85.15 $\pm$ 1.69 | 96.27 $\pm$ 0.11                   |
|               | 6                              | 74.32 $\pm$ 0.49 | 75.78 $\pm$ 0.27 | 73.83 $\pm$ 0.60 | 74.73 $\pm$ 0.38 | 74.82 $\pm$ 0.18  | 86.41 $\pm$ 1.45 | 94.45 $\pm$ 0.18                   |
|               | 7                              | 76.76 $\pm$ 0.73 | 78.35 $\pm$ 0.54 | 76.06 $\pm$ 0.65 | 76.91 $\pm$ 0.30 | 74.18 $\pm$ 1.23  | 88.80 $\pm$ 1.13 | 96.31 $\pm$ 0.10                   |
|               | 8                              | 73.82 $\pm$ 0.46 | 76.25 $\pm$ 0.32 | 74.00 $\pm$ 0.61 | 75.12 $\pm$ 0.19 | 75.21 $\pm$ 0.59  | 85.43 $\pm$ 0.95 | 81.58 $\pm$ 0.64                   |
|               | 9                              | 74.68 $\pm$ 1.03 | 76.54 $\pm$ 0.59 | 74.73 $\pm$ 0.26 | 75.40 $\pm$ 0.24 | 75.99 $\pm$ 1.41  | 87.06 $\pm$ 1.35 | 94.73 $\pm$ 0.31                   |
|               | <i>average</i>                 | 75.19 $\pm$ 0.21 | 77.11 $\pm$ 0.14 | 75.27 $\pm$ 0.25 | 75.89 $\pm$ 0.13 | 75.02 $\pm$ 0.32  | 85.30 $\pm$ 0.38 | <b>90.91 <math>\pm</math> 0.13</b> |

Table 11: AUPR-out (%) (outliers as positive class) when  $\rho = 0.05$ 

| Dataset       | Class name                     | CAE              | CAE-IF           | DRAE              | RDAE              | DAGMM             | SSD-IF                             | $E^3$ Outlier                      |
|---------------|--------------------------------|------------------|------------------|-------------------|-------------------|-------------------|------------------------------------|------------------------------------|
| MNIST         | 0                              | 10.76 $\pm$ 1.73 | 43.01 $\pm$ 3.25 | 25.43 $\pm$ 7.71  | 17.60 $\pm$ 1.79  | 36.38 $\pm$ 33.30 | 48.88 $\pm$ 3.25                   | 72.36 $\pm$ 1.86                   |
|               | 1                              | 86.89 $\pm$ 1.67 | 87.45 $\pm$ 1.63 | 47.39 $\pm$ 14.83 | 88.15 $\pm$ 2.07  | 51.42 $\pm$ 19.61 | 70.57 $\pm$ 1.54                   | 69.95 $\pm$ 3.57                   |
|               | 2                              | 9.70 $\pm$ 1.74  | 21.46 $\pm$ 2.66 | 19.68 $\pm$ 3.59  | 11.90 $\pm$ 1.68  | 6.94 $\pm$ 2.01   | 55.14 $\pm$ 1.43                   | 41.99 $\pm$ 1.69                   |
|               | 3                              | 12.49 $\pm$ 1.02 | 26.87 $\pm$ 1.62 | 17.60 $\pm$ 4.74  | 15.37 $\pm$ 1.55  | 6.51 $\pm$ 3.24   | 74.22 $\pm$ 4.28                   | 76.02 $\pm$ 1.27                   |
|               | 4                              | 22.94 $\pm$ 2.88 | 41.33 $\pm$ 6.87 | 29.56 $\pm$ 4.26  | 26.35 $\pm$ 2.06  | 14.48 $\pm$ 5.74  | 72.85 $\pm$ 4.42                   | 63.10 $\pm$ 2.78                   |
|               | 5                              | 10.69 $\pm$ 1.24 | 19.04 $\pm$ 2.36 | 12.38 $\pm$ 4.92  | 13.49 $\pm$ 1.81  | 5.69 $\pm$ 0.41   | 68.48 $\pm$ 3.37                   | 48.06 $\pm$ 2.20                   |
|               | 6                              | 20.27 $\pm$ 6.25 | 38.98 $\pm$ 5.54 | 25.57 $\pm$ 8.45  | 29.17 $\pm$ 4.54  | 8.00 $\pm$ 1.58   | 80.24 $\pm$ 3.70                   | 64.37 $\pm$ 2.49                   |
|               | 7                              | 40.18 $\pm$ 5.45 | 58.37 $\pm$ 2.90 | 32.81 $\pm$ 7.21  | 53.74 $\pm$ 3.79  | 19.84 $\pm$ 5.40  | 72.14 $\pm$ 2.21                   | 56.28 $\pm$ 1.58                   |
|               | 8                              | 7.19 $\pm$ 2.68  | 16.88 $\pm$ 2.41 | 8.38 $\pm$ 1.64   | 6.88 $\pm$ 1.18   | 20.51 $\pm$ 16.23 | 37.19 $\pm$ 5.03                   | 46.40 $\pm$ 1.07                   |
|               | 9                              | 29.14 $\pm$ 4.04 | 38.38 $\pm$ 5.60 | 25.41 $\pm$ 8.79  | 31.39 $\pm$ 3.25  | 10.09 $\pm$ 2.90  | 71.57 $\pm$ 2.57                   | 59.89 $\pm$ 1.49                   |
|               | <i>average</i>                 | 25.03 $\pm$ 1.10 | 39.18 $\pm$ 0.88 | 24.42 $\pm$ 3.41  | 29.40 $\pm$ 1.39  | 17.99 $\pm$ 4.15  | <b>65.13 <math>\pm</math> 0.70</b> | 59.84 $\pm$ 0.70                   |
| Fashion-MNIST | t-shirt                        | 8.91 $\pm$ 1.61  | 23.62 $\pm$ 1.72 | 10.17 $\pm$ 2.31  | 12.23 $\pm$ 0.70  | 18.80 $\pm$ 10.24 | 56.19 $\pm$ 2.63                   | 57.81 $\pm$ 2.01                   |
|               | trouser                        | 56.14 $\pm$ 0.84 | 66.01 $\pm$ 1.81 | 37.60 $\pm$ 4.58  | 60.02 $\pm$ 2.05  | 31.34 $\pm$ 11.95 | 73.33 $\pm$ 1.02                   | 78.53 $\pm$ 2.66                   |
|               | pullover                       | 9.74 $\pm$ 1.98  | 23.28 $\pm$ 2.38 | 9.06 $\pm$ 0.99   | 11.95 $\pm$ 2.30  | 7.82 $\pm$ 2.89   | 67.15 $\pm$ 2.07                   | 72.90 $\pm$ 2.37                   |
|               | dress                          | 16.79 $\pm$ 2.04 | 33.51 $\pm$ 4.96 | 21.44 $\pm$ 3.71  | 18.34 $\pm$ 1.88  | 39.37 $\pm$ 14.85 | 66.05 $\pm$ 2.50                   | 58.35 $\pm$ 2.54                   |
|               | coat                           | 14.09 $\pm$ 1.12 | 31.07 $\pm$ 3.54 | 15.62 $\pm$ 1.45  | 15.92 $\pm$ 2.44  | 12.06 $\pm$ 6.65  | 68.94 $\pm$ 1.95                   | 69.36 $\pm$ 1.91                   |
|               | sandal                         | 25.47 $\pm$ 4.40 | 11.65 $\pm$ 2.39 | 19.62 $\pm$ 4.53  | 26.48 $\pm$ 12.77 | 52.18 $\pm$ 12.56 | 63.91 $\pm$ 2.77                   | 78.07 $\pm$ 0.80                   |
|               | shirt                          | 5.82 $\pm$ 0.88  | 16.05 $\pm$ 1.64 | 5.75 $\pm$ 0.42   | 8.46 $\pm$ 1.06   | 7.76 $\pm$ 1.60   | 54.80 $\pm$ 3.98                   | 53.97 $\pm$ 2.29                   |
|               | sneaker                        | 61.69 $\pm$ 6.47 | 63.16 $\pm$ 7.42 | 64.41 $\pm$ 7.38  | 65.74 $\pm$ 2.02  | 49.66 $\pm$ 19.16 | 86.18 $\pm$ 2.84                   | 94.55 $\pm$ 0.96                   |
|               | bag                            | 5.38 $\pm$ 0.48  | 12.56 $\pm$ 0.89 | 4.83 $\pm$ 0.30   | 6.46 $\pm$ 0.86   | 5.13 $\pm$ 1.52   | 36.88 $\pm$ 1.46                   | 45.49 $\pm$ 2.30                   |
|               | ankle-boot                     | 34.43 $\pm$ 2.90 | 50.47 $\pm$ 4.63 | 30.86 $\pm$ 3.86  | 37.24 $\pm$ 5.05  | 28.61 $\pm$ 11.32 | 91.50 $\pm$ 1.11                   | 94.94 $\pm$ 0.54                   |
|               | <i>average</i>                 | 23.85 $\pm$ 1.07 | 33.14 $\pm$ 1.12 | 21.94 $\pm$ 1.08  | 26.28 $\pm$ 1.64  | 25.27 $\pm$ 4.75  | 66.49 $\pm$ 0.63                   | <b>70.40 <math>\pm</math> 0.30</b> |
| CIFAR10       | airplane                       | 9.68 $\pm$ 0.81  | 7.76 $\pm$ 0.36  | 10.55 $\pm$ 0.18  | 8.17 $\pm$ 1.21   | 6.42 $\pm$ 2.94   | 6.54 $\pm$ 0.83                    | 17.85 $\pm$ 1.62                   |
|               | automobile                     | 4.01 $\pm$ 0.17  | 3.49 $\pm$ 0.11  | 3.90 $\pm$ 0.21   | 3.50 $\pm$ 0.14   | 9.07 $\pm$ 2.34   | 18.67 $\pm$ 3.87                   | 67.11 $\pm$ 2.00                   |
|               | bird                           | 8.75 $\pm$ 0.52  | 9.59 $\pm$ 0.67  | 9.34 $\pm$ 0.64   | 9.56 $\pm$ 0.77   | 5.20 $\pm$ 0.34   | 6.45 $\pm$ 0.45                    | 11.17 $\pm$ 0.89                   |
|               | cat                            | 7.35 $\pm$ 0.71  | 6.01 $\pm$ 0.46  | 7.42 $\pm$ 0.51   | 7.14 $\pm$ 0.71   | 6.54 $\pm$ 2.06   | 6.92 $\pm$ 0.67                    | 11.94 $\pm$ 0.41                   |
|               | deer                           | 9.14 $\pm$ 1.16  | 12.47 $\pm$ 1.85 | 11.18 $\pm$ 1.88  | 12.29 $\pm$ 1.87  | 7.22 $\pm$ 2.38   | 8.76 $\pm$ 0.59                    | 25.35 $\pm$ 1.97                   |
|               | dog                            | 7.27 $\pm$ 0.89  | 5.63 $\pm$ 0.22  | 8.23 $\pm$ 0.55   | 7.03 $\pm$ 0.60   | 6.19 $\pm$ 1.04   | 9.14 $\pm$ 2.24                    | 33.23 $\pm$ 4.49                   |
|               | frog                           | 5.27 $\pm$ 0.50  | 9.01 $\pm$ 0.30  | 5.70 $\pm$ 0.45   | 7.32 $\pm$ 1.20   | 13.36 $\pm$ 4.21  | 11.49 $\pm$ 2.50                   | 26.59 $\pm$ 1.12                   |
|               | horse                          | 6.08 $\pm$ 0.72  | 5.04 $\pm$ 0.10  | 6.15 $\pm$ 0.37   | 5.78 $\pm$ 0.53   | 8.47 $\pm$ 1.53   | 19.02 $\pm$ 4.19                   | 49.53 $\pm$ 3.02                   |
|               | ship                           | 14.87 $\pm$ 1.61 | 10.65 $\pm$ 0.97 | 14.14 $\pm$ 0.46  | 12.89 $\pm$ 0.85  | 8.76 $\pm$ 6.07   | 13.86 $\pm$ 2.26                   | 51.70 $\pm$ 1.26                   |
|               | truck                          | 3.87 $\pm$ 0.20  | 3.50 $\pm$ 0.20  | 3.92 $\pm$ 0.21   | 3.61 $\pm$ 0.22   | 15.39 $\pm$ 4.39  | 18.78 $\pm$ 2.57                   | 51.18 $\pm$ 2.17                   |
|               | <i>average</i>                 | 7.63 $\pm$ 0.31  | 7.32 $\pm$ 0.22  | 8.05 $\pm$ 0.28   | 7.73 $\pm$ 0.35   | 8.66 $\pm$ 0.82   | 11.96 $\pm$ 0.62                   | <b>34.56 <math>\pm</math> 1.06</b> |
| CIFAR100      | aquatic mammals                | 11.61 $\pm$ 1.92 | 9.44 $\pm$ 1.07  | 12.89 $\pm$ 1.45  | 12.49 $\pm$ 1.76  | 6.40 $\pm$ 1.92   | 6.47 $\pm$ 1.44                    | 17.48 $\pm$ 1.69                   |
|               | fish                           | 9.79 $\pm$ 1.09  | 8.04 $\pm$ 1.05  | 9.25 $\pm$ 0.75   | 8.96 $\pm$ 0.58   | 5.24 $\pm$ 0.81   | 7.92 $\pm$ 0.96                    | 11.19 $\pm$ 1.38                   |
|               | flowers                        | 3.77 $\pm$ 0.21  | 3.78 $\pm$ 0.28  | 3.98 $\pm$ 0.14   | 4.17 $\pm$ 0.56   | 12.41 $\pm$ 5.66  | 6.11 $\pm$ 0.50                    | 18.46 $\pm$ 2.82                   |
|               | food containers                | 6.70 $\pm$ 0.83  | 7.01 $\pm$ 1.19  | 6.88 $\pm$ 0.49   | 6.45 $\pm$ 0.38   | 5.00 $\pm$ 0.86   | 5.08 $\pm$ 0.42                    | 17.81 $\pm$ 0.71                   |
|               | fruit and vegetables           | 5.96 $\pm$ 0.82  | 4.49 $\pm$ 0.18  | 5.73 $\pm$ 0.67   | 5.21 $\pm$ 0.85   | 10.95 $\pm$ 2.78  | 5.83 $\pm$ 0.42                    | 16.65 $\pm$ 0.54                   |
|               | household electrical devices   | 5.18 $\pm$ 0.22  | 4.26 $\pm$ 0.20  | 6.03 $\pm$ 0.45   | 5.01 $\pm$ 0.37   | 5.81 $\pm$ 0.34   | 4.83 $\pm$ 0.65                    | 7.44 $\pm$ 0.90                    |
|               | household furniture            | 7.52 $\pm$ 1.37  | 5.71 $\pm$ 0.68  | 8.35 $\pm$ 0.72   | 6.66 $\pm$ 1.02   | 6.86 $\pm$ 2.24   | 5.13 $\pm$ 0.43                    | 16.27 $\pm$ 1.55                   |
|               | inserts                        | 4.44 $\pm$ 0.20  | 5.37 $\pm$ 0.44  | 4.91 $\pm$ 0.39   | 5.14 $\pm$ 0.48   | 6.67 $\pm$ 1.04   | 5.76 $\pm$ 0.40                    | 14.55 $\pm$ 1.16                   |
|               | large carnivores               | 6.14 $\pm$ 1.00  | 7.79 $\pm$ 0.75  | 7.77 $\pm$ 0.59   | 8.75 $\pm$ 1.37   | 11.40 $\pm$ 1.87  | 9.53 $\pm$ 2.48                    | 36.17 $\pm$ 4.71                   |
|               | large man-made outdoor things  | 13.40 $\pm$ 3.65 | 9.89 $\pm$ 1.62  | 15.88 $\pm$ 2.89  | 13.44 $\pm$ 2.68  | 10.14 $\pm$ 1.96  | 9.63 $\pm$ 0.82                    | 36.57 $\pm$ 4.35                   |
|               | large natural outdoor scenes   | 22.22 $\pm$ 3.94 | 23.95 $\pm$ 4.78 | 23.62 $\pm$ 3.46  | 24.15 $\pm$ 5.41  | 7.12 $\pm$ 1.54   | 8.00 $\pm$ 0.96                    | 23.87 $\pm$ 1.29                   |
|               | large omnivores and herbivores | 8.32 $\pm$ 0.98  | 5.89 $\pm$ 0.73  | 8.93 $\pm$ 0.53   | 8.31 $\pm$ 1.05   | 9.24 $\pm$ 2.10   | 6.21 $\pm$ 0.43                    | 25.93 $\pm$ 2.02                   |
|               | medium-sized mammals           | 10.40 $\pm$ 1.33 | 7.11 $\pm$ 0.34  | 10.94 $\pm$ 1.50  | 11.18 $\pm$ 1.23  | 11.47 $\pm$ 2.64  | 8.17 $\pm$ 1.95                    | 34.30 $\pm$ 3.51                   |
|               | non-insert invertebrates       | 5.40 $\pm$ 0.50  | 5.89 $\pm$ 0.32  | 5.26 $\pm$ 0.27   | 5.61 $\pm$ 0.25   | 6.50 $\pm$ 0.95   | 5.02 $\pm$ 0.29                    | 7.22 $\pm$ 0.29                    |
|               | people                         | 5.09 $\pm$ 0.40  | 4.02 $\pm$ 0.28  | 5.33 $\pm$ 0.71   | 4.86 $\pm$ 0.82   | 8.02 $\pm$ 1.08   | 6.99 $\pm$ 0.60                    | 31.45 $\pm$ 3.31                   |
|               | reptiles                       | 7.45 $\pm$ 0.96  | 7.19 $\pm$ 1.13  | 7.79 $\pm$ 1.23   | 7.92 $\pm$ 1.05   | 6.08 $\pm$ 0.71   | 5.70 $\pm$ 0.49                    | 13.22 $\pm$ 2.61                   |
|               | small mammals                  | 8.79 $\pm$ 0.75  | 9.34 $\pm$ 0.71  | 10.76 $\pm$ 0.86  | 11.41 $\pm$ 1.56  | 8.92 $\pm$ 1.05   | 6.72 $\pm$ 0.72                    | 18.53 $\pm$ 1.34                   |
|               | trees                          | 11.81 $\pm$ 1.74 | 10.67 $\pm$ 2.04 | 13.37 $\pm$ 2.14  | 12.08 $\pm$ 1.68  | 11.04 $\pm$ 1.20  | 14.71 $\pm$ 2.55                   | 40.48 $\pm$ 2.96                   |
|               | vehicles 1                     | 3.72 $\pm$ 0.24  | 3.73 $\pm$ 0.15  | 3.94 $\pm$ 0.50   | 3.87 $\pm$ 0.36   | 8.15 $\pm$ 1.67   | 9.28 $\pm$ 0.89                    | 45.14 $\pm$ 2.73                   |
|               | vehicles 2                     | 6.23 $\pm$ 0.85  | 5.15 $\pm$ 0.27  | 7.81 $\pm$ 0.82   | 6.36 $\pm$ 0.75   | 5.70 $\pm$ 0.90   | 6.23 $\pm$ 1.11                    | 20.94 $\pm$ 1.86                   |
|               | <i>average</i>                 | 8.20 $\pm$ 0.33  | 7.44 $\pm$ 0.25  | 8.97 $\pm$ 0.27   | 8.60 $\pm$ 0.17   | 8.16 $\pm$ 0.30   | 7.17 $\pm$ 0.29                    | <b>22.68 <math>\pm</math> 0.42</b> |
| SVHN          | 0                              | 5.22 $\pm$ 0.17  | 6.81 $\pm$ 0.38  | 5.68 $\pm$ 0.19   | 5.27 $\pm$ 0.28   | 9.04 $\pm$ 4.88   | 17.06 $\pm$ 1.93                   | 21.77 $\pm$ 1.63                   |
|               | 1                              | 6.03 $\pm$ 0.47  | 7.56 $\pm$ 0.30  | 6.08 $\pm$ 0.38   | 6.75 $\pm$ 0.30   | 10.22 $\pm$ 7.12  | 10.93 $\pm$ 1.99                   | 16.22 $\pm$ 1.21                   |
|               | 2                              | 5.28 $\pm$ 0.08  | 5.82 $\pm$ 0.24  | 5.09 $\pm$ 0.20   | 5.37 $\pm$ 0.13   | 15.45 $\pm$ 8.89  | 13.82 $\pm$ 1.34                   | 28.57 $\pm$ 1.18                   |
|               | 3                              | 5.04 $\pm$ 0.13  | 5.50 $\pm$ 0.16  | 4.94 $\pm$ 0.07   | 5.06 $\pm$ 0.12   | 17.29 $\pm$ 4.22  | 10.31 $\pm$ 1.15                   | 21.63 $\pm$ 0.70                   |
|               | 4                              | 5.55 $\pm$ 0.43  | 6.67 $\pm$ 0.47  | 5.47 $\pm$ 0.24   | 5.56 $\pm$ 0.17   | 18.69 $\pm$ 11.30 | 13.32 $\pm$ 1.53                   | 32.12 $\pm$ 0.91                   |
|               | 5                              | 4.88 $\pm$ 0.16  | 5.37 $\pm$ 0.16  | 4.76 $\pm$ 0.14   | 4.99 $\pm$ 0.17   | 22.71 $\pm$ 9.10  | 11.81 $\pm$ 1.51                   | 32.91 $\pm$ 0.94                   |
|               | 6                              | 4.84 $\pm$ 0.16  | 5.23 $\pm$ 0.13  | 4.65 $\pm$ 0.12   | 4.91 $\pm$ 0.17   | 19.19 $\pm$ 13.63 | 15.25 $\pm$ 2.48                   | 31.25 $\pm$ 1.05                   |
|               | 7                              | 6.16 $\pm$ 0.40  | 6.71 $\pm$ 0.52  | 5.73 $\pm$ 0.49   | 6.11 $\pm$ 0.31   | 20.68 $\pm$ 8.63  | 20.73 $\pm$ 1.42                   | 40.84 $\pm$ 1.06                   |
|               | 8                              | 5.03 $\pm$ 0.23  | 5.57 $\pm$ 0.15  | 4.82 $\pm$ 0.19   | 5.11 $\pm$ 0.28   | 11.09 $\pm$ 7.50  | 9.78 $\pm$ 1.26                    | 16.27 $\pm$ 0.70                   |
|               | 9                              | 5.13 $\pm$ 0.26  | 5.51 $\pm$ 0.26  | 4.93 $\pm$ 0.09   | 5.32 $\pm$ 0.29   | 13.65 $\pm$ 9.61  | 15.47 $\pm$ 1.05                   | 29.86 $\pm$ 2.56                   |
|               | <i>average</i>                 | 5.32 $\pm$ 0.09  | 6.08 $\pm$ 0.10  | 5.21 $\pm$ 0.09   | 5.44 $\pm$ 0.04   | 15.80 $\pm$ 2.21  | 13.85 $\pm$ 0.49                   | <b>27.15 <math>\pm</math> 0.46</b> |

Table 12: AUPR-out (%) (outliers as positive class) when  $\rho = 0.1$ 

| Dataset       | Class name                     | CAE              | CAE-IF           | DRAE              | RDAE             | DAGMM             | SSD-IF                             | $E^3$ Outlier                      |
|---------------|--------------------------------|------------------|------------------|-------------------|------------------|-------------------|------------------------------------|------------------------------------|
| MNIST         | 0                              | 19.41 $\pm$ 3.89 | 53.24 $\pm$ 7.39 | 28.59 $\pm$ 13.07 | 21.21 $\pm$ 3.30 | 49.61 $\pm$ 34.50 | 55.13 $\pm$ 3.27                   | 73.08 $\pm$ 1.15                   |
|               | 1                              | 91.68 $\pm$ 0.99 | 92.27 $\pm$ 1.34 | 42.86 $\pm$ 13.71 | 92.09 $\pm$ 0.81 | 65.54 $\pm$ 24.42 | 76.55 $\pm$ 1.75                   | 73.05 $\pm$ 0.90                   |
|               | 2                              | 13.74 $\pm$ 2.12 | 28.26 $\pm$ 1.66 | 20.44 $\pm$ 0.95  | 18.87 $\pm$ 1.54 | 12.00 $\pm$ 3.67  | 59.02 $\pm$ 4.19                   | 54.66 $\pm$ 1.08                   |
|               | 3                              | 19.63 $\pm$ 4.50 | 36.55 $\pm$ 4.67 | 27.17 $\pm$ 5.80  | 22.66 $\pm$ 2.53 | 11.74 $\pm$ 2.95  | 72.30 $\pm$ 2.88                   | 81.49 $\pm$ 1.94                   |
|               | 4                              | 32.07 $\pm$ 6.00 | 49.19 $\pm$ 4.80 | 31.97 $\pm$ 5.96  | 40.08 $\pm$ 2.19 | 19.45 $\pm$ 6.46  | 77.80 $\pm$ 3.21                   | 71.34 $\pm$ 1.83                   |
|               | 5                              | 18.85 $\pm$ 1.30 | 30.42 $\pm$ 1.57 | 25.31 $\pm$ 4.19  | 22.26 $\pm$ 3.29 | 11.33 $\pm$ 0.65  | 67.89 $\pm$ 4.01                   | 56.59 $\pm$ 2.00                   |
|               | 6                              | 31.20 $\pm$ 6.41 | 54.11 $\pm$ 1.96 | 37.10 $\pm$ 8.89  | 33.66 $\pm$ 4.55 | 25.78 $\pm$ 16.43 | 80.49 $\pm$ 1.03                   | 72.47 $\pm$ 0.96                   |
|               | 7                              | 52.41 $\pm$ 3.83 | 66.39 $\pm$ 3.74 | 46.73 $\pm$ 4.54  | 55.90 $\pm$ 3.15 | 36.51 $\pm$ 20.35 | 73.55 $\pm$ 1.16                   | 64.63 $\pm$ 0.91                   |
|               | 8                              | 12.40 $\pm$ 1.16 | 27.29 $\pm$ 2.61 | 13.70 $\pm$ 2.71  | 13.39 $\pm$ 1.02 | 15.77 $\pm$ 5.52  | 47.96 $\pm$ 3.61                   | 57.04 $\pm$ 1.45                   |
|               | 9                              | 37.95 $\pm$ 3.36 | 52.03 $\pm$ 3.51 | 31.43 $\pm$ 13.47 | 38.01 $\pm$ 4.42 | 18.45 $\pm$ 4.23  | 76.41 $\pm$ 2.50                   | 70.61 $\pm$ 1.70                   |
|               | <i>average</i>                 | 32.93 $\pm$ 0.74 | 48.98 $\pm$ 1.06 | 30.53 $\pm$ 1.99  | 35.81 $\pm$ 0.77 | 26.62 $\pm$ 5.31  | <b>68.71 <math>\pm</math> 1.17</b> | 67.50 $\pm$ 0.31                   |
| Fashion-MNIST | t-shirt                        | 13.50 $\pm$ 2.24 | 34.19 $\pm$ 2.51 | 14.76 $\pm$ 2.93  | 18.19 $\pm$ 2.04 | 21.51 $\pm$ 8.91  | 59.56 $\pm$ 2.03                   | 66.31 $\pm$ 1.95                   |
|               | trouser                        | 65.54 $\pm$ 1.46 | 74.34 $\pm$ 2.37 | 33.44 $\pm$ 12.93 | 71.64 $\pm$ 2.00 | 34.73 $\pm$ 13.15 | 78.47 $\pm$ 3.16                   | 83.42 $\pm$ 1.26                   |
|               | pullover                       | 15.04 $\pm$ 1.01 | 34.81 $\pm$ 2.46 | 14.63 $\pm$ 1.28  | 18.97 $\pm$ 3.00 | 12.63 $\pm$ 4.92  | 69.48 $\pm$ 2.74                   | 79.16 $\pm$ 1.59                   |
|               | dress                          | 23.77 $\pm$ 1.97 | 41.97 $\pm$ 2.10 | 27.16 $\pm$ 4.02  | 26.82 $\pm$ 3.73 | 47.57 $\pm$ 15.22 | 67.29 $\pm$ 2.49                   | 64.01 $\pm$ 1.65                   |
|               | coat                           | 20.54 $\pm$ 1.22 | 41.62 $\pm$ 2.48 | 19.14 $\pm$ 2.23  | 26.76 $\pm$ 1.83 | 18.24 $\pm$ 10.26 | 71.59 $\pm$ 0.57                   | 77.48 $\pm$ 0.94                   |
|               | sandal                         | 29.43 $\pm$ 3.37 | 18.10 $\pm$ 1.63 | 25.57 $\pm$ 3.82  | 24.53 $\pm$ 2.06 | 55.01 $\pm$ 18.88 | 65.13 $\pm$ 3.10                   | 79.98 $\pm$ 1.16                   |
|               | shirt                          | 10.47 $\pm$ 1.11 | 24.61 $\pm$ 0.76 | 10.59 $\pm$ 0.82  | 14.53 $\pm$ 1.03 | 15.93 $\pm$ 2.81  | 56.96 $\pm$ 2.12                   | 60.57 $\pm$ 1.73                   |
|               | sneaker                        | 65.39 $\pm$ 3.41 | 63.96 $\pm$ 2.97 | 69.15 $\pm$ 3.79  | 61.69 $\pm$ 2.45 | 56.93 $\pm$ 22.49 | 88.30 $\pm$ 2.21                   | 95.79 $\pm$ 0.24                   |
|               | bag                            | 9.25 $\pm$ 0.75  | 20.11 $\pm$ 1.05 | 9.15 $\pm$ 0.39   | 10.32 $\pm$ 0.67 | 11.46 $\pm$ 2.05  | 36.25 $\pm$ 2.75                   | 55.71 $\pm$ 1.08                   |
|               | ankle-boot                     | 39.58 $\pm$ 3.68 | 49.69 $\pm$ 3.57 | 31.19 $\pm$ 3.52  | 43.79 $\pm$ 5.38 | 28.86 $\pm$ 20.98 | 92.70 $\pm$ 1.11                   | 96.73 $\pm$ 0.24                   |
|               | <i>average</i>                 | 29.25 $\pm$ 0.13 | 40.34 $\pm$ 0.39 | 25.48 $\pm$ 1.11  | 31.72 $\pm$ 1.39 | 30.29 $\pm$ 6.31  | 68.57 $\pm$ 0.39                   | <b>75.91 <math>\pm</math> 0.24</b> |
| CIFAR10       | airplane                       | 18.24 $\pm$ 2.40 | 14.68 $\pm$ 0.33 | 19.65 $\pm$ 0.29  | 14.59 $\pm$ 1.01 | 10.88 $\pm$ 3.32  | 10.43 $\pm$ 0.78                   | 28.53 $\pm$ 2.68                   |
|               | automobile                     | 7.57 $\pm$ 0.51  | 7.29 $\pm$ 0.31  | 7.75 $\pm$ 0.19   | 7.13 $\pm$ 0.29  | 19.50 $\pm$ 5.92  | 24.26 $\pm$ 4.72                   | 71.61 $\pm$ 1.21                   |
|               | bird                           | 15.24 $\pm$ 1.94 | 17.00 $\pm$ 0.55 | 17.09 $\pm$ 0.67  | 16.38 $\pm$ 1.28 | 10.17 $\pm$ 0.98  | 11.17 $\pm$ 0.98                   | 18.18 $\pm$ 0.62                   |
|               | cat                            | 14.14 $\pm$ 1.28 | 10.99 $\pm$ 0.52 | 14.37 $\pm$ 0.49  | 12.47 $\pm$ 1.22 | 11.18 $\pm$ 0.80  | 12.22 $\pm$ 0.95                   | 19.05 $\pm$ 0.91                   |
|               | deer                           | 19.46 $\pm$ 1.06 | 22.81 $\pm$ 0.88 | 19.59 $\pm$ 0.92  | 22.29 $\pm$ 1.91 | 15.10 $\pm$ 2.59  | 17.21 $\pm$ 1.31                   | 37.24 $\pm$ 1.26                   |
|               | dog                            | 14.39 $\pm$ 1.88 | 11.03 $\pm$ 0.53 | 15.53 $\pm$ 0.83  | 13.65 $\pm$ 1.25 | 12.14 $\pm$ 1.79  | 15.99 $\pm$ 1.48                   | 41.31 $\pm$ 1.67                   |
|               | frog                           | 11.66 $\pm$ 1.52 | 16.82 $\pm$ 0.75 | 9.31 $\pm$ 0.34   | 13.18 $\pm$ 0.87 | 18.08 $\pm$ 3.60  | 18.84 $\pm$ 4.38                   | 36.72 $\pm$ 3.04                   |
|               | horse                          | 10.95 $\pm$ 0.59 | 9.77 $\pm$ 0.45  | 11.62 $\pm$ 0.59  | 11.48 $\pm$ 1.14 | 15.10 $\pm$ 1.68  | 25.94 $\pm$ 0.84                   | 58.09 $\pm$ 3.09                   |
|               | ship                           | 25.07 $\pm$ 2.84 | 18.99 $\pm$ 1.04 | 24.37 $\pm$ 1.23  | 20.77 $\pm$ 1.67 | 20.09 $\pm$ 14.18 | 20.00 $\pm$ 2.47                   | 63.22 $\pm$ 0.81                   |
|               | truck                          | 7.48 $\pm$ 0.38  | 7.23 $\pm$ 0.23  | 7.80 $\pm$ 0.20   | 7.56 $\pm$ 0.25  | 24.21 $\pm$ 7.35  | 27.25 $\pm$ 2.56                   | 60.21 $\pm$ 1.78                   |
|               | <i>average</i>                 | 14.42 $\pm$ 0.68 | 13.66 $\pm$ 0.18 | 14.71 $\pm$ 0.11  | 13.95 $\pm$ 0.30 | 15.64 $\pm$ 1.34  | 18.33 $\pm$ 0.55                   | <b>43.42 <math>\pm</math> 0.47</b> |
| CIFAR100      | aquatic mammals                | 20.76 $\pm$ 2.73 | 15.18 $\pm$ 0.78 | 21.18 $\pm$ 1.98  | 18.96 $\pm$ 2.41 | 10.73 $\pm$ 0.96  | 12.07 $\pm$ 0.93                   | 27.30 $\pm$ 2.17                   |
|               | fish                           | 16.55 $\pm$ 2.39 | 13.28 $\pm$ 0.87 | 16.99 $\pm$ 1.00  | 14.76 $\pm$ 1.28 | 8.69 $\pm$ 0.89   | 13.09 $\pm$ 0.81                   | 20.09 $\pm$ 1.06                   |
|               | flowers                        | 7.68 $\pm$ 1.45  | 8.17 $\pm$ 0.52  | 7.60 $\pm$ 0.35   | 7.75 $\pm$ 0.81  | 19.45 $\pm$ 5.82  | 12.37 $\pm$ 1.34                   | 28.87 $\pm$ 1.09                   |
|               | food containers                | 13.62 $\pm$ 1.87 | 12.17 $\pm$ 0.83 | 13.91 $\pm$ 0.46  | 12.64 $\pm$ 1.02 | 10.34 $\pm$ 0.61  | 9.23 $\pm$ 0.59                    | 27.05 $\pm$ 2.39                   |
|               | fruit and vegetables           | 10.01 $\pm$ 0.99 | 8.73 $\pm$ 0.34  | 10.58 $\pm$ 0.53  | 8.85 $\pm$ 1.27  | 19.02 $\pm$ 5.38  | 11.94 $\pm$ 0.91                   | 24.54 $\pm$ 1.65                   |
|               | household electrical devices   | 10.49 $\pm$ 1.46 | 8.28 $\pm$ 0.11  | 10.35 $\pm$ 1.28  | 8.97 $\pm$ 0.54  | 10.05 $\pm$ 1.03  | 9.52 $\pm$ 0.28                    | 14.03 $\pm$ 1.07                   |
|               | household furniture            | 14.63 $\pm$ 1.16 | 10.88 $\pm$ 0.32 | 14.41 $\pm$ 0.36  | 11.22 $\pm$ 1.10 | 12.48 $\pm$ 3.54  | 9.28 $\pm$ 0.24                    | 26.64 $\pm$ 1.30                   |
|               | inserts                        | 9.67 $\pm$ 0.32  | 11.35 $\pm$ 0.45 | 10.02 $\pm$ 0.43  | 10.36 $\pm$ 1.19 | 9.86 $\pm$ 0.52   | 11.41 $\pm$ 0.35                   | 22.39 $\pm$ 1.05                   |
|               | large carnivores               | 12.77 $\pm$ 1.30 | 14.53 $\pm$ 1.45 | 12.56 $\pm$ 0.88  | 17.12 $\pm$ 1.83 | 18.30 $\pm$ 1.66  | 18.40 $\pm$ 3.88                   | 47.93 $\pm$ 3.86                   |
|               | large man-made outdoor things  | 20.79 $\pm$ 3.02 | 18.40 $\pm$ 0.91 | 21.11 $\pm$ 1.51  | 24.87 $\pm$ 2.28 | 21.88 $\pm$ 3.73  | 15.88 $\pm$ 1.92                   | 49.89 $\pm$ 1.91                   |
|               | large natural outdoor scenes   | 33.77 $\pm$ 6.48 | 38.32 $\pm$ 4.21 | 37.91 $\pm$ 2.92  | 33.81 $\pm$ 6.97 | 15.16 $\pm$ 3.15  | 14.51 $\pm$ 1.19                   | 35.79 $\pm$ 1.96                   |
|               | large omnivores and herbivores | 15.53 $\pm$ 0.55 | 11.97 $\pm$ 0.80 | 16.29 $\pm$ 0.94  | 16.77 $\pm$ 1.79 | 17.23 $\pm$ 1.19  | 13.42 $\pm$ 1.93                   | 38.28 $\pm$ 1.06                   |
|               | medium-sized mammals           | 17.22 $\pm$ 1.21 | 12.91 $\pm$ 0.52 | 15.74 $\pm$ 0.63  | 18.47 $\pm$ 1.85 | 20.08 $\pm$ 1.43  | 15.60 $\pm$ 2.21                   | 43.57 $\pm$ 2.63                   |
|               | non-insert invertebrates       | 10.21 $\pm$ 0.50 | 11.86 $\pm$ 0.21 | 10.22 $\pm$ 0.28  | 10.11 $\pm$ 0.37 | 9.54 $\pm$ 0.39   | 10.43 $\pm$ 0.40                   | 13.60 $\pm$ 0.77                   |
|               | people                         | 10.12 $\pm$ 0.78 | 7.98 $\pm$ 0.16  | 10.04 $\pm$ 0.50  | 10.03 $\pm$ 0.93 | 13.03 $\pm$ 1.22  | 11.92 $\pm$ 1.15                   | 44.16 $\pm$ 2.99                   |
|               | reptiles                       | 13.79 $\pm$ 1.10 | 13.13 $\pm$ 0.65 | 13.83 $\pm$ 0.50  | 13.77 $\pm$ 0.99 | 10.22 $\pm$ 0.33  | 11.22 $\pm$ 0.81                   | 22.71 $\pm$ 1.84                   |
|               | small mammals                  | 16.92 $\pm$ 2.01 | 19.30 $\pm$ 1.29 | 18.13 $\pm$ 1.39  | 20.81 $\pm$ 1.30 | 14.90 $\pm$ 0.86  | 13.48 $\pm$ 0.73                   | 29.54 $\pm$ 2.53                   |
|               | trees                          | 17.14 $\pm$ 3.19 | 21.37 $\pm$ 0.92 | 19.58 $\pm$ 1.80  | 21.38 $\pm$ 2.93 | 18.12 $\pm$ 3.25  | 20.31 $\pm$ 3.83                   | 56.26 $\pm$ 2.17                   |
|               | vehicles 1                     | 7.84 $\pm$ 0.52  | 8.09 $\pm$ 0.21  | 7.36 $\pm$ 0.44   | 7.91 $\pm$ 0.37  | 13.82 $\pm$ 1.10  | 13.95 $\pm$ 1.36                   | 56.68 $\pm$ 1.98                   |
|               | vehicles 2                     | 10.72 $\pm$ 1.30 | 10.77 $\pm$ 1.00 | 11.33 $\pm$ 0.94  | 11.63 $\pm$ 1.30 | 10.90 $\pm$ 0.84  | 11.50 $\pm$ 0.39                   | 36.67 $\pm$ 2.35                   |
|               | <i>average</i>                 | 14.51 $\pm$ 0.57 | 13.83 $\pm$ 0.21 | 14.96 $\pm$ 0.11  | 15.01 $\pm$ 0.43 | 14.19 $\pm$ 0.45  | 12.98 $\pm$ 0.17                   | <b>33.30 <math>\pm</math> 0.39</b> |
| SVHN          | 0                              | 10.34 $\pm$ 0.37 | 13.17 $\pm$ 0.62 | 10.65 $\pm$ 0.29  | 10.59 $\pm$ 0.58 | 15.27 $\pm$ 6.31  | 30.87 $\pm$ 3.14                   | 25.89 $\pm$ 1.45                   |
|               | 1                              | 12.79 $\pm$ 0.78 | 14.57 $\pm$ 0.96 | 12.38 $\pm$ 0.55  | 13.11 $\pm$ 0.81 | 21.94 $\pm$ 7.09  | 17.59 $\pm$ 0.83                   | 22.15 $\pm$ 1.09                   |
|               | 2                              | 10.75 $\pm$ 0.16 | 11.73 $\pm$ 0.20 | 10.67 $\pm$ 0.27  | 10.93 $\pm$ 0.25 | 17.36 $\pm$ 8.07  | 20.92 $\pm$ 1.69                   | 40.71 $\pm$ 1.28                   |
|               | 3                              | 10.05 $\pm$ 0.15 | 10.67 $\pm$ 0.25 | 9.91 $\pm$ 0.20   | 10.15 $\pm$ 0.19 | 15.81 $\pm$ 5.72  | 17.18 $\pm$ 1.44                   | 32.45 $\pm$ 0.24                   |
|               | 4                              | 11.01 $\pm$ 0.44 | 12.43 $\pm$ 0.75 | 10.85 $\pm$ 0.30  | 11.72 $\pm$ 0.29 | 21.97 $\pm$ 5.98  | 18.62 $\pm$ 2.11                   | 44.26 $\pm$ 1.43                   |
|               | 5                              | 9.71 $\pm$ 0.24  | 10.61 $\pm$ 0.40 | 9.58 $\pm$ 0.31   | 9.84 $\pm$ 0.32  | 25.10 $\pm$ 10.95 | 21.07 $\pm$ 2.55                   | 44.00 $\pm$ 1.80                   |
|               | 6                              | 9.83 $\pm$ 0.26  | 10.34 $\pm$ 0.37 | 9.44 $\pm$ 0.22   | 9.89 $\pm$ 0.18  | 16.63 $\pm$ 6.96  | 22.18 $\pm$ 1.82                   | 41.63 $\pm$ 1.23                   |
|               | 7                              | 10.87 $\pm$ 0.53 | 12.72 $\pm$ 0.35 | 11.35 $\pm$ 0.51  | 10.98 $\pm$ 0.68 | 25.77 $\pm$ 14.33 | 28.50 $\pm$ 4.72                   | 50.71 $\pm$ 1.37                   |
|               | 8                              | 9.95 $\pm$ 0.27  | 11.14 $\pm$ 0.32 | 9.58 $\pm$ 0.22   | 9.98 $\pm$ 0.31  | 14.60 $\pm$ 8.64  | 19.40 $\pm$ 1.99                   | 25.04 $\pm$ 2.20                   |
|               | 9                              | 10.29 $\pm$ 0.32 | 11.30 $\pm$ 0.43 | 10.16 $\pm$ 0.12  | 10.71 $\pm$ 0.42 | 18.70 $\pm$ 8.92  | 24.09 $\pm$ 0.69                   | 39.67 $\pm$ 1.65                   |
|               | <i>average</i>                 | 10.56 $\pm$ 0.12 | 11.87 $\pm$ 0.26 | 10.46 $\pm$ 0.18  | 10.79 $\pm$ 0.21 | 19.31 $\pm$ 2.43  | 22.04 $\pm$ 0.79                   | <b>36.65 <math>\pm</math> 0.12</b> |



Table 13: AUPR-out (%) (outliers as positive class) when  $\rho = 0.15$ 

| Dataset       | Class name                     | CAE               | CAE-IF           | DRAE              | RDAE             | DAGMM             | SSD-IF           | $E^3$ Outlier                      |
|---------------|--------------------------------|-------------------|------------------|-------------------|------------------|-------------------|------------------|------------------------------------|
| MNIST         | 0                              | 19.63 $\pm$ 3.45  | 56.80 $\pm$ 3.92 | 34.84 $\pm$ 17.52 | 20.60 $\pm$ 3.94 | 51.66 $\pm$ 31.41 | 60.50 $\pm$ 7.01 | 70.15 $\pm$ 0.88                   |
|               | 1                              | 92.84 $\pm$ 1.76  | 94.57 $\pm$ 0.99 | 63.41 $\pm$ 13.90 | 93.78 $\pm$ 0.76 | 69.22 $\pm$ 28.68 | 80.60 $\pm$ 2.59 | 71.06 $\pm$ 2.21                   |
|               | 2                              | 18.99 $\pm$ 3.21  | 35.31 $\pm$ 1.85 | 23.52 $\pm$ 4.03  | 19.38 $\pm$ 2.74 | 16.18 $\pm$ 3.28  | 60.47 $\pm$ 2.86 | 61.70 $\pm$ 1.16                   |
|               | 3                              | 21.95 $\pm$ 2.07  | 42.16 $\pm$ 3.65 | 32.10 $\pm$ 8.41  | 29.69 $\pm$ 2.20 | 25.17 $\pm$ 12.63 | 73.27 $\pm$ 1.84 | 84.90 $\pm$ 0.55                   |
|               | 4                              | 37.58 $\pm$ 5.59  | 50.08 $\pm$ 2.86 | 37.21 $\pm$ 10.38 | 42.75 $\pm$ 2.34 | 30.80 $\pm$ 14.52 | 78.07 $\pm$ 2.29 | 73.62 $\pm$ 1.76                   |
|               | 5                              | 20.65 $\pm$ 1.71  | 51.51 $\pm$ 1.03 | 24.97 $\pm$ 1.52  | 17.81 $\pm$ 3.57 | 17.18 $\pm$ 1.68  | 65.53 $\pm$ 2.68 | 61.18 $\pm$ 1.44                   |
|               | 6                              | 31.59 $\pm$ 4.34  | 58.36 $\pm$ 5.84 | 25.89 $\pm$ 7.68  | 34.20 $\pm$ 3.28 | 20.58 $\pm$ 6.85  | 78.57 $\pm$ 1.71 | 76.61 $\pm$ 0.74                   |
|               | 7                              | 44.50 $\pm$ 11.65 | 66.81 $\pm$ 1.79 | 48.08 $\pm$ 3.25  | 50.74 $\pm$ 5.18 | 38.57 $\pm$ 20.82 | 74.09 $\pm$ 2.56 | 69.14 $\pm$ 0.42                   |
|               | 8                              | 16.78 $\pm$ 2.35  | 33.83 $\pm$ 2.09 | 22.57 $\pm$ 4.92  | 18.78 $\pm$ 2.52 | 19.87 $\pm$ 5.95  | 50.92 $\pm$ 2.83 | 62.90 $\pm$ 1.71                   |
|               | 9                              | 43.68 $\pm$ 4.63  | 59.83 $\pm$ 1.89 | 37.61 $\pm$ 8.89  | 43.89 $\pm$ 5.99 | 26.06 $\pm$ 6.49  | 79.04 $\pm$ 1.23 | 75.14 $\pm$ 1.42                   |
|               | <i>average</i>                 | 34.82 $\pm$ 1.84  | 54.93 $\pm$ 0.76 | 35.02 $\pm$ 2.52  | 37.16 $\pm$ 2.20 | 31.53 $\pm$ 3.75  | 70.11 $\pm$ 0.96 | <b>70.64 <math>\pm</math> 0.43</b> |
| Fashion-MNIST | t-shirt                        | 21.57 $\pm$ 2.11  | 43.29 $\pm$ 1.61 | 22.81 $\pm$ 1.16  | 25.36 $\pm$ 1.93 | 44.81 $\pm$ 16.03 | 62.02 $\pm$ 3.19 | 72.47 $\pm$ 0.70                   |
|               | trouser                        | 71.85 $\pm$ 2.31  | 79.02 $\pm$ 3.27 | 66.75 $\pm$ 4.11  | 77.47 $\pm$ 2.30 | 50.89 $\pm$ 7.97  | 81.51 $\pm$ 4.08 | 85.37 $\pm$ 1.11                   |
|               | pullover                       | 21.73 $\pm$ 3.37  | 41.76 $\pm$ 0.75 | 20.87 $\pm$ 2.75  | 23.69 $\pm$ 4.47 | 22.81 $\pm$ 5.83  | 72.05 $\pm$ 2.58 | 82.45 $\pm$ 1.21                   |
|               | dress                          | 31.72 $\pm$ 2.77  | 47.87 $\pm$ 3.54 | 31.56 $\pm$ 2.11  | 32.58 $\pm$ 2.90 | 49.00 $\pm$ 8.61  | 69.36 $\pm$ 1.03 | 66.26 $\pm$ 1.68                   |
|               | coat                           | 25.81 $\pm$ 1.80  | 47.50 $\pm$ 3.22 | 25.40 $\pm$ 1.55  | 29.88 $\pm$ 6.34 | 33.56 $\pm$ 19.64 | 74.28 $\pm$ 0.55 | 79.95 $\pm$ 0.42                   |
|               | sandal                         | 33.17 $\pm$ 2.53  | 21.92 $\pm$ 1.94 | 32.66 $\pm$ 1.48  | 31.39 $\pm$ 7.72 | 71.38 $\pm$ 14.66 | 64.65 $\pm$ 3.23 | 80.60 $\pm$ 1.07                   |
|               | shirt                          | 15.18 $\pm$ 0.77  | 31.35 $\pm$ 1.61 | 14.85 $\pm$ 0.53  | 19.22 $\pm$ 2.15 | 27.05 $\pm$ 12.51 | 59.75 $\pm$ 1.75 | 63.88 $\pm$ 1.15                   |
|               | sneaker                        | 64.38 $\pm$ 4.59  | 69.43 $\pm$ 2.55 | 68.28 $\pm$ 4.36  | 66.56 $\pm$ 5.17 | 59.76 $\pm$ 11.51 | 90.42 $\pm$ 1.99 | 95.87 $\pm$ 0.72                   |
|               | bag                            | 13.57 $\pm$ 2.37  | 22.99 $\pm$ 1.47 | 13.42 $\pm$ 0.77  | 14.21 $\pm$ 2.40 | 26.01 $\pm$ 14.59 | 39.34 $\pm$ 2.90 | 57.58 $\pm$ 0.79                   |
|               | ankle-boot                     | 47.24 $\pm$ 4.04  | 50.00 $\pm$ 3.85 | 36.81 $\pm$ 1.84  | 45.48 $\pm$ 2.85 | 43.18 $\pm$ 25.86 | 91.67 $\pm$ 1.84 | 97.21 $\pm$ 0.22                   |
|               | <i>average</i>                 | 34.62 $\pm$ 1.14  | 45.51 $\pm$ 0.91 | 33.34 $\pm$ 1.03  | 36.58 $\pm$ 1.36 | 42.84 $\pm$ 8.88  | 70.51 $\pm$ 0.55 | <b>78.16 <math>\pm</math> 0.24</b> |
| CIFAR10       | airplane                       | 28.96 $\pm$ 2.69  | 21.62 $\pm$ 0.98 | 28.72 $\pm$ 0.96  | 22.54 $\pm$ 2.06 | 16.90 $\pm$ 4.11  | 15.90 $\pm$ 0.91 | 35.47 $\pm$ 1.46                   |
|               | automobile                     | 11.31 $\pm$ 0.39  | 10.99 $\pm$ 0.19 | 11.58 $\pm$ 0.25  | 10.85 $\pm$ 0.43 | 24.02 $\pm$ 5.03  | 31.48 $\pm$ 4.78 | 76.88 $\pm$ 1.60                   |
|               | bird                           | 22.03 $\pm$ 0.73  | 24.27 $\pm$ 0.39 | 24.24 $\pm$ 0.36  | 24.02 $\pm$ 1.08 | 14.16 $\pm$ 2.11  | 16.10 $\pm$ 0.94 | 24.80 $\pm$ 0.52                   |
|               | cat                            | 20.05 $\pm$ 0.76  | 16.93 $\pm$ 0.51 | 20.68 $\pm$ 0.23  | 18.73 $\pm$ 1.17 | 17.47 $\pm$ 1.54  | 17.10 $\pm$ 1.17 | 24.04 $\pm$ 0.83                   |
|               | deer                           | 25.01 $\pm$ 1.51  | 31.54 $\pm$ 0.86 | 27.07 $\pm$ 0.47  | 30.60 $\pm$ 1.35 | 19.00 $\pm$ 2.68  | 23.24 $\pm$ 1.06 | 44.35 $\pm$ 1.01                   |
|               | dog                            | 21.32 $\pm$ 1.08  | 16.54 $\pm$ 0.58 | 22.22 $\pm$ 1.02  | 19.83 $\pm$ 1.46 | 17.14 $\pm$ 1.26  | 24.36 $\pm$ 1.91 | 44.63 $\pm$ 2.11                   |
|               | frog                           | 16.51 $\pm$ 1.55  | 23.36 $\pm$ 0.73 | 14.58 $\pm$ 0.59  | 18.64 $\pm$ 1.32 | 22.42 $\pm$ 3.85  | 25.66 $\pm$ 3.27 | 40.98 $\pm$ 1.98                   |
|               | horse                          | 15.96 $\pm$ 0.78  | 14.56 $\pm$ 0.44 | 16.73 $\pm$ 0.49  | 16.47 $\pm$ 0.59 | 21.53 $\pm$ 3.31  | 30.66 $\pm$ 3.61 | 60.66 $\pm$ 1.13                   |
|               | ship                           | 32.49 $\pm$ 2.49  | 26.70 $\pm$ 1.26 | 33.55 $\pm$ 0.96  | 28.66 $\pm$ 4.67 | 25.81 $\pm$ 15.68 | 27.90 $\pm$ 4.04 | 68.33 $\pm$ 1.41                   |
|               | truck                          | 12.06 $\pm$ 0.96  | 10.81 $\pm$ 0.12 | 11.96 $\pm$ 0.07  | 11.00 $\pm$ 0.51 | 26.47 $\pm$ 6.72  | 30.02 $\pm$ 1.79 | 66.14 $\pm$ 0.75                   |
|               | <i>average</i>                 | 20.57 $\pm$ 0.23  | 19.73 $\pm$ 0.07 | 21.13 $\pm$ 0.14  | 20.13 $\pm$ 0.38 | 20.49 $\pm$ 1.20  | 24.24 $\pm$ 0.91 | <b>48.63 <math>\pm</math> 0.18</b> |
| CIFAR100      | aquatic mammals                | 29.51 $\pm$ 1.00  | 23.27 $\pm$ 0.79 | 29.46 $\pm$ 0.87  | 27.64 $\pm$ 1.90 | 16.03 $\pm$ 0.85  | 19.37 $\pm$ 1.70 | 34.82 $\pm$ 1.87                   |
|               | fish                           | 25.04 $\pm$ 1.33  | 20.32 $\pm$ 1.28 | 23.92 $\pm$ 0.60  | 22.81 $\pm$ 1.66 | 13.30 $\pm$ 1.78  | 19.21 $\pm$ 0.43 | 28.85 $\pm$ 1.23                   |
|               | flowers                        | 11.00 $\pm$ 0.56  | 11.17 $\pm$ 0.32 | 11.22 $\pm$ 0.61  | 11.41 $\pm$ 1.20 | 23.69 $\pm$ 7.50  | 17.86 $\pm$ 0.96 | 38.07 $\pm$ 3.55                   |
|               | food containers                | 19.45 $\pm$ 1.01  | 19.37 $\pm$ 0.58 | 19.12 $\pm$ 0.70  | 17.69 $\pm$ 0.83 | 14.29 $\pm$ 0.50  | 15.06 $\pm$ 0.71 | 32.55 $\pm$ 1.07                   |
|               | fruit and vegetables           | 15.65 $\pm$ 1.36  | 13.70 $\pm$ 0.48 | 15.97 $\pm$ 0.49  | 15.02 $\pm$ 1.17 | 25.03 $\pm$ 5.12  | 17.58 $\pm$ 1.67 | 32.06 $\pm$ 1.44                   |
|               | household electrical devices   | 15.41 $\pm$ 0.84  | 12.66 $\pm$ 0.28 | 16.97 $\pm$ 0.45  | 13.25 $\pm$ 0.70 | 16.29 $\pm$ 2.37  | 14.77 $\pm$ 0.29 | 19.67 $\pm$ 1.26                   |
|               | household furniture            | 20.84 $\pm$ 1.59  | 17.26 $\pm$ 0.89 | 22.76 $\pm$ 1.09  | 18.47 $\pm$ 1.74 | 17.47 $\pm$ 3.15  | 14.33 $\pm$ 0.58 | 34.62 $\pm$ 1.89                   |
|               | inserts                        | 14.80 $\pm$ 1.07  | 15.54 $\pm$ 0.47 | 14.46 $\pm$ 0.42  | 15.01 $\pm$ 0.27 | 16.14 $\pm$ 2.95  | 16.37 $\pm$ 0.42 | 30.67 $\pm$ 0.89                   |
|               | large carnivores               | 16.17 $\pm$ 0.98  | 19.68 $\pm$ 1.88 | 19.46 $\pm$ 0.92  | 19.51 $\pm$ 0.53 | 24.64 $\pm$ 0.53  | 23.39 $\pm$ 3.18 | 55.01 $\pm$ 4.95                   |
|               | large man-made outdoor things  | 27.54 $\pm$ 1.60  | 26.39 $\pm$ 1.10 | 34.00 $\pm$ 0.96  | 30.55 $\pm$ 1.45 | 28.62 $\pm$ 6.09  | 23.06 $\pm$ 2.56 | 57.92 $\pm$ 2.35                   |
|               | large natural outdoor scenes   | 46.29 $\pm$ 2.49  | 48.23 $\pm$ 3.14 | 44.54 $\pm$ 2.91  | 48.01 $\pm$ 3.28 | 18.63 $\pm$ 2.31  | 18.68 $\pm$ 3.27 | 43.78 $\pm$ 2.36                   |
|               | large omnivores and herbivores | 21.15 $\pm$ 0.74  | 17.86 $\pm$ 0.14 | 23.48 $\pm$ 1.30  | 22.15 $\pm$ 0.71 | 23.13 $\pm$ 3.16  | 18.05 $\pm$ 1.46 | 45.68 $\pm$ 1.90                   |
|               | medium-sized mammals           | 20.59 $\pm$ 1.76  | 18.62 $\pm$ 0.77 | 21.90 $\pm$ 1.02  | 24.67 $\pm$ 1.56 | 24.45 $\pm$ 1.79  | 22.26 $\pm$ 3.16 | 49.82 $\pm$ 1.72                   |
|               | non-insert invertebrates       | 15.25 $\pm$ 0.45  | 16.91 $\pm$ 0.54 | 14.86 $\pm$ 0.46  | 15.40 $\pm$ 0.34 | 14.25 $\pm$ 0.69  | 15.04 $\pm$ 0.45 | 18.24 $\pm$ 0.47                   |
|               | people                         | 14.88 $\pm$ 0.75  | 12.22 $\pm$ 0.22 | 15.15 $\pm$ 0.71  | 14.40 $\pm$ 0.91 | 20.03 $\pm$ 1.78  | 16.65 $\pm$ 1.92 | 52.46 $\pm$ 2.46                   |
|               | reptiles                       | 17.58 $\pm$ 0.92  | 18.29 $\pm$ 0.84 | 19.39 $\pm$ 0.83  | 19.32 $\pm$ 0.41 | 15.57 $\pm$ 1.48  | 17.73 $\pm$ 1.69 | 28.92 $\pm$ 1.60                   |
|               | small mammals                  | 23.17 $\pm$ 0.79  | 25.25 $\pm$ 0.92 | 25.82 $\pm$ 1.51  | 27.79 $\pm$ 1.06 | 20.09 $\pm$ 2.29  | 19.43 $\pm$ 1.73 | 35.92 $\pm$ 0.79                   |
|               | trees                          | 25.84 $\pm$ 1.34  | 27.58 $\pm$ 1.59 | 29.44 $\pm$ 1.75  | 28.58 $\pm$ 1.11 | 23.48 $\pm$ 3.23  | 29.27 $\pm$ 3.39 | 63.39 $\pm$ 1.68                   |
|               | vehicles 1                     | 11.68 $\pm$ 0.48  | 11.60 $\pm$ 0.44 | 12.12 $\pm$ 0.73  | 11.69 $\pm$ 0.61 | 20.87 $\pm$ 1.22  | 19.32 $\pm$ 2.56 | 65.21 $\pm$ 1.73                   |
|               | vehicles 2                     | 15.38 $\pm$ 0.95  | 14.77 $\pm$ 0.85 | 17.98 $\pm$ 1.08  | 15.83 $\pm$ 0.85 | 17.13 $\pm$ 2.51  | 16.03 $\pm$ 0.81 | 46.35 $\pm$ 1.83                   |
|               | <i>average</i>                 | 20.36 $\pm$ 0.22  | 19.53 $\pm$ 0.35 | 21.60 $\pm$ 0.18  | 20.96 $\pm$ 0.24 | 19.66 $\pm$ 0.44  | 18.67 $\pm$ 0.27 | <b>40.70 <math>\pm</math> 0.46</b> |
| SVHN          | 0                              | 15.83 $\pm$ 0.77  | 18.51 $\pm$ 0.23 | 15.73 $\pm$ 0.38  | 16.32 $\pm$ 0.43 | 20.37 $\pm$ 4.33  | 38.43 $\pm$ 3.73 | 29.97 $\pm$ 1.49                   |
|               | 1                              | 17.59 $\pm$ 0.65  | 20.30 $\pm$ 0.68 | 18.08 $\pm$ 0.99  | 18.65 $\pm$ 0.81 | 21.37 $\pm$ 6.57  | 24.24 $\pm$ 2.65 | 27.28 $\pm$ 2.15                   |
|               | 2                              | 15.72 $\pm$ 0.28  | 17.02 $\pm$ 0.40 | 15.63 $\pm$ 0.22  | 16.30 $\pm$ 0.41 | 23.08 $\pm$ 7.58  | 28.30 $\pm$ 3.37 | 47.74 $\pm$ 2.10                   |
|               | 3                              | 15.01 $\pm$ 0.23  | 15.65 $\pm$ 0.20 | 14.69 $\pm$ 0.27  | 14.95 $\pm$ 0.25 | 24.86 $\pm$ 5.48  | 24.08 $\pm$ 1.89 | 40.33 $\pm$ 0.66                   |
|               | 4                              | 16.40 $\pm$ 0.32  | 17.88 $\pm$ 0.73 | 16.26 $\pm$ 0.30  | 17.12 $\pm$ 0.47 | 26.29 $\pm$ 9.36  | 25.53 $\pm$ 1.16 | 49.82 $\pm$ 0.99                   |
|               | 5                              | 14.92 $\pm$ 0.23  | 15.85 $\pm$ 0.18 | 14.52 $\pm$ 0.18  | 15.06 $\pm$ 0.11 | 23.13 $\pm$ 13.29 | 24.87 $\pm$ 1.95 | 50.54 $\pm$ 0.89                   |
|               | 6                              | 14.58 $\pm$ 0.35  | 15.45 $\pm$ 0.23 | 14.12 $\pm$ 0.32  | 14.73 $\pm$ 0.25 | 29.02 $\pm$ 15.07 | 27.17 $\pm$ 1.27 | 47.04 $\pm$ 1.10                   |
|               | 7                              | 17.42 $\pm$ 0.50  | 18.69 $\pm$ 0.67 | 17.09 $\pm$ 0.65  | 17.59 $\pm$ 0.50 | 30.14 $\pm$ 7.67  | 36.04 $\pm$ 2.12 | 55.95 $\pm$ 1.52                   |
|               | 8                              | 14.82 $\pm$ 0.25  | 16.16 $\pm$ 0.40 | 14.55 $\pm$ 0.26  | 15.14 $\pm$ 0.33 | 20.52 $\pm$ 10.54 | 27.21 $\pm$ 2.71 | 29.10 $\pm$ 0.95                   |
|               | 9                              | 15.28 $\pm$ 0.52  | 16.46 $\pm$ 0.49 | 15.17 $\pm$ 0.19  | 15.68 $\pm$ 0.59 | 23.63 $\pm$ 5.31  | 28.39 $\pm$ 1.72 | 46.74 $\pm$ 1.46                   |
|               | <i>average</i>                 | 15.76 $\pm$ 0.11  | 17.20 $\pm$ 0.13 | 15.58 $\pm$ 0.18  | 16.15 $\pm$ 0.14 | 24.24 $\pm$ 2.19  | 28.43 $\pm$ 0.34 | <b>42.45 <math>\pm</math> 0.59</b> |

Table 14: AUPR-out (%) (outliers as positive class) when  $\rho = 0.2$ 

| Dataset       | Class name                     | CAE              | CAE-IF           | DRAE              | RDAE             | DAGMM             | SSD-IF           | $E^3$ Outlier                      |
|---------------|--------------------------------|------------------|------------------|-------------------|------------------|-------------------|------------------|------------------------------------|
| MNIST         | 0                              | 24.25 $\pm$ 2.91 | 62.27 $\pm$ 7.97 | 33.91 $\pm$ 6.62  | 26.76 $\pm$ 5.49 | 51.46 $\pm$ 29.90 | 58.60 $\pm$ 5.61 | 71.09 $\pm$ 1.14                   |
|               | 1                              | 94.72 $\pm$ 0.76 | 95.66 $\pm$ 0.89 | 80.07 $\pm$ 15.25 | 94.57 $\pm$ 0.26 | 74.00 $\pm$ 23.72 | 81.35 $\pm$ 1.71 | 68.21 $\pm$ 1.78                   |
|               | 2                              | 23.89 $\pm$ 3.03 | 39.45 $\pm$ 4.08 | 25.56 $\pm$ 3.79  | 25.81 $\pm$ 3.18 | 21.10 $\pm$ 1.17  | 60.82 $\pm$ 1.53 | 65.28 $\pm$ 1.10                   |
|               | 3                              | 30.11 $\pm$ 3.97 | 48.24 $\pm$ 2.61 | 44.39 $\pm$ 11.30 | 35.18 $\pm$ 2.99 | 32.53 $\pm$ 11.64 | 71.18 $\pm$ 2.77 | 86.03 $\pm$ 0.46                   |
|               | 4                              | 46.04 $\pm$ 4.39 | 54.55 $\pm$ 3.66 | 46.07 $\pm$ 5.90  | 48.36 $\pm$ 4.38 | 42.00 $\pm$ 20.73 | 79.51 $\pm$ 1.49 | 74.36 $\pm$ 0.93                   |
|               | 5                              | 29.21 $\pm$ 2.04 | 38.47 $\pm$ 2.53 | 26.66 $\pm$ 4.23  | 30.33 $\pm$ 2.85 | 23.83 $\pm$ 2.52  | 68.62 $\pm$ 1.34 | 63.27 $\pm$ 1.75                   |
|               | 6                              | 34.40 $\pm$ 2.93 | 63.89 $\pm$ 5.90 | 39.16 $\pm$ 7.09  | 37.31 $\pm$ 3.60 | 51.17 $\pm$ 24.61 | 79.81 $\pm$ 1.85 | 78.60 $\pm$ 0.60                   |
|               | 7                              | 58.80 $\pm$ 5.55 | 71.69 $\pm$ 2.60 | 53.66 $\pm$ 6.73  | 61.22 $\pm$ 2.33 | 57.72 $\pm$ 18.90 | 75.56 $\pm$ 2.11 | 72.44 $\pm$ 0.52                   |
|               | 8                              | 19.86 $\pm$ 0.88 | 35.67 $\pm$ 2.05 | 32.93 $\pm$ 6.04  | 23.89 $\pm$ 1.16 | 27.07 $\pm$ 10.86 | 54.76 $\pm$ 2.44 | 66.11 $\pm$ 0.88                   |
|               | 9                              | 46.01 $\pm$ 2.95 | 62.02 $\pm$ 2.85 | 42.44 $\pm$ 6.51  | 48.90 $\pm$ 3.06 | 32.57 $\pm$ 10.13 | 80.10 $\pm$ 1.75 | 77.75 $\pm$ 1.01                   |
|               | <i>average</i>                 | 40.73 $\pm$ 0.99 | 57.19 $\pm$ 1.69 | 42.48 $\pm$ 2.33  | 43.23 $\pm$ 0.75 | 41.34 $\pm$ 5.16  | 71.03 $\pm$ 0.84 | <b>72.31 <math>\pm</math> 0.33</b> |
| Fashion-MNIST | t-shirt                        | 23.31 $\pm$ 3.49 | 46.19 $\pm$ 1.81 | 26.11 $\pm$ 2.65  | 32.45 $\pm$ 1.40 | 38.99 $\pm$ 17.60 | 66.60 $\pm$ 1.69 | 73.97 $\pm$ 0.74                   |
|               | trouser                        | 76.39 $\pm$ 1.01 | 80.92 $\pm$ 1.16 | 67.48 $\pm$ 7.84  | 79.83 $\pm$ 1.34 | 54.67 $\pm$ 18.42 | 84.15 $\pm$ 1.98 | 85.84 $\pm$ 0.77                   |
|               | pullover                       | 26.66 $\pm$ 1.09 | 45.65 $\pm$ 2.45 | 26.02 $\pm$ 1.92  | 33.19 $\pm$ 2.30 | 17.71 $\pm$ 2.38  | 74.36 $\pm$ 1.77 | 83.98 $\pm$ 0.66                   |
|               | dress                          | 32.49 $\pm$ 2.64 | 50.12 $\pm$ 2.53 | 39.56 $\pm$ 3.17  | 37.77 $\pm$ 2.77 | 66.75 $\pm$ 11.43 | 67.43 $\pm$ 1.39 | 66.79 $\pm$ 0.51                   |
|               | coat                           | 34.47 $\pm$ 2.42 | 53.01 $\pm$ 2.41 | 29.41 $\pm$ 1.87  | 38.48 $\pm$ 3.14 | 25.35 $\pm$ 12.35 | 76.62 $\pm$ 0.90 | 82.18 $\pm$ 0.86                   |
|               | sandal                         | 33.55 $\pm$ 5.41 | 24.77 $\pm$ 0.65 | 38.98 $\pm$ 2.88  | 30.15 $\pm$ 4.28 | 63.53 $\pm$ 11.03 | 62.88 $\pm$ 5.87 | 78.96 $\pm$ 1.52                   |
|               | shirt                          | 19.89 $\pm$ 1.09 | 37.51 $\pm$ 0.51 | 19.92 $\pm$ 1.00  | 23.99 $\pm$ 1.55 | 24.03 $\pm$ 7.65  | 60.59 $\pm$ 1.70 | 65.75 $\pm$ 0.52                   |
|               | sneaker                        | 60.88 $\pm$ 5.89 | 68.98 $\pm$ 1.30 | 59.68 $\pm$ 19.32 | 69.21 $\pm$ 2.75 | 64.38 $\pm$ 14.74 | 91.24 $\pm$ 0.40 | 96.21 $\pm$ 0.58                   |
|               | bag                            | 17.40 $\pm$ 0.95 | 26.26 $\pm$ 0.89 | 17.34 $\pm$ 0.63  | 18.13 $\pm$ 1.15 | 28.32 $\pm$ 11.86 | 39.41 $\pm$ 1.47 | 57.95 $\pm$ 1.78                   |
|               | ankle-boot                     | 42.82 $\pm$ 4.78 | 56.35 $\pm$ 3.60 | 41.21 $\pm$ 6.77  | 50.74 $\pm$ 4.18 | 51.50 $\pm$ 23.96 | 90.28 $\pm$ 0.95 | 97.35 $\pm$ 0.04                   |
|               | <i>average</i>                 | 36.79 $\pm$ 1.34 | 48.97 $\pm$ 0.97 | 36.57 $\pm$ 2.52  | 41.40 $\pm$ 0.88 | 43.52 $\pm$ 2.89  | 71.36 $\pm$ 0.76 | <b>78.90 <math>\pm</math> 0.32</b> |
| CIFAR10       | airplane                       | 31.34 $\pm$ 4.43 | 27.89 $\pm$ 0.60 | 35.66 $\pm$ 0.66  | 28.97 $\pm$ 2.92 | 20.32 $\pm$ 3.75  | 20.23 $\pm$ 1.27 | 41.60 $\pm$ 1.15                   |
|               | automobile                     | 15.91 $\pm$ 1.22 | 14.95 $\pm$ 0.31 | 15.62 $\pm$ 0.30  | 14.38 $\pm$ 0.30 | 32.31 $\pm$ 4.03  | 33.73 $\pm$ 4.39 | 79.73 $\pm$ 0.71                   |
|               | bird                           | 28.71 $\pm$ 1.48 | 30.73 $\pm$ 0.70 | 31.25 $\pm$ 0.88  | 31.90 $\pm$ 0.54 | 18.95 $\pm$ 2.30  | 22.01 $\pm$ 2.16 | 29.45 $\pm$ 0.94                   |
|               | cat                            | 26.01 $\pm$ 1.59 | 22.48 $\pm$ 0.59 | 26.31 $\pm$ 0.56  | 24.59 $\pm$ 1.55 | 22.79 $\pm$ 1.29  | 22.39 $\pm$ 2.15 | 27.81 $\pm$ 1.73                   |
|               | deer                           | 31.61 $\pm$ 1.79 | 38.29 $\pm$ 0.72 | 33.79 $\pm$ 0.72  | 37.69 $\pm$ 1.04 | 23.90 $\pm$ 4.55  | 28.57 $\pm$ 1.92 | 48.52 $\pm$ 1.60                   |
|               | dog                            | 25.96 $\pm$ 1.48 | 21.62 $\pm$ 0.57 | 28.28 $\pm$ 0.61  | 25.45 $\pm$ 0.65 | 23.61 $\pm$ 3.02  | 29.78 $\pm$ 2.47 | 47.05 $\pm$ 3.04                   |
|               | frog                           | 20.44 $\pm$ 2.29 | 29.81 $\pm$ 0.78 | 19.31 $\pm$ 0.65  | 23.17 $\pm$ 1.51 | 29.39 $\pm$ 5.21  | 28.80 $\pm$ 2.11 | 45.62 $\pm$ 1.81                   |
|               | horse                          | 20.25 $\pm$ 0.91 | 19.15 $\pm$ 0.54 | 21.56 $\pm$ 0.32  | 20.25 $\pm$ 0.23 | 25.77 $\pm$ 5.59  | 32.38 $\pm$ 2.19 | 66.72 $\pm$ 1.68                   |
|               | ship                           | 38.81 $\pm$ 4.02 | 33.61 $\pm$ 1.02 | 40.14 $\pm$ 0.88  | 36.11 $\pm$ 3.39 | 26.21 $\pm$ 10.64 | 31.80 $\pm$ 2.66 | 72.48 $\pm$ 1.70                   |
|               | truck                          | 15.58 $\pm$ 0.61 | 14.40 $\pm$ 0.17 | 15.64 $\pm$ 0.20  | 14.48 $\pm$ 0.40 | 39.80 $\pm$ 8.34  | 31.89 $\pm$ 1.99 | 68.15 $\pm$ 1.77                   |
|               | <i>average</i>                 | 25.46 $\pm$ 0.63 | 25.29 $\pm$ 0.06 | 26.76 $\pm$ 0.20  | 25.70 $\pm$ 0.66 | 26.30 $\pm$ 0.64  | 28.16 $\pm$ 0.74 | <b>52.71 <math>\pm</math> 0.24</b> |
| CIFAR100      | aquatic mammals                | 36.66 $\pm$ 2.20 | 29.09 $\pm$ 1.15 | 37.22 $\pm$ 1.66  | 35.87 $\pm$ 1.39 | 23.02 $\pm$ 3.30  | 23.26 $\pm$ 1.57 | 41.89 $\pm$ 1.35                   |
|               | fish                           | 30.51 $\pm$ 2.17 | 26.26 $\pm$ 0.47 | 30.55 $\pm$ 0.93  | 29.02 $\pm$ 1.86 | 18.46 $\pm$ 1.59  | 25.19 $\pm$ 1.83 | 34.24 $\pm$ 0.79                   |
|               | flowers                        | 14.74 $\pm$ 0.71 | 14.98 $\pm$ 0.25 | 15.00 $\pm$ 0.53  | 16.11 $\pm$ 1.76 | 31.44 $\pm$ 5.00  | 22.58 $\pm$ 1.17 | 45.67 $\pm$ 1.41                   |
|               | food containers                | 24.99 $\pm$ 1.19 | 25.80 $\pm$ 0.73 | 25.02 $\pm$ 0.39  | 24.17 $\pm$ 0.74 | 17.65 $\pm$ 1.82  | 18.28 $\pm$ 0.91 | 39.26 $\pm$ 1.32                   |
|               | fruit and vegetables           | 20.23 $\pm$ 1.96 | 17.91 $\pm$ 0.46 | 21.13 $\pm$ 0.51  | 18.98 $\pm$ 1.46 | 29.48 $\pm$ 4.84  | 21.98 $\pm$ 0.76 | 38.17 $\pm$ 1.69                   |
|               | household electrical devices   | 19.65 $\pm$ 0.64 | 16.83 $\pm$ 0.11 | 22.26 $\pm$ 0.42  | 17.91 $\pm$ 1.05 | 20.48 $\pm$ 1.18  | 19.16 $\pm$ 0.88 | 25.08 $\pm$ 1.04                   |
|               | household furniture            | 25.99 $\pm$ 2.64 | 22.77 $\pm$ 0.38 | 28.40 $\pm$ 0.34  | 25.26 $\pm$ 1.72 | 19.72 $\pm$ 1.98  | 18.95 $\pm$ 0.65 | 41.66 $\pm$ 2.13                   |
|               | inserts                        | 18.98 $\pm$ 0.90 | 20.43 $\pm$ 0.51 | 19.08 $\pm$ 0.57  | 19.67 $\pm$ 1.15 | 19.76 $\pm$ 0.67  | 22.00 $\pm$ 1.20 | 34.74 $\pm$ 1.23                   |
|               | large carnivores               | 22.03 $\pm$ 1.94 | 24.64 $\pm$ 1.35 | 24.20 $\pm$ 1.01  | 26.55 $\pm$ 2.33 | 28.81 $\pm$ 3.13  | 26.56 $\pm$ 1.98 | 59.16 $\pm$ 2.97                   |
|               | large man-made outdoor things  | 34.84 $\pm$ 1.73 | 32.68 $\pm$ 2.17 | 39.87 $\pm$ 0.74  | 35.65 $\pm$ 1.14 | 31.46 $\pm$ 7.10  | 27.52 $\pm$ 3.91 | 63.81 $\pm$ 0.40                   |
|               | large natural outdoor scenes   | 50.56 $\pm$ 2.94 | 56.18 $\pm$ 1.93 | 49.58 $\pm$ 1.49  | 53.74 $\pm$ 2.93 | 23.04 $\pm$ 2.22  | 24.90 $\pm$ 1.57 | 50.57 $\pm$ 1.73                   |
|               | large omnivores and herbivores | 26.28 $\pm$ 1.07 | 23.81 $\pm$ 0.71 | 29.68 $\pm$ 0.83  | 29.28 $\pm$ 1.36 | 28.73 $\pm$ 2.53  | 24.98 $\pm$ 2.08 | 51.20 $\pm$ 1.55                   |
|               | medium-sized mammals           | 27.10 $\pm$ 0.38 | 24.12 $\pm$ 1.37 | 28.99 $\pm$ 1.67  | 31.94 $\pm$ 2.70 | 32.96 $\pm$ 2.30  | 27.86 $\pm$ 1.44 | 54.05 $\pm$ 2.46                   |
|               | non-insert invertebrates       | 20.32 $\pm$ 0.87 | 22.18 $\pm$ 0.60 | 19.71 $\pm$ 0.36  | 20.43 $\pm$ 0.61 | 18.69 $\pm$ 0.86  | 19.88 $\pm$ 0.90 | 23.41 $\pm$ 0.46                   |
|               | people                         | 20.36 $\pm$ 1.06 | 16.54 $\pm$ 0.52 | 20.09 $\pm$ 0.78  | 18.95 $\pm$ 0.72 | 27.29 $\pm$ 1.33  | 22.76 $\pm$ 1.81 | 61.09 $\pm$ 1.17                   |
|               | reptiles                       | 23.66 $\pm$ 0.76 | 24.82 $\pm$ 0.49 | 24.53 $\pm$ 0.98  | 24.97 $\pm$ 1.20 | 19.94 $\pm$ 0.50  | 21.78 $\pm$ 0.73 | 35.34 $\pm$ 0.90                   |
|               | small mammals                  | 29.41 $\pm$ 1.26 | 32.44 $\pm$ 1.25 | 31.71 $\pm$ 0.77  | 33.25 $\pm$ 1.55 | 24.36 $\pm$ 1.29  | 24.22 $\pm$ 1.84 | 42.04 $\pm$ 0.88                   |
|               | trees                          | 30.73 $\pm$ 3.21 | 34.51 $\pm$ 1.98 | 34.08 $\pm$ 1.45  | 32.95 $\pm$ 2.07 | 29.95 $\pm$ 2.59  | 32.09 $\pm$ 3.10 | 68.32 $\pm$ 1.04                   |
|               | vehicles 1                     | 15.06 $\pm$ 0.91 | 15.51 $\pm$ 0.39 | 15.79 $\pm$ 0.41  | 15.30 $\pm$ 0.47 | 27.42 $\pm$ 2.77  | 24.05 $\pm$ 2.14 | 69.71 $\pm$ 0.83                   |
|               | vehicles 2                     | 20.66 $\pm$ 1.63 | 19.68 $\pm$ 0.86 | 22.59 $\pm$ 1.01  | 20.65 $\pm$ 1.58 | 21.52 $\pm$ 2.03  | 20.07 $\pm$ 1.14 | 50.69 $\pm$ 2.06                   |
|               | <i>average</i>                 | 25.64 $\pm$ 0.58 | 25.06 $\pm$ 0.40 | 26.97 $\pm$ 0.19  | 26.53 $\pm$ 0.37 | 24.71 $\pm$ 0.65  | 23.40 $\pm$ 0.49 | <b>46.51 <math>\pm</math> 0.39</b> |
| SVHN          | 0                              | 20.71 $\pm$ 0.90 | 23.42 $\pm$ 0.52 | 20.54 $\pm$ 0.25  | 21.10 $\pm$ 0.43 | 27.42 $\pm$ 6.70  | 46.08 $\pm$ 4.35 | 33.12 $\pm$ 0.92                   |
|               | 1                              | 23.18 $\pm$ 0.72 | 25.92 $\pm$ 0.84 | 23.34 $\pm$ 0.70  | 23.55 $\pm$ 0.41 | 28.19 $\pm$ 6.77  | 28.43 $\pm$ 1.74 | 30.96 $\pm$ 1.14                   |
|               | 2                              | 20.64 $\pm$ 0.41 | 22.16 $\pm$ 0.51 | 20.79 $\pm$ 0.29  | 21.28 $\pm$ 0.38 | 35.36 $\pm$ 9.87  | 32.95 $\pm$ 2.88 | 51.79 $\pm$ 1.97                   |
|               | 3                              | 20.00 $\pm$ 0.19 | 20.75 $\pm$ 0.34 | 19.59 $\pm$ 0.13  | 20.18 $\pm$ 0.17 | 33.42 $\pm$ 7.00  | 27.36 $\pm$ 0.60 | 46.89 $\pm$ 0.88                   |
|               | 4                              | 21.52 $\pm$ 0.45 | 23.06 $\pm$ 0.40 | 21.38 $\pm$ 0.47  | 22.21 $\pm$ 0.44 | 26.43 $\pm$ 3.86  | 28.22 $\pm$ 1.60 | 54.93 $\pm$ 0.93                   |
|               | 5                              | 19.52 $\pm$ 0.48 | 21.04 $\pm$ 0.26 | 19.39 $\pm$ 0.28  | 20.00 $\pm$ 0.39 | 28.82 $\pm$ 6.88  | 30.49 $\pm$ 3.15 | 55.75 $\pm$ 0.81                   |
|               | 6                              | 19.57 $\pm$ 0.62 | 20.28 $\pm$ 0.34 | 18.81 $\pm$ 0.49  | 19.73 $\pm$ 0.36 | 30.68 $\pm$ 8.93  | 34.32 $\pm$ 1.32 | 50.58 $\pm$ 1.54                   |
|               | 7                              | 22.19 $\pm$ 0.56 | 23.73 $\pm$ 0.57 | 22.15 $\pm$ 0.37  | 22.27 $\pm$ 1.12 | 32.77 $\pm$ 7.82  | 38.24 $\pm$ 3.78 | 60.84 $\pm$ 1.01                   |
|               | 8                              | 19.76 $\pm$ 0.46 | 21.12 $\pm$ 0.43 | 19.25 $\pm$ 0.21  | 20.06 $\pm$ 0.33 | 26.54 $\pm$ 6.64  | 35.86 $\pm$ 3.21 | 33.97 $\pm$ 0.91                   |
|               | 9                              | 19.98 $\pm$ 0.71 | 22.42 $\pm$ 0.39 | 20.14 $\pm$ 0.31  | 20.76 $\pm$ 0.65 | 26.65 $\pm$ 7.12  | 35.45 $\pm$ 1.65 | 50.85 $\pm$ 1.01                   |
|               | <i>average</i>                 | 20.71 $\pm$ 0.14 | 22.39 $\pm$ 0.11 | 20.54 $\pm$ 0.18  | 21.12 $\pm$ 0.19 | 29.63 $\pm$ 1.91  | 33.74 $\pm$ 0.68 | <b>46.97 <math>\pm</math> 0.47</b> |

Table 15: AUPR-out (%) (outliers as positive class) when  $\rho = 0.25$ 

| Dataset       | Class name                     | CAE              | CAE-IF           | DRAE              | RDAE             | DAGMM             | SSD-IF           | $E^3$ Outlier                      |
|---------------|--------------------------------|------------------|------------------|-------------------|------------------|-------------------|------------------|------------------------------------|
| MNIST         | 0                              | 26.69 $\pm$ 2.62 | 61.98 $\pm$ 3.88 | 40.68 $\pm$ 6.14  | 28.46 $\pm$ 3.48 | 45.38 $\pm$ 22.35 | 60.50 $\pm$ 3.40 | 68.47 $\pm$ 3.22                   |
|               | 1                              | 94.06 $\pm$ 3.44 | 94.00 $\pm$ 1.46 | 90.14 $\pm$ 1.79  | 93.20 $\pm$ 2.68 | 70.89 $\pm$ 26.56 | 82.89 $\pm$ 1.59 | 65.56 $\pm$ 0.89                   |
|               | 2                              | 26.39 $\pm$ 1.73 | 40.16 $\pm$ 2.33 | 34.85 $\pm$ 3.59  | 31.38 $\pm$ 2.83 | 25.39 $\pm$ 4.49  | 62.53 $\pm$ 1.94 | 69.14 $\pm$ 0.97                   |
|               | 3                              | 31.81 $\pm$ 2.64 | 51.47 $\pm$ 1.95 | 35.32 $\pm$ 13.26 | 35.15 $\pm$ 3.33 | 35.09 $\pm$ 10.86 | 71.62 $\pm$ 1.94 | 86.50 $\pm$ 1.27                   |
|               | 4                              | 43.44 $\pm$ 6.28 | 59.23 $\pm$ 2.21 | 42.84 $\pm$ 3.19  | 50.36 $\pm$ 5.38 | 47.61 $\pm$ 23.44 | 79.42 $\pm$ 0.99 | 77.31 $\pm$ 1.09                   |
|               | 5                              | 32.41 $\pm$ 1.86 | 44.70 $\pm$ 2.81 | 38.17 $\pm$ 12.58 | 40.02 $\pm$ 3.50 | 25.95 $\pm$ 2.35  | 67.59 $\pm$ 2.17 | 65.84 $\pm$ 1.36                   |
|               | 6                              | 36.60 $\pm$ 4.95 | 62.75 $\pm$ 2.00 | 37.44 $\pm$ 8.17  | 46.62 $\pm$ 4.35 | 38.33 $\pm$ 23.37 | 77.45 $\pm$ 2.75 | 80.22 $\pm$ 0.96                   |
|               | 7                              | 62.03 $\pm$ 4.27 | 74.01 $\pm$ 3.36 | 55.28 $\pm$ 4.22  | 65.42 $\pm$ 3.90 | 52.38 $\pm$ 17.20 | 76.34 $\pm$ 2.20 | 74.78 $\pm$ 0.63                   |
|               | 8                              | 22.26 $\pm$ 2.33 | 41.25 $\pm$ 2.81 | 25.36 $\pm$ 2.37  | 23.14 $\pm$ 0.73 | 30.70 $\pm$ 8.07  | 59.19 $\pm$ 2.95 | 68.80 $\pm$ 0.65                   |
|               | 9                              | 51.43 $\pm$ 3.32 | 67.11 $\pm$ 1.99 | 48.58 $\pm$ 7.40  | 56.62 $\pm$ 2.20 | 37.12 $\pm$ 9.85  | 81.94 $\pm$ 1.58 | 80.65 $\pm$ 0.60                   |
|               | <i>average</i>                 | 42.71 $\pm$ 1.24 | 59.67 $\pm$ 0.84 | 44.87 $\pm$ 2.48  | 47.04 $\pm$ 0.55 | 40.88 $\pm$ 3.97  | 71.95 $\pm$ 0.61 | <b>73.73 <math>\pm</math> 0.43</b> |
| Fashion-MNIST | t-shirt                        | 27.79 $\pm$ 3.40 | 53.62 $\pm$ 1.60 | 32.42 $\pm$ 4.37  | 35.58 $\pm$ 2.88 | 43.22 $\pm$ 15.34 | 68.48 $\pm$ 1.48 | 75.03 $\pm$ 1.20                   |
|               | trouser                        | 79.63 $\pm$ 1.17 | 80.78 $\pm$ 1.23 | 70.34 $\pm$ 8.39  | 81.79 $\pm$ 2.14 | 56.03 $\pm$ 7.78  | 84.23 $\pm$ 1.43 | 84.96 $\pm$ 0.99                   |
|               | pullover                       | 27.88 $\pm$ 1.39 | 51.84 $\pm$ 1.78 | 31.52 $\pm$ 1.33  | 38.05 $\pm$ 1.43 | 25.99 $\pm$ 5.43  | 76.97 $\pm$ 1.06 | 84.77 $\pm$ 0.51                   |
|               | dress                          | 40.74 $\pm$ 2.45 | 56.84 $\pm$ 2.57 | 43.36 $\pm$ 1.86  | 42.67 $\pm$ 2.05 | 44.94 $\pm$ 15.89 | 69.80 $\pm$ 2.91 | 68.50 $\pm$ 1.00                   |
|               | coat                           | 37.53 $\pm$ 4.41 | 57.29 $\pm$ 0.66 | 34.09 $\pm$ 1.08  | 43.48 $\pm$ 1.83 | 29.01 $\pm$ 6.65  | 79.60 $\pm$ 1.52 | 82.75 $\pm$ 0.38                   |
|               | sandal                         | 38.60 $\pm$ 5.78 | 29.14 $\pm$ 1.53 | 40.25 $\pm$ 1.50  | 35.98 $\pm$ 4.69 | 61.05 $\pm$ 18.57 | 60.85 $\pm$ 5.39 | 73.96 $\pm$ 6.75                   |
|               | shirt                          | 23.85 $\pm$ 1.08 | 42.73 $\pm$ 0.84 | 24.60 $\pm$ 0.83  | 30.69 $\pm$ 1.80 | 29.42 $\pm$ 3.78  | 64.51 $\pm$ 1.72 | 66.43 $\pm$ 0.39                   |
|               | sneaker                        | 67.30 $\pm$ 3.20 | 70.95 $\pm$ 1.11 | 71.05 $\pm$ 5.14  | 68.38 $\pm$ 2.82 | 68.99 $\pm$ 21.31 | 91.21 $\pm$ 1.70 | 96.67 $\pm$ 0.37                   |
|               | bag                            | 20.41 $\pm$ 2.31 | 30.39 $\pm$ 0.99 | 21.55 $\pm$ 0.79  | 21.53 $\pm$ 2.04 | 29.38 $\pm$ 5.81  | 37.12 $\pm$ 4.00 | 56.80 $\pm$ 1.88                   |
|               | ankle-boot                     | 48.66 $\pm$ 5.26 | 56.81 $\pm$ 3.54 | 44.80 $\pm$ 1.86  | 53.07 $\pm$ 3.63 | 45.05 $\pm$ 20.44 | 88.68 $\pm$ 1.62 | 97.13 $\pm$ 0.14                   |
|               | <i>average</i>                 | 41.24 $\pm$ 0.92 | 53.04 $\pm$ 0.64 | 41.40 $\pm$ 0.89  | 45.12 $\pm$ 0.99 | 43.31 $\pm$ 5.88  | 72.14 $\pm$ 1.17 | <b>78.70 <math>\pm</math> 0.36</b> |
| CIFAR10       | airplane                       | 38.96 $\pm$ 3.07 | 33.38 $\pm$ 0.85 | 41.42 $\pm$ 1.00  | 34.78 $\pm$ 3.14 | 23.97 $\pm$ 5.71  | 24.56 $\pm$ 0.85 | 44.14 $\pm$ 1.63                   |
|               | automobile                     | 19.54 $\pm$ 0.71 | 18.82 $\pm$ 0.16 | 19.69 $\pm$ 0.34  | 17.90 $\pm$ 0.21 | 39.18 $\pm$ 5.95  | 38.53 $\pm$ 3.50 | 80.42 $\pm$ 2.32                   |
|               | bird                           | 34.55 $\pm$ 0.55 | 37.27 $\pm$ 0.44 | 37.00 $\pm$ 0.36  | 37.87 $\pm$ 0.61 | 23.04 $\pm$ 1.53  | 26.59 $\pm$ 1.26 | 34.57 $\pm$ 1.27                   |
|               | cat                            | 31.41 $\pm$ 0.64 | 27.32 $\pm$ 0.40 | 32.59 $\pm$ 0.46  | 29.90 $\pm$ 1.47 | 27.39 $\pm$ 3.23  | 28.18 $\pm$ 0.57 | 30.73 $\pm$ 0.49                   |
|               | deer                           | 37.47 $\pm$ 2.32 | 44.59 $\pm$ 0.28 | 39.53 $\pm$ 0.92  | 42.77 $\pm$ 0.85 | 28.76 $\pm$ 4.05  | 33.95 $\pm$ 1.32 | 52.42 $\pm$ 1.41                   |
|               | dog                            | 31.17 $\pm$ 0.87 | 26.41 $\pm$ 0.35 | 33.82 $\pm$ 0.33  | 30.68 $\pm$ 1.21 | 31.95 $\pm$ 2.78  | 33.73 $\pm$ 3.15 | 52.31 $\pm$ 2.20                   |
|               | frog                           | 24.56 $\pm$ 1.26 | 35.89 $\pm$ 0.59 | 23.40 $\pm$ 0.73  | 29.77 $\pm$ 1.60 | 32.87 $\pm$ 4.82  | 34.05 $\pm$ 2.64 | 48.20 $\pm$ 1.59                   |
|               | horse                          | 24.79 $\pm$ 0.83 | 23.87 $\pm$ 0.63 | 26.91 $\pm$ 0.62  | 25.06 $\pm$ 0.81 | 32.53 $\pm$ 4.39  | 38.86 $\pm$ 3.58 | 68.17 $\pm$ 2.60                   |
|               | ship                           | 43.19 $\pm$ 4.65 | 39.69 $\pm$ 0.80 | 46.05 $\pm$ 0.57  | 43.47 $\pm$ 2.32 | 30.15 $\pm$ 9.33  | 35.85 $\pm$ 4.28 | 74.13 $\pm$ 1.86                   |
|               | truck                          | 19.79 $\pm$ 0.35 | 18.22 $\pm$ 0.27 | 19.71 $\pm$ 0.22  | 17.96 $\pm$ 0.54 | 40.91 $\pm$ 7.75  | 34.47 $\pm$ 2.65 | 72.34 $\pm$ 0.73                   |
|               | <i>average</i>                 | 30.54 $\pm$ 0.71 | 30.55 $\pm$ 0.11 | 32.01 $\pm$ 0.19  | 31.02 $\pm$ 0.25 | 31.08 $\pm$ 1.81  | 32.88 $\pm$ 0.73 | <b>55.74 <math>\pm</math> 0.51</b> |
| CIFAR100      | aquatic mammals                | 42.17 $\pm$ 2.54 | 35.40 $\pm$ 1.19 | 42.88 $\pm$ 1.78  | 39.01 $\pm$ 2.62 | 25.57 $\pm$ 2.12  | 29.01 $\pm$ 1.25 | 47.31 $\pm$ 1.54                   |
|               | fish                           | 37.83 $\pm$ 1.98 | 32.10 $\pm$ 1.51 | 36.94 $\pm$ 0.60  | 35.71 $\pm$ 1.91 | 21.97 $\pm$ 2.39  | 30.98 $\pm$ 2.79 | 39.58 $\pm$ 1.19                   |
|               | flowers                        | 18.09 $\pm$ 0.50 | 19.17 $\pm$ 0.42 | 18.64 $\pm$ 0.40  | 20.22 $\pm$ 1.49 | 30.54 $\pm$ 6.71  | 29.80 $\pm$ 3.09 | 48.77 $\pm$ 1.79                   |
|               | food containers                | 31.34 $\pm$ 1.00 | 30.94 $\pm$ 0.93 | 30.70 $\pm$ 0.58  | 27.36 $\pm$ 2.04 | 23.19 $\pm$ 1.65  | 23.87 $\pm$ 1.13 | 42.69 $\pm$ 1.76                   |
|               | fruit and vegetables           | 25.70 $\pm$ 2.10 | 22.75 $\pm$ 0.46 | 25.88 $\pm$ 0.31  | 24.81 $\pm$ 1.18 | 35.12 $\pm$ 4.33  | 26.15 $\pm$ 1.34 | 44.05 $\pm$ 1.02                   |
|               | household electrical devices   | 26.00 $\pm$ 1.10 | 20.91 $\pm$ 0.35 | 27.27 $\pm$ 0.52  | 22.36 $\pm$ 1.12 | 25.54 $\pm$ 3.74  | 23.93 $\pm$ 0.83 | 29.21 $\pm$ 0.75                   |
|               | household furniture            | 33.97 $\pm$ 0.47 | 26.97 $\pm$ 0.71 | 34.26 $\pm$ 0.62  | 28.66 $\pm$ 4.48 | 26.80 $\pm$ 5.16  | 22.29 $\pm$ 0.35 | 47.64 $\pm$ 1.37                   |
|               | inserts                        | 22.91 $\pm$ 0.96 | 25.33 $\pm$ 0.84 | 23.58 $\pm$ 0.51  | 24.33 $\pm$ 1.07 | 23.34 $\pm$ 2.39  | 28.23 $\pm$ 0.83 | 40.23 $\pm$ 0.66                   |
|               | large carnivores               | 26.33 $\pm$ 1.05 | 29.78 $\pm$ 1.32 | 28.75 $\pm$ 0.57  | 30.54 $\pm$ 1.06 | 36.38 $\pm$ 1.68  | 32.37 $\pm$ 2.48 | 60.85 $\pm$ 2.53                   |
|               | large man-made outdoor things  | 40.66 $\pm$ 4.33 | 37.86 $\pm$ 1.32 | 45.53 $\pm$ 1.06  | 43.49 $\pm$ 3.14 | 39.77 $\pm$ 5.00  | 30.71 $\pm$ 1.07 | 70.37 $\pm$ 1.41                   |
|               | large natural outdoor scenes   | 58.07 $\pm$ 0.69 | 60.32 $\pm$ 0.90 | 56.01 $\pm$ 0.51  | 59.39 $\pm$ 2.45 | 27.85 $\pm$ 3.17  | 32.72 $\pm$ 2.16 | 56.96 $\pm$ 1.66                   |
|               | large omnivores and herbivores | 31.52 $\pm$ 0.76 | 28.80 $\pm$ 0.46 | 34.34 $\pm$ 0.82  | 33.78 $\pm$ 0.95 | 33.20 $\pm$ 3.81  | 29.08 $\pm$ 1.35 | 57.69 $\pm$ 1.40                   |
|               | medium-sized mammals           | 33.18 $\pm$ 0.43 | 29.39 $\pm$ 0.78 | 32.86 $\pm$ 1.30  | 34.31 $\pm$ 0.84 | 37.37 $\pm$ 2.60  | 30.85 $\pm$ 1.56 | 56.59 $\pm$ 1.56                   |
|               | non-insert invertebrates       | 25.24 $\pm$ 0.42 | 27.58 $\pm$ 0.47 | 24.60 $\pm$ 0.50  | 25.73 $\pm$ 0.98 | 23.03 $\pm$ 1.20  | 24.53 $\pm$ 1.11 | 28.13 $\pm$ 0.66                   |
|               | people                         | 24.36 $\pm$ 0.66 | 20.83 $\pm$ 0.47 | 25.00 $\pm$ 0.87  | 23.41 $\pm$ 1.28 | 31.73 $\pm$ 2.29  | 26.46 $\pm$ 1.14 | 63.12 $\pm$ 1.63                   |
|               | reptiles                       | 28.78 $\pm$ 1.46 | 30.05 $\pm$ 0.15 | 30.14 $\pm$ 0.97  | 30.74 $\pm$ 1.31 | 25.00 $\pm$ 2.41  | 27.32 $\pm$ 1.12 | 41.48 $\pm$ 0.40                   |
|               | small mammals                  | 35.88 $\pm$ 1.50 | 39.24 $\pm$ 0.80 | 37.20 $\pm$ 1.34  | 41.20 $\pm$ 0.60 | 29.51 $\pm$ 1.53  | 28.89 $\pm$ 1.85 | 46.62 $\pm$ 1.06                   |
|               | trees                          | 37.26 $\pm$ 2.71 | 39.51 $\pm$ 1.26 | 38.63 $\pm$ 1.24  | 41.60 $\pm$ 1.76 | 35.39 $\pm$ 0.81  | 36.33 $\pm$ 1.39 | 73.18 $\pm$ 1.49                   |
|               | vehicles 1                     | 18.98 $\pm$ 0.41 | 19.72 $\pm$ 0.57 | 19.68 $\pm$ 0.68  | 20.68 $\pm$ 0.96 | 31.55 $\pm$ 2.30  | 27.76 $\pm$ 1.88 | 74.05 $\pm$ 1.63                   |
|               | vehicles 2                     | 24.53 $\pm$ 1.52 | 24.37 $\pm$ 0.63 | 27.32 $\pm$ 0.97  | 25.49 $\pm$ 2.01 | 25.14 $\pm$ 1.66  | 24.68 $\pm$ 1.48 | 58.09 $\pm$ 1.83                   |
|               | <i>average</i>                 | 31.14 $\pm$ 0.45 | 30.05 $\pm$ 0.38 | 32.01 $\pm$ 0.30  | 31.64 $\pm$ 0.34 | 29.40 $\pm$ 0.92  | 28.30 $\pm$ 0.65 | <b>51.33 <math>\pm</math> 0.45</b> |
| SVHN          | 0                              | 25.65 $\pm$ 0.15 | 28.93 $\pm$ 0.55 | 25.43 $\pm$ 0.45  | 26.37 $\pm$ 0.23 | 31.04 $\pm$ 4.68  | 48.86 $\pm$ 1.17 | 34.80 $\pm$ 1.07                   |
|               | 1                              | 29.07 $\pm$ 0.94 | 31.72 $\pm$ 0.71 | 28.75 $\pm$ 0.34  | 29.29 $\pm$ 1.06 | 38.81 $\pm$ 14.53 | 36.22 $\pm$ 2.46 | 35.50 $\pm$ 0.44                   |
|               | 2                              | 26.06 $\pm$ 0.49 | 27.01 $\pm$ 0.55 | 25.90 $\pm$ 0.49  | 26.54 $\pm$ 0.40 | 38.99 $\pm$ 8.09  | 35.80 $\pm$ 1.11 | 56.45 $\pm$ 1.68                   |
|               | 3                              | 24.73 $\pm$ 0.29 | 25.29 $\pm$ 0.33 | 24.52 $\pm$ 0.56  | 24.98 $\pm$ 0.35 | 37.41 $\pm$ 7.81  | 30.83 $\pm$ 2.58 | 51.16 $\pm$ 0.91                   |
|               | 4                              | 26.48 $\pm$ 0.51 | 28.32 $\pm$ 0.53 | 26.63 $\pm$ 0.32  | 27.23 $\pm$ 0.25 | 41.05 $\pm$ 8.46  | 33.94 $\pm$ 2.11 | 59.22 $\pm$ 1.78                   |
|               | 5                              | 24.12 $\pm$ 0.23 | 25.90 $\pm$ 0.44 | 24.33 $\pm$ 0.41  | 24.71 $\pm$ 0.50 | 29.96 $\pm$ 5.51  | 34.70 $\pm$ 1.81 | 60.51 $\pm$ 0.63                   |
|               | 6                              | 24.12 $\pm$ 0.37 | 25.18 $\pm$ 0.49 | 23.63 $\pm$ 0.56  | 24.25 $\pm$ 0.27 | 32.34 $\pm$ 5.84  | 37.64 $\pm$ 2.15 | 54.78 $\pm$ 0.90                   |
|               | 7                              | 27.85 $\pm$ 0.56 | 29.40 $\pm$ 0.63 | 26.88 $\pm$ 1.01  | 28.12 $\pm$ 0.57 | 39.21 $\pm$ 14.43 | 44.16 $\pm$ 2.30 | 64.05 $\pm$ 0.94                   |
|               | 8                              | 24.49 $\pm$ 0.40 | 26.45 $\pm$ 0.46 | 24.47 $\pm$ 0.35  | 25.11 $\pm$ 0.42 | 31.96 $\pm$ 5.79  | 39.07 $\pm$ 2.67 | 37.75 $\pm$ 1.14                   |
|               | 9                              | 24.79 $\pm$ 0.57 | 26.72 $\pm$ 0.67 | 24.79 $\pm$ 0.23  | 25.23 $\pm$ 0.56 | 39.40 $\pm$ 11.69 | 38.84 $\pm$ 2.13 | 55.71 $\pm$ 1.42                   |
|               | <i>average</i>                 | 25.74 $\pm$ 0.13 | 27.49 $\pm$ 0.16 | 25.53 $\pm$ 0.25  | 26.18 $\pm$ 0.18 | 36.02 $\pm$ 5.04  | 38.01 $\pm$ 0.69 | <b>50.99 <math>\pm</math> 0.40</b> |
